# Supplementary material for: Assessing the quality of life among African medical and health science students using the WHOQOL-BREF tool
Source: PeerJ. 2025 Feb 7;13:e18809. doi: 10.7717/peerj.18809 (PMC11809301; doi:10.7717/peerj.18809)
Supplement: Supplemental Information 1 [file peerj-13-18809-s001.xlsx]

## Sheet: Sheet1
Gender	Nationality	Age	Marital Status	Your Faculty	Year / Level	Q1 - How would you rate your quality of life?	Q2 - How satisfied are you with your health?	Q 3 - To what extent do you feel that physical pain prevents you from doing what you need to do?	Q 4- How much do you need any medical treatment to function in your daily life?	Q 5 - How much do you enjoy life?	Q 6 - To what extent do you feel your life to be meaningful?	Q 7 - How well are you able to concentrate?	Q 8- How safe do you feel in your daily life?	Q 9 -How healthy is your physical environment?	Q 10 - Do you have enough energy for everyday life?	Q -11. Are you able to accept your bodily appearance?	Q 12- Have you enough money to meet your needs	Q 13 - How available to you is the information that you need in your day-to-day life?	Q 14 - To what extent do you have the opportunity for leisure activities?	Q 15 - How well are you able to get around?	Q 16 - How satisfied are you with your sleep?	Q 17 - How satisfied are you with your ability to perform your daily living activities?	Q 18 - How satisfied are you with your capacity for work?	Q 19 - How satisfied are you with yourself?	Q 20 - How satisfied are you with your personal relationships?	Q 21- How satisfied are you with your sexual life?	Q 22 - How satisfied are you with the support you get from your friends?	Q 23 - How satisfied are you with the conditions of your living place?	Q 24 - How satisfied are you with your access to health services?	Q 25- How satisfied are you with your transport?	Q 26 - How often do you have negative feelings such as blue mood, despair, anxiety, depression?
1	Abbas salih suliman	>23 Years	Single	Nursing	Third Year	Neither poor nor good	Dissatisfied	3. A moderate amount	3. A moderate amount	4. Very much	3. A moderate amount	1. Not at all	5. An extreme amount	3. A moderate amount	3. Moderately	2. A little	1. Not at all	3. Moderately	3. Moderately	3. Neither poor nor good	5. Very Satisfied	1. Very dissatisfied	2. Dissatisfied	1. Very dissatisfied	2. Dissatisfied	1. Very dissatisfied	1. Very dissatisfied	1. Very dissatisfied	2. Dissatisfied	2. Dissatisfied	1. Never
1	Chadian	>23 Years	Single	Laboratory	Forth year	Good	satisfied	2. A little	2. A little	4. Very much	5. An extreme amount	4. Very much	4. Very much	5. An extreme amount	4. Mostly	5. Completely	3. Moderately	2. A little	2. A little	3. Neither poor nor good	4. satisfied	4. satisfied	2. Dissatisfied	4. Satisfied	5. Very Satisfied	4. Satisfied	4. Satisfied	2. Dissatisfied	2. Dissatisfied	2. Dissatisfied	3. Quite often
1	Chadian	>23 Years	Single	Laboratory	Forth year	Good	satisfied	1. Not at all	1. Not at all	4. Very much	4. Very much	3. A moderate amount	4. Very much	4. Very much	4. Mostly	5. Completely	4. Mostly	4. Mostly	2. A little	4. Good	4. satisfied	4. satisfied	4. satisfied	4. Satisfied	5. Very Satisfied	5. Very Satisfied	5. Very Satisfied	4. Satisfied	4. Satisfied	4. Satisfied	1. Never
2	Chadian	20 -23 years	Single	Nursing	Forth year	Neither poor nor good	Neither satisfied nor dissatisfied	1. Not at all	1. Not at all	3. A moderate amount	3. A moderate amount	2. A little	4. Very much	2. A little	3. Moderately	4. Mostly	2. A little	3. Moderately	3. Moderately	4. Good	3. Neither satisfied nor dissatisfied	5. Very Satisfied	4. satisfied	4. Satisfied	5. Very Satisfied	3. Neither satisfied nor dissatisfied	5. Very Satisfied	4. Satisfied	2. Dissatisfied	3. Neither satisfied nor dissatisfied	3. Quite often
1	Comoros	>23 Years	Married	Medicine	Fifth year	Good	satisfied	2. A little	2. A little	3. A moderate amount	4. Very much	5. An extreme amount	4. Very much	3. A moderate amount	4. Mostly	5. Completely	5. Completely	5. Completely	4. Mostly	4. Good	3. Neither satisfied nor dissatisfied	4. satisfied	4. satisfied	5. Very Satisfied	5. Very Satisfied	5. Very Satisfied	3. Neither satisfied nor dissatisfied	4. Satisfied	4. Satisfied	4. Satisfied	3. Quite often
2	Dijiboty	20 -23 years	Single	Laboratory	First year	Neither poor nor good	satisfied	1. Not at all	2. A little	1. Not at all	4. Very much	1. Not at all	1. Not at all	1. Not at all	4. Mostly	5. Completely	3. Moderately	4. Mostly	5. Completely	3. Neither poor nor good	3. Neither satisfied nor dissatisfied	3. Neither satisfied nor dissatisfied	1. Very dissatisfied	5. Very Satisfied	4. Satisfied	1. Very dissatisfied	4. Satisfied	3. Neither satisfied nor dissatisfied	1. Very dissatisfied	1. Very dissatisfied	4. Very often
2	Djiboty	>23 Years	Single	Nursing	Forth year	Neither poor nor good	Neither satisfied nor dissatisfied	1. Not at all	5. An extreme amount	3. A moderate amount	1. Not at all	3. A moderate amount	3. A moderate amount	4. Very much	4. Mostly	4. Mostly	1. Not at all	4. Mostly	3. Moderately	3. Neither poor nor good	4. satisfied	3. Neither satisfied nor dissatisfied	3. Neither satisfied nor dissatisfied	3. Neither satisfied nor dissatisfied	4. Satisfied	2. Dissatisfied	4. Satisfied	3. Neither satisfied nor dissatisfied	3. Neither satisfied nor dissatisfied	3. Neither satisfied nor dissatisfied	5. Always
1	Djibouti	>23 Years	Single	Pharmacy	Forth year	Good	satisfied	3. A moderate amount	2. A little	4. Very much	3. A moderate amount	4. Very much	2. A little	4. Very much	4. Mostly	3. Moderately	4. Mostly	1. Not at all	1. Not at all	5. Very good	5. Very Satisfied	2. Dissatisfied	1. Very dissatisfied	2. Dissatisfied	1. Very dissatisfied	4. Satisfied	2. Dissatisfied	3. Neither satisfied nor dissatisfied	4. Satisfied	5. Very Satisfied	5. Always
2	Egypt	20 -23 years	Single	Dentistry	Forth year	Good	satisfied	2. A little	2. A little	4. Very much	4. Very much	4. Very much	4. Very much	4. Very much	4. Mostly	5. Completely	3. Moderately	4. Mostly	3. Moderately	4. Good	3. Neither satisfied nor dissatisfied	4. satisfied	4. satisfied	3. Neither satisfied nor dissatisfied	4. Satisfied	4. Satisfied	4. Satisfied	4. Satisfied	3. Neither satisfied nor dissatisfied	4. Satisfied	2. Seldom
1	Eritrea	20 -23 years	Single	Dentistry	Forth year	Good	satisfied	2. A little	3. A moderate amount	4. Very much	4. Very much	4. Very much	4. Very much	4. Very much	4. Mostly	5. Completely	4. Mostly	4. Mostly	2. A little	3. Neither poor nor good	3. Neither satisfied nor dissatisfied	4. satisfied	4. satisfied	4. Satisfied	4. Satisfied	4. Satisfied	4. Satisfied	4. Satisfied	4. Satisfied	4. Satisfied	2. Seldom
2	Eritrea	20 -23 years	Single	Dentistry	Second Year	Neither poor nor good	Neither satisfied nor dissatisfied	3. A moderate amount	3. A moderate amount	3. A moderate amount	3. A moderate amount	3. A moderate amount	3. A moderate amount	3. A moderate amount	3. Moderately	2. A little	2. A little	4. Mostly	2. A little	3. Neither poor nor good	3. Neither satisfied nor dissatisfied	3. Neither satisfied nor dissatisfied	3. Neither satisfied nor dissatisfied	3. Neither satisfied nor dissatisfied	3. Neither satisfied nor dissatisfied	3. Neither satisfied nor dissatisfied	2. Dissatisfied	2. Dissatisfied	3. Neither satisfied nor dissatisfied	2. Dissatisfied
2	eritrea	>23 Years	Single	Pharmacy	Fifth year	Good	Neither satisfied nor dissatisfied	2. A little	1. Not at all	3. A moderate amount	4. Very much	3. A moderate amount	5. An extreme amount	3. A moderate amount	4. Mostly	5. Completely	3. Moderately	3. Moderately	2. A little	5. Very good	4. satisfied	4. satisfied	3. Neither satisfied nor dissatisfied	5. Very Satisfied	5. Very Satisfied	3. Neither satisfied nor dissatisfied	5. Very Satisfied	3. Neither satisfied nor dissatisfied	4. Satisfied	5. Very Satisfied	2. Seldom
2	Ertrian	20 -23 years	Single	Nursing	Forth year	Good	satisfied	1. Not at all	1. Not at all	3. A moderate amount	3. A moderate amount	3. A moderate amount	3. A moderate amount	2. A little	3. Moderately	2. A little	3. Moderately	4. Mostly	2. A little	2. Poor	4. satisfied	3. Neither satisfied nor dissatisfied	4. satisfied	4. Satisfied	1. Very dissatisfied	1. Very dissatisfied	4. Satisfied	4. Satisfied	1. Very dissatisfied	2. Dissatisfied	5. Always
2	Ertrian	20 -23 years	Single	Nursing	Forth year	Good	Neither satisfied nor dissatisfied	1. Not at all	1. Not at all	3. A moderate amount	3. A moderate amount	2. A little	2. A little	2. A little	3. Moderately	3. Moderately	1. Not at all	3. Moderately	2. A little	3. Neither poor nor good	4. satisfied	3. Neither satisfied nor dissatisfied	3. Neither satisfied nor dissatisfied	2. Dissatisfied	1. Very dissatisfied	1. Very dissatisfied	3. Neither satisfied nor dissatisfied	3. Neither satisfied nor dissatisfied	1. Very dissatisfied	1. Very dissatisfied	5. Always
1	Ethiopia	>23 Years	Single	Medicine	Forth year	Good	Neither satisfied nor dissatisfied	3. A moderate amount	3. A moderate amount	2. A little	4. Very much	3. A moderate amount	4. Very much	4. Very much	3. Moderately	4. Mostly	3. Moderately	4. Mostly	3. Moderately	3. Neither poor nor good	3. Neither satisfied nor dissatisfied	3. Neither satisfied nor dissatisfied	3. Neither satisfied nor dissatisfied	4. Satisfied	4. Satisfied	3. Neither satisfied nor dissatisfied	4. Satisfied	4. Satisfied	3. Neither satisfied nor dissatisfied	3. Neither satisfied nor dissatisfied	4. Very often
2	Ethiopian	20 -23 years	Single	Medicine	Forth year	Good	Satisfied Very	5. An extreme amount	5. An extreme amount	5. An extreme amount	5. An extreme amount	5. An extreme amount	5. An extreme amount	5. An extreme amount	5. Completely	5. Completely	5. Completely	5. Completely	5. Completely	5. Very good	5. Very Satisfied	3. Neither satisfied nor dissatisfied	4. satisfied	4. Satisfied	4. Satisfied	4. Satisfied	4. Satisfied	4. Satisfied	1. Very dissatisfied	2. Dissatisfied	4. Very often
2	Ethiopya	20 -23 years	Single	Nursing	Forth year	Good	satisfied	3. A moderate amount	3. A moderate amount	3. A moderate amount	3. A moderate amount	2. A little	2. A little	2. A little	3. Moderately	5. Completely	4. Mostly	4. Mostly	2. A little	3. Neither poor nor good	4. satisfied	3. Neither satisfied nor dissatisfied	3. Neither satisfied nor dissatisfied	2. Dissatisfied	3. Neither satisfied nor dissatisfied	3. Neither satisfied nor dissatisfied	3. Neither satisfied nor dissatisfied	3. Neither satisfied nor dissatisfied	4. Satisfied	4. Satisfied	4. Very often
1	Eyggpt	20 -23 years	Single	Dentistry	Forth year	Good	Neither satisfied nor dissatisfied	2. A little	3. A moderate amount	4. Very much	4. Very much	4. Very much	4. Very much	4. Very much	4. Mostly	5. Completely	3. Moderately	4. Mostly	2. A little	4. Good	3. Neither satisfied nor dissatisfied	4. satisfied	4. satisfied	4. Satisfied	4. Satisfied	4. Satisfied	4. Satisfied	4. Satisfied	3. Neither satisfied nor dissatisfied	4. Satisfied	3. Quite often
1	Ghana	>23 Years	Single	Medicine	Forth year	Good	satisfied	4. Very much	4. Very much	3. A moderate amount	4. Very much	3. A moderate amount	4. Very much	3. A moderate amount	3. Moderately	5. Completely	3. Moderately	4. Mostly	3. Moderately	3. Neither poor nor good	3. Neither satisfied nor dissatisfied	3. Neither satisfied nor dissatisfied	3. Neither satisfied nor dissatisfied	4. Satisfied	3. Neither satisfied nor dissatisfied	4. Satisfied	4. Satisfied	3. Neither satisfied nor dissatisfied	2. Dissatisfied	3. Neither satisfied nor dissatisfied	4. Very often
1	Ghana	>23 Years	Single	Medicine	Fifth year	Good	satisfied	3. A moderate amount	3. A moderate amount	3. A moderate amount	4. Very much	4. Very much	4. Very much	3. A moderate amount	4. Mostly	5. Completely	3. Moderately	4. Mostly	3. Moderately	3. Neither poor nor good	4. satisfied	4. satisfied	4. satisfied	5. Very Satisfied	3. Neither satisfied nor dissatisfied	3. Neither satisfied nor dissatisfied	3. Neither satisfied nor dissatisfied	4. Satisfied	4. Satisfied	3. Neither satisfied nor dissatisfied	3. Quite often
1	Ghana	>23 Years	Others	Medicine	Fifth year	Good	satisfied	4. Very much	3. A moderate amount	3. A moderate amount	5. An extreme amount	4. Very much	4. Very much	4. Very much	5. Completely	5. Completely	5. Completely	4. Mostly	3. Moderately	4. Good	4. satisfied	4. satisfied	3. Neither satisfied nor dissatisfied	5. Very Satisfied	4. Satisfied	4. Satisfied	3. Neither satisfied nor dissatisfied	5. Very Satisfied	4. Satisfied	4. Satisfied	3. Quite often
1	Ghanaian	>23 Years	Single	Dentistry	Third Year	Good	satisfied	3. A moderate amount	1. Not at all	2. A little	3. A moderate amount	3. A moderate amount	3. A moderate amount	3. A moderate amount	3. Moderately	5. Completely	2. A little	3. Moderately	3. Moderately	4. Good	4. satisfied	3. Neither satisfied nor dissatisfied	3. Neither satisfied nor dissatisfied	4. Satisfied	3. Neither satisfied nor dissatisfied	2. Dissatisfied	3. Neither satisfied nor dissatisfied	2. Dissatisfied	2. Dissatisfied	2. Dissatisfied	3. Quite often
2	Ghanaian	>23 Years	Single	Medicine	Second Year	Good	satisfied	3. A moderate amount	3. A moderate amount	3. A moderate amount	4. Very much	4. Very much	3. A moderate amount	3. A moderate amount	5. Completely	5. Completely	4. Mostly	3. Moderately	3. Moderately	4. Good	5. Very Satisfied	4. satisfied	4. satisfied	5. Very Satisfied	5. Very Satisfied	4. Satisfied	4. Satisfied	3. Neither satisfied nor dissatisfied	2. Dissatisfied	3. Neither satisfied nor dissatisfied	3. Quite often
2	Ghanaian	20 -23 years	Single	Medicine	Forth year	Good	satisfied	1. Not at all	2. A little	3. A moderate amount	3. A moderate amount	3. A moderate amount	4. Very much	2. A little	4. Mostly	5. Completely	4. Mostly	3. Moderately	2. A little	3. Neither poor nor good	4. satisfied	3. Neither satisfied nor dissatisfied	3. Neither satisfied nor dissatisfied	4. Satisfied	5. Very Satisfied	5. Very Satisfied	3. Neither satisfied nor dissatisfied	2. Dissatisfied	3. Neither satisfied nor dissatisfied	4. Satisfied	5. Always
2	Ghanaian	20 -23 years	Single	Medicine	Forth year	Good	satisfied	1. Not at all	2. A little	3. A moderate amount	3. A moderate amount	3. A moderate amount	4. Very much	2. A little	4. Mostly	5. Completely	4. Mostly	3. Moderately	2. A little	3. Neither poor nor good	4. satisfied	3. Neither satisfied nor dissatisfied	3. Neither satisfied nor dissatisfied	4. Satisfied	5. Very Satisfied	5. Very Satisfied	3. Neither satisfied nor dissatisfied	2. Dissatisfied	3. Neither satisfied nor dissatisfied	4. Satisfied	5. Always
2	Ghanaian	20 -23 years	Single	Medicine	Forth year	Good	satisfied	1. Not at all	2. A little	3. A moderate amount	3. A moderate amount	3. A moderate amount	4. Very much	2. A little	4. Mostly	5. Completely	4. Mostly	3. Moderately	2. A little	3. Neither poor nor good	4. satisfied	3. Neither satisfied nor dissatisfied	3. Neither satisfied nor dissatisfied	4. Satisfied	5. Very Satisfied	5. Very Satisfied	3. Neither satisfied nor dissatisfied	2. Dissatisfied	3. Neither satisfied nor dissatisfied	4. Satisfied	5. Always
2	Ghanaian	20 -23 years	Single	Nursing	Third Year	Neither poor nor good	Neither satisfied nor dissatisfied	4. Very much	3. A moderate amount	2. A little	3. A moderate amount	3. A moderate amount	2. A little	2. A little	3. Moderately	3. Moderately	2. A little	4. Mostly	1. Not at all	3. Neither poor nor good	4. satisfied	3. Neither satisfied nor dissatisfied	4. satisfied	4. Satisfied	2. Dissatisfied	2. Dissatisfied	2. Dissatisfied	2. Dissatisfied	3. Neither satisfied nor dissatisfied	2. Dissatisfied	3. Quite often
2	Ghanaian	>23 Years	Single	Medicine	Fifth year	Neither poor nor good	Neither satisfied nor dissatisfied	3. A moderate amount	3. A moderate amount	2. A little	3. A moderate amount	3. A moderate amount	3. A moderate amount	3. A moderate amount	3. Moderately	5. Completely	3. Moderately	4. Mostly	2. A little	3. Neither poor nor good	3. Neither satisfied nor dissatisfied	3. Neither satisfied nor dissatisfied	3. Neither satisfied nor dissatisfied	4. Satisfied	2. Dissatisfied	2. Dissatisfied	3. Neither satisfied nor dissatisfied	3. Neither satisfied nor dissatisfied	3. Neither satisfied nor dissatisfied	3. Neither satisfied nor dissatisfied	3. Quite often
2	Hamda	20 -23 years	Single	Medicine	Fifth year	Good	Satisfied Very	1. Not at all	2. A little	3. A moderate amount	3. A moderate amount	3. A moderate amount	3. A moderate amount	3. A moderate amount	3. Moderately	5. Completely	3. Moderately	3. Moderately	2. A little	4. Good	4. satisfied	4. satisfied	4. satisfied	4. Satisfied	4. Satisfied	4. Satisfied	5. Very Satisfied	4. Satisfied	4. Satisfied	4. Satisfied	4. Very often
2	India	20 -23 years	Single	Dentistry	Forth year	Good	satisfied	2. A little	2. A little	4. Very much	4. Very much	4. Very much	4. Very much	4. Very much	5. Completely	5. Completely	3. Moderately	4. Mostly	3. Moderately	4. Good	3. Neither satisfied nor dissatisfied	3. Neither satisfied nor dissatisfied	4. satisfied	5. Very Satisfied	4. Satisfied	4. Satisfied	4. Satisfied	4. Satisfied	4. Satisfied	4. Satisfied	2. Seldom
1	Keneya	< 20 years	Single	Dentistry	Second Year	Good	satisfied	3. A moderate amount	2. A little	3. A moderate amount	3. A moderate amount	2. A little	4. Very much	4. Very much	2. A little	3. Moderately	3. Moderately	2. A little	4. Mostly	3. Neither poor nor good	3. Neither satisfied nor dissatisfied	2. Dissatisfied	3. Neither satisfied nor dissatisfied	3. Neither satisfied nor dissatisfied	2. Dissatisfied	4. Satisfied	4. Satisfied	3. Neither satisfied nor dissatisfied	3. Neither satisfied nor dissatisfied	3. Neither satisfied nor dissatisfied	3. Quite often
2	Keneya	20 -23 years	Single	Medicine	Third Year	Neither poor nor good	Neither satisfied nor dissatisfied	3. A moderate amount	3. A moderate amount	3. A moderate amount	3. A moderate amount	2. A little	2. A little	4. Very much	1. Not at all	2. A little	3. Moderately	3. Moderately	3. Moderately	2. Poor	4. satisfied	2. Dissatisfied	3. Neither satisfied nor dissatisfied	3. Neither satisfied nor dissatisfied	3. Neither satisfied nor dissatisfied	3. Neither satisfied nor dissatisfied	2. Dissatisfied	3. Neither satisfied nor dissatisfied	3. Neither satisfied nor dissatisfied	2. Dissatisfied	4. Very often
1	Kenya	20 -23 years	Married	Nursing	Forth year	Very good	Satisfied Very	2. A little	2. A little	5. An extreme amount	5. An extreme amount	5. An extreme amount	4. Very much	5. An extreme amount	5. Completely	5. Completely	5. Completely	5. Completely	3. Moderately	4. Good	5. Very Satisfied	5. Very Satisfied	5 .Very Satisfied	5. Very Satisfied	5. Very Satisfied	5. Very Satisfied	4. Satisfied	5. Very Satisfied	5. Very Satisfied	5. Very Satisfied	1. Never
1	Kenya	20 -23 years	Single	Medicine	Second Year	Good	Satisfied Very	2. A little	1. Not at all	4. Very much	5. An extreme amount	5. An extreme amount	5. An extreme amount	3. A moderate amount	5. Completely	5. Completely	4. Mostly	4. Mostly	4. Mostly	4. Good	5. Very Satisfied	4. satisfied	3. Neither satisfied nor dissatisfied	5. Very Satisfied	5. Very Satisfied	5. Very Satisfied	4. Satisfied	4. Satisfied	4. Satisfied	4. Satisfied	3. Quite often
2	Kenya	>23 Years	Single	Dentistry	Fifth year	Good	satisfied	2. A little	2. A little	3. A moderate amount	3. A moderate amount	3. A moderate amount	3. A moderate amount	3. A moderate amount	4. Mostly	5. Completely	5. Completely	3. Moderately	2. A little	4. Good	5. Very Satisfied	4. satisfied	4. satisfied	4. Satisfied	5. Very Satisfied	2. Dissatisfied	1. Very dissatisfied	3. Neither satisfied nor dissatisfied	1. Very dissatisfied	4. Satisfied	4. Very often
1	Kenya	< 20 years	Divorced	Laboratory	Third Year	Neither poor nor good	Neither satisfied nor dissatisfied	2. A little	5. An extreme amount	2. A little	3. A moderate amount	3. A moderate amount	5. An extreme amount	3. A moderate amount	3. Moderately	4. Mostly	4. Mostly	3. Moderately	3. Moderately	3. Neither poor nor good	3. Neither satisfied nor dissatisfied	1. Very dissatisfied	1. Very dissatisfied	2. Dissatisfied	2. Dissatisfied	2. Dissatisfied	2. Dissatisfied	3. Neither satisfied nor dissatisfied	3. Neither satisfied nor dissatisfied	3. Neither satisfied nor dissatisfied	5. Always
1	Kenya	>23 Years	Others	Dentistry	Fifth year	Neither poor nor good	Neither satisfied nor dissatisfied	2. A little	1. Not at all	3. A moderate amount	3. A moderate amount	3. A moderate amount	3. A moderate amount	3. A moderate amount	3. Moderately	3. Moderately	3. Moderately	3. Moderately	3. Moderately	3. Neither poor nor good	3. Neither satisfied nor dissatisfied	4. satisfied	4. satisfied	3. Neither satisfied nor dissatisfied	3. Neither satisfied nor dissatisfied	2. Dissatisfied	3. Neither satisfied nor dissatisfied	3. Neither satisfied nor dissatisfied	3. Neither satisfied nor dissatisfied	3. Neither satisfied nor dissatisfied	1. Never
2	Kenyan	20 -23 years	Divorced	Pharmacy	Third Year	Very poor	Very dissatisfied	1. Not at all	4. Very much	1. Not at all	1. Not at all	3. A moderate amount	1. Not at all	3. A moderate amount	1. Not at all	3. Moderately	2. A little	2. A little	2. A little	2. Poor	2. Dissatisfied	3. Neither satisfied nor dissatisfied	2. Dissatisfied	2. Dissatisfied	3. Neither satisfied nor dissatisfied	3. Neither satisfied nor dissatisfied	2. Dissatisfied	3. Neither satisfied nor dissatisfied	3. Neither satisfied nor dissatisfied	2. Dissatisfied	5. Always
2	Kenyan	20 -23 years	Single	Pharmacy	Forth year	Very good	Satisfied Very	3. A moderate amount	3. A moderate amount	4. Very much	5. An extreme amount	5. An extreme amount	4. Very much	3. A moderate amount	2. A little	1. Not at all	4. Mostly	4. Mostly	3. Moderately	3. Neither poor nor good	5. Very Satisfied	4. satisfied	4. satisfied	5. Very Satisfied	5. Very Satisfied	5. Very Satisfied	5. Very Satisfied	4. Satisfied	4. Satisfied	4. Satisfied	4. Very often
1	Kenyan	>23 Years	Single	Medicine	Forth year	Very good	Satisfied Very	3. A moderate amount	1. Not at all	4. Very much	4. Very much	4. Very much	4. Very much	4. Very much	4. Mostly	5. Completely	5. Completely	4. Mostly	3. Moderately	4. Good	3. Neither satisfied nor dissatisfied	4. satisfied	4. satisfied	4. Satisfied	4. Satisfied	3. Neither satisfied nor dissatisfied	4. Satisfied	4. Satisfied	4. Satisfied	4. Satisfied	4. Very often
2	Kenyan	>23 Years	Single	Dentistry	Forth year	Very good	Satisfied Very	1. Not at all	1. Not at all	5. An extreme amount	5. An extreme amount	4. Very much	4. Very much	5. An extreme amount	4. Mostly	5. Completely	4. Mostly	4. Mostly	4. Mostly	4. Good	5. Very Satisfied	4. satisfied	3. Neither satisfied nor dissatisfied	5. Very Satisfied	4. Satisfied	3. Neither satisfied nor dissatisfied	5. Very Satisfied	5. Very Satisfied	3. Neither satisfied nor dissatisfied	4. Satisfied	1. Never
2	Kenyan	>23 Years	Single	Dentistry	Forth year	Very good	Satisfied Very	1. Not at all	1. Not at all	5. An extreme amount	5. An extreme amount	4. Very much	4. Very much	5. An extreme amount	4. Mostly	5. Completely	4. Mostly	4. Mostly	4. Mostly	4. Good	5. Very Satisfied	4. satisfied	3. Neither satisfied nor dissatisfied	5. Very Satisfied	4. Satisfied	3. Neither satisfied nor dissatisfied	5. Very Satisfied	5. Very Satisfied	3. Neither satisfied nor dissatisfied	4. Satisfied	1. Never
1	Kenyan	>23 Years	Single	Pharmacy	Fifth year	Good	Satisfied Very	2. A little	2. A little	4. Very much	1. Not at all	4. Very much	4. Very much	4. Very much	5. Completely	5. Completely	5. Completely	4. Mostly	4. Mostly	4. Good	4. satisfied	5. Very Satisfied	5 .Very Satisfied	5. Very Satisfied	5. Very Satisfied	5. Very Satisfied	4. Satisfied	4. Satisfied	4. Satisfied	4. Satisfied	1. Never
2	Kenyan	20 -23 years	Single	Nursing	Third Year	Very good	satisfied	1. Not at all	3. A moderate amount	4. Very much	4. Very much	5. An extreme amount	4. Very much	4. Very much	5. Completely	5. Completely	3. Moderately	5. Completely	3. Moderately	5. Very good	4. satisfied	4. satisfied	5 .Very Satisfied	5. Very Satisfied	5. Very Satisfied	3. Neither satisfied nor dissatisfied	4. Satisfied	5. Very Satisfied	5. Very Satisfied	5. Very Satisfied	1. Never
2	Kenyan	>23 Years	Single	Nursing	Forth year	Poor	satisfied	2. A little	1. Not at all	2. A little	3. A moderate amount	2. A little	3. A moderate amount	5. An extreme amount	3. Moderately	2. A little	2. A little	5. Completely	2. A little	3. Neither poor nor good	4. satisfied	2. Dissatisfied	4. satisfied	4. Satisfied	1. Very dissatisfied	1. Very dissatisfied	1. Very dissatisfied	4. Satisfied	2. Dissatisfied	4. Satisfied	5. Always
2	Kenyan	20 -23 years	Single	Pharmacy	Fifth year	Neither poor nor good	satisfied	3. A moderate amount	3. A moderate amount	3. A moderate amount	3. A moderate amount	3. A moderate amount	3. A moderate amount	2. A little	4. Mostly	3. Moderately	3. Moderately	3. Moderately	3. Moderately	3. Neither poor nor good	4. satisfied	3. Neither satisfied nor dissatisfied	3. Neither satisfied nor dissatisfied	4. Satisfied	3. Neither satisfied nor dissatisfied	3. Neither satisfied nor dissatisfied	4. Satisfied	3. Neither satisfied nor dissatisfied	3. Neither satisfied nor dissatisfied	4. Satisfied	3. Quite often
2	Kenyan	20 -23 years	Single	Nursing	Third Year	Good	satisfied	2. A little	3. A moderate amount	4. Very much	5. An extreme amount	4. Very much	4. Very much	3. A moderate amount	3. Moderately	4. Mostly	3. Moderately	4. Mostly	3. Moderately	4. Good	4. satisfied	4. satisfied	4. satisfied	4. Satisfied	4. Satisfied	4. Satisfied	5. Very Satisfied	4. Satisfied	4. Satisfied	2. Dissatisfied	2. Seldom
2	Kenyan	20 -23 years	Single	Medicine	Third Year	Good	satisfied	3. A moderate amount	3. A moderate amount	3. A moderate amount	4. Very much	4. Very much	4. Very much	4. Very much	3. Moderately	3. Moderately	4. Mostly	4. Mostly	4. Mostly	4. Good	4. satisfied	4. satisfied	4. satisfied	4. Satisfied	4. Satisfied	4. Satisfied	4. Satisfied	4. Satisfied	4. Satisfied	4. Satisfied	1. Never
1	Kenyan	>23 Years	Single	Medicine	Third Year	Good	satisfied	1. Not at all	1. Not at all	4. Very much	5. An extreme amount	4. Very much	4. Very much	3. A moderate amount	4. Mostly	3. Moderately	4. Mostly	4. Mostly	3. Moderately	4. Good	4. satisfied	3. Neither satisfied nor dissatisfied	3. Neither satisfied nor dissatisfied	4. Satisfied	5. Very Satisfied	3. Neither satisfied nor dissatisfied	4. Satisfied	4. Satisfied	4. Satisfied	4. Satisfied	2. Seldom
1	Kenyan	20 -23 years	Single	Medicine	Second Year	Good	satisfied	3. A moderate amount	2. A little	3. A moderate amount	3. A moderate amount	3. A moderate amount	3. A moderate amount	3. A moderate amount	3. Moderately	4. Mostly	3. Moderately	3. Moderately	2. A little	3. Neither poor nor good	2. Dissatisfied	2. Dissatisfied	3. Neither satisfied nor dissatisfied	3. Neither satisfied nor dissatisfied	3. Neither satisfied nor dissatisfied	2. Dissatisfied	3. Neither satisfied nor dissatisfied	3. Neither satisfied nor dissatisfied	3. Neither satisfied nor dissatisfied	4. Satisfied	3. Quite often
2	Kenyan	20 -23 years	Single	Pharmacy	Forth year	Good	satisfied	3. A moderate amount	1. Not at all	4. Very much	5. An extreme amount	3. A moderate amount	4. Very much	3. A moderate amount	4. Mostly	5. Completely	4. Mostly	3. Moderately	2. A little	3. Neither poor nor good	2. Dissatisfied	4. satisfied	4. satisfied	4. Satisfied	4. Satisfied	4. Satisfied	4. Satisfied	4. Satisfied	4. Satisfied	4. Satisfied	2. Seldom
2	Kenyan	20 -23 years	Single	Pharmacy	Forth year	Good	satisfied	3. A moderate amount	1. Not at all	4. Very much	5. An extreme amount	3. A moderate amount	4. Very much	3. A moderate amount	4. Mostly	5. Completely	4. Mostly	3. Moderately	2. A little	3. Neither poor nor good	2. Dissatisfied	4. satisfied	4. satisfied	4. Satisfied	4. Satisfied	4. Satisfied	4. Satisfied	4. Satisfied	4. Satisfied	4. Satisfied	2. Seldom
2	Kenyan	>23 Years	Single	Pharmacy	Forth year	Good	satisfied	1. Not at all	2. A little	3. A moderate amount	3. A moderate amount	2. A little	4. Very much	3. A moderate amount	2. A little	5. Completely	5. Completely	4. Mostly	2. A little	4. Good	5. Very Satisfied	4. satisfied	3. Neither satisfied nor dissatisfied	2. Dissatisfied	4. Satisfied	1. Very dissatisfied	4. Satisfied	3. Neither satisfied nor dissatisfied	2. Dissatisfied	3. Neither satisfied nor dissatisfied	3. Quite often
2	Kenyan	>23 Years	Single	Pharmacy	Forth year	Good	satisfied	4. Very much	3. A moderate amount	3. A moderate amount	5. An extreme amount	3. A moderate amount	4. Very much	3. A moderate amount	4. Mostly	5. Completely	5. Completely	3. Moderately	3. Moderately	4. Good	4. satisfied	3. Neither satisfied nor dissatisfied	2. Dissatisfied	4. Satisfied	4. Satisfied	3. Neither satisfied nor dissatisfied	4. Satisfied	4. Satisfied	4. Satisfied	5. Very Satisfied	2. Seldom
2	Kenyan	20 -23 years	Single	Nursing	Forth year	Good	satisfied	3. A moderate amount	3. A moderate amount	3. A moderate amount	4. Very much	3. A moderate amount	3. A moderate amount	4. Very much	4. Mostly	4. Mostly	2. A little	3. Moderately	3. Moderately	4. Good	5. Very Satisfied	4. satisfied	4. satisfied	5. Very Satisfied	4. Satisfied	5. Very Satisfied	2. Dissatisfied	4. Satisfied	2. Dissatisfied	4. Satisfied	1. Never
2	Kenyan	20 -23 years	Single	Nursing	Forth year	Good	satisfied	1. Not at all	1. Not at all	5. An extreme amount	5. An extreme amount	3. A moderate amount	3. A moderate amount	3. A moderate amount	5. Completely	4. Mostly	5. Completely	5. Completely	4. Mostly	3. Neither poor nor good	5. Very Satisfied	5. Very Satisfied	5 .Very Satisfied	5. Very Satisfied	3. Neither satisfied nor dissatisfied	5. Very Satisfied	4. Satisfied	5. Very Satisfied	5. Very Satisfied	4. Satisfied	4. Very often
2	kenyan	>23 Years	Single	Nursing	Forth year	Good	satisfied	2. A little	2. A little	3. A moderate amount	4. Very much	3. A moderate amount	4. Very much	5. An extreme amount	4. Mostly	5. Completely	3. Moderately	3. Moderately	3. Moderately	3. Neither poor nor good	3. Neither satisfied nor dissatisfied	4. satisfied	4. satisfied	3. Neither satisfied nor dissatisfied	4. Satisfied	1. Very dissatisfied	2. Dissatisfied	4. Satisfied	3. Neither satisfied nor dissatisfied	4. Satisfied	3. Quite often
1	kenyan	20 -23 years	Single	Medicine	Forth year	Good	satisfied	2. A little	1. Not at all	4. Very much	4. Very much	3. A moderate amount	4. Very much	5. An extreme amount	4. Mostly	5. Completely	4. Mostly	4. Mostly	3. Moderately	4. Good	3. Neither satisfied nor dissatisfied	4. satisfied	4. satisfied	4. Satisfied	4. Satisfied	3. Neither satisfied nor dissatisfied	5. Very Satisfied	4. Satisfied	3. Neither satisfied nor dissatisfied	4. Satisfied	2. Seldom
1	Kenyan	< 20 years	Single	Medicine	First year	Good	satisfied	1. Not at all	1. Not at all	4. Very much	4. Very much	3. A moderate amount	3. A moderate amount	4. Very much	4. Mostly	3. Moderately	3. Moderately	4. Mostly	4. Mostly	4. Good	4. satisfied	4. satisfied	3. Neither satisfied nor dissatisfied	4. Satisfied	4. Satisfied	2. Dissatisfied	4. Satisfied	3. Neither satisfied nor dissatisfied	2. Dissatisfied	3. Neither satisfied nor dissatisfied	2. Seldom
1	Kenyan	< 20 years	Single	Medicine	First year	Good	satisfied	1. Not at all	1. Not at all	4. Very much	4. Very much	3. A moderate amount	3. A moderate amount	4. Very much	4. Mostly	3. Moderately	3. Moderately	4. Mostly	4. Mostly	4. Good	4. satisfied	4. satisfied	3. Neither satisfied nor dissatisfied	4. Satisfied	4. Satisfied	2. Dissatisfied	4. Satisfied	3. Neither satisfied nor dissatisfied	2. Dissatisfied	3. Neither satisfied nor dissatisfied	2. Seldom
1	Kenyan	< 20 years	Single	Medicine	First year	Good	satisfied	1. Not at all	1. Not at all	4. Very much	4. Very much	3. A moderate amount	3. A moderate amount	4. Very much	4. Mostly	3. Moderately	3. Moderately	4. Mostly	4. Mostly	4. Good	4. satisfied	4. satisfied	3. Neither satisfied nor dissatisfied	4. Satisfied	4. Satisfied	2. Dissatisfied	4. Satisfied	3. Neither satisfied nor dissatisfied	2. Dissatisfied	3. Neither satisfied nor dissatisfied	2. Seldom
1	Kenyan	>23 Years	Married	Pharmacy	Fifth year	Good	satisfied	2. A little	2. A little	4. Very much	3. A moderate amount	2. A little	3. A moderate amount	2. A little	4. Mostly	4. Mostly	4. Mostly	3. Moderately	3. Moderately	3. Neither poor nor good	3. Neither satisfied nor dissatisfied	4. satisfied	4. satisfied	4. Satisfied	4. Satisfied	4. Satisfied	4. Satisfied	4. Satisfied	3. Neither satisfied nor dissatisfied	4. Satisfied	2. Seldom
1	Kenyan	>23 Years	Single	Medicine	Forth year	Poor	Neither satisfied nor dissatisfied	4. Very much	4. Very much	2. A little	3. A moderate amount	3. A moderate amount	3. A moderate amount	2. A little	2. A little	4. Mostly	1. Not at all	2. A little	1. Not at all	2. Poor	2. Dissatisfied	2. Dissatisfied	2. Dissatisfied	3. Neither satisfied nor dissatisfied	2. Dissatisfied	1. Very dissatisfied	3. Neither satisfied nor dissatisfied	1. Very dissatisfied	2. Dissatisfied	2. Dissatisfied	4. Very often
1	Kenyan	20 -23 years	Single	Nursing	Third Year	Neither poor nor good	Neither satisfied nor dissatisfied	4. Very much	3. A moderate amount	3. A moderate amount	4. Very much	5. An extreme amount	4. Very much	4. Very much	3. Moderately	1. Not at all	4. Mostly	3. Moderately	3. Moderately	5. Very good	3. Neither satisfied nor dissatisfied	4. satisfied	4. satisfied	4. Satisfied	3. Neither satisfied nor dissatisfied	3. Neither satisfied nor dissatisfied	3. Neither satisfied nor dissatisfied	4. Satisfied	4. Satisfied	3. Neither satisfied nor dissatisfied	3. Quite often
2	Kenyan	20 -23 years	Single	Medicine	Third Year	Neither poor nor good	Neither satisfied nor dissatisfied	3. A moderate amount	4. Very much	3. A moderate amount	4. Very much	3. A moderate amount	3. A moderate amount	3. A moderate amount	3. Moderately	4. Mostly	2. A little	5. Completely	3. Moderately	3. Neither poor nor good	3. Neither satisfied nor dissatisfied	3. Neither satisfied nor dissatisfied	3. Neither satisfied nor dissatisfied	3. Neither satisfied nor dissatisfied	3. Neither satisfied nor dissatisfied	3. Neither satisfied nor dissatisfied	3. Neither satisfied nor dissatisfied	3. Neither satisfied nor dissatisfied	3. Neither satisfied nor dissatisfied	2. Dissatisfied	4. Very often
2	Kenyan	>23 Years	Single	Nursing	Forth year	Neither poor nor good	Neither satisfied nor dissatisfied	4. Very much	3. A moderate amount	2. A little	1. Not at all	1. Not at all	1. Not at all	2. A little	1. Not at all	1. Not at all	1. Not at all	3. Moderately	1. Not at all	1. Very poor	2. Dissatisfied	3. Neither satisfied nor dissatisfied	2. Dissatisfied	2. Dissatisfied	3. Neither satisfied nor dissatisfied	3. Neither satisfied nor dissatisfied	1. Very dissatisfied	2. Dissatisfied	1. Very dissatisfied	1. Very dissatisfied	5. Always
2	Kenyan	>23 Years	Single	Nursing	Forth year	Neither poor nor good	Neither satisfied nor dissatisfied	4. Very much	3. A moderate amount	3. A moderate amount	5. An extreme amount	4. Very much	3. A moderate amount	2. A little	3. Moderately	5. Completely	2. A little	4. Mostly	3. Moderately	3. Neither poor nor good	2. Dissatisfied	3. Neither satisfied nor dissatisfied	4. satisfied	4. Satisfied	3. Neither satisfied nor dissatisfied	3. Neither satisfied nor dissatisfied	2. Dissatisfied	2. Dissatisfied	3. Neither satisfied nor dissatisfied	3. Neither satisfied nor dissatisfied	5. Always
2	Kenyan	20 -23 years	Single	Medicine	Forth year	Neither poor nor good	Neither satisfied nor dissatisfied	1. Not at all	4. Very much	2. A little	5. An extreme amount	3. A moderate amount	2. A little	2. A little	3. Moderately	2. A little	1. Not at all	2. A little	2. A little	3. Neither poor nor good	5. Very Satisfied	3. Neither satisfied nor dissatisfied	3. Neither satisfied nor dissatisfied	4. Satisfied	4. Satisfied	4. Satisfied	3. Neither satisfied nor dissatisfied	3. Neither satisfied nor dissatisfied	3. Neither satisfied nor dissatisfied	3. Neither satisfied nor dissatisfied	2. Seldom
2	Kenyan	20 -23 years	Single	Medicine	Forth year	Neither poor nor good	Neither satisfied nor dissatisfied	1. Not at all	4. Very much	2. A little	3. A moderate amount	2. A little	2. A little	2. A little	2. A little	3. Moderately	1. Not at all	2. A little	2. A little	3. Neither poor nor good	4. satisfied	3. Neither satisfied nor dissatisfied	3. Neither satisfied nor dissatisfied	4. Satisfied	4. Satisfied	4. Satisfied	3. Neither satisfied nor dissatisfied	3. Neither satisfied nor dissatisfied	3. Neither satisfied nor dissatisfied	3. Neither satisfied nor dissatisfied	2. Seldom
2	Kenyan	20 -23 years	Single	Medicine	Forth year	Neither poor nor good	Neither satisfied nor dissatisfied	2. A little	4. Very much	2. A little	2. A little	2. A little	2. A little	2. A little	2. A little	2. A little	1. Not at all	2. A little	2. A little	3. Neither poor nor good	4. satisfied	3. Neither satisfied nor dissatisfied	3. Neither satisfied nor dissatisfied	4. Satisfied	3. Neither satisfied nor dissatisfied	4. Satisfied	3. Neither satisfied nor dissatisfied	3. Neither satisfied nor dissatisfied	3. Neither satisfied nor dissatisfied	3. Neither satisfied nor dissatisfied	2. Seldom
2	Kenyan	20 -23 years	Single	Medicine	Forth year	Neither poor nor good	Neither satisfied nor dissatisfied	4. Very much	3. A moderate amount	3. A moderate amount	4. Very much	4. Very much	3. A moderate amount	2. A little	4. Mostly	5. Completely	3. Moderately	4. Mostly	2. A little	3. Neither poor nor good	3. Neither satisfied nor dissatisfied	3. Neither satisfied nor dissatisfied	3. Neither satisfied nor dissatisfied	4. Satisfied	4. Satisfied	3. Neither satisfied nor dissatisfied	4. Satisfied	3. Neither satisfied nor dissatisfied	3. Neither satisfied nor dissatisfied	3. Neither satisfied nor dissatisfied	3. Quite often
1	Kenyan	>23 Years	Single	Medicine	Forth year	Neither poor nor good	Neither satisfied nor dissatisfied	2. A little	2. A little	2. A little	4. Very much	4. Very much	4. Very much	2. A little	3. Moderately	4. Mostly	1. Not at all	4. Mostly	2. A little	2. Poor	2. Dissatisfied	3. Neither satisfied nor dissatisfied	3. Neither satisfied nor dissatisfied	4. Satisfied	3. Neither satisfied nor dissatisfied	2. Dissatisfied	3. Neither satisfied nor dissatisfied	2. Dissatisfied	3. Neither satisfied nor dissatisfied	3. Neither satisfied nor dissatisfied	5. Always
2	Kenyan	20 -23 years	Single	Medicine	Third Year	Good	Neither satisfied nor dissatisfied	4. Very much	4. Very much	2. A little	3. A moderate amount	3. A moderate amount	3. A moderate amount	3. A moderate amount	3. Moderately	5. Completely	3. Moderately	5. Completely	3. Moderately	3. Neither poor nor good	2. Dissatisfied	3. Neither satisfied nor dissatisfied	3. Neither satisfied nor dissatisfied	5. Very Satisfied	3. Neither satisfied nor dissatisfied	3. Neither satisfied nor dissatisfied	4. Satisfied	3. Neither satisfied nor dissatisfied	3. Neither satisfied nor dissatisfied	3. Neither satisfied nor dissatisfied	4. Very often
1	Kenyan	>23 Years	Single	Medicine	Fifth year	Good	Neither satisfied nor dissatisfied	3. A moderate amount	2. A little	3. A moderate amount	1. Not at all	3. A moderate amount	2. A little	1. Not at all	1. Not at all	3. Moderately	3. Moderately	3. Moderately	3. Moderately	2. Poor	1. Very dissatisfied	1. Very dissatisfied	2. Dissatisfied	3. Neither satisfied nor dissatisfied	2. Dissatisfied	3. Neither satisfied nor dissatisfied	2. Dissatisfied	2. Dissatisfied	2. Dissatisfied	3. Neither satisfied nor dissatisfied	3. Quite often
1	Kenyan	>23 Years	Single	Medicine	Fifth year	Good	Neither satisfied nor dissatisfied	3. A moderate amount	2. A little	3. A moderate amount	1. Not at all	3. A moderate amount	2. A little	1. Not at all	1. Not at all	3. Moderately	3. Moderately	3. Moderately	3. Moderately	2. Poor	1. Very dissatisfied	1. Very dissatisfied	2. Dissatisfied	3. Neither satisfied nor dissatisfied	2. Dissatisfied	3. Neither satisfied nor dissatisfied	2. Dissatisfied	2. Dissatisfied	2. Dissatisfied	3. Neither satisfied nor dissatisfied	3. Quite often
2	Kenyan	>23 Years	Single	Medicine	Fifth year	Good	Dissatisfied	3. A moderate amount	3. A moderate amount	3. A moderate amount	4. Very much	3. A moderate amount	3. A moderate amount	3. A moderate amount	2. A little	5. Completely	4. Mostly	4. Mostly	3. Moderately	4. Good	2. Dissatisfied	2. Dissatisfied	2. Dissatisfied	4. Satisfied	4. Satisfied	5. Very Satisfied	4. Satisfied	4. Satisfied	4. Satisfied	4. Satisfied	4. Very often
2	Liberian	>23 Years	Single	Nursing	Forth year	Good	satisfied	1. Not at all	1. Not at all	4. Very much	4. Very much	3. A moderate amount	4. Very much	2. A little	4. Mostly	4. Mostly	3. Moderately	2. A little	4. Mostly	4. Good	4. satisfied	4. satisfied	4. satisfied	5. Very Satisfied	5. Very Satisfied	2. Dissatisfied	3. Neither satisfied nor dissatisfied	3. Neither satisfied nor dissatisfied	4. Satisfied	4. Satisfied	5. Always
2	Malawi	20 -23 years	Single	Medicine	Third Year	Neither poor nor good	satisfied	4. Very much	3. A moderate amount	3. A moderate amount	4. Very much	4. Very much	4. Very much	3. A moderate amount	4. Mostly	5. Completely	3. Moderately	5. Completely	3. Moderately	3. Neither poor nor good	3. Neither satisfied nor dissatisfied	3. Neither satisfied nor dissatisfied	3. Neither satisfied nor dissatisfied	5. Very Satisfied	4. Satisfied	3. Neither satisfied nor dissatisfied	3. Neither satisfied nor dissatisfied	3. Neither satisfied nor dissatisfied	3. Neither satisfied nor dissatisfied	2. Dissatisfied	3. Quite often
2	Malawi	>23 Years	Single	Nursing	Forth year	Good	satisfied	2. A little	1. Not at all	2. A little	4. Very much	3. A moderate amount	4. Very much	3. A moderate amount	3. Moderately	5. Completely	1. Not at all	3. Moderately	3. Moderately	4. Good	2. Dissatisfied	4. satisfied	4. satisfied	4. Satisfied	2. Dissatisfied	3. Neither satisfied nor dissatisfied	4. Satisfied	1. Very dissatisfied	2. Dissatisfied	2. Dissatisfied	3. Quite often
2	Malawian	>23 Years	Single	Nursing	Forth year	Good	satisfied	3. A moderate amount	2. A little	3. A moderate amount	3. A moderate amount	4. Very much	4. Very much	3. A moderate amount	4. Mostly	5. Completely	3. Moderately	3. Moderately	3. Moderately	3. Neither poor nor good	5. Very Satisfied	4. satisfied	4. satisfied	5. Very Satisfied	4. Satisfied	4. Satisfied	4. Satisfied	3. Neither satisfied nor dissatisfied	3. Neither satisfied nor dissatisfied	3. Neither satisfied nor dissatisfied	2. Seldom
2	Merhaba	20 -23 years	Single	Nursing	Second Year	Very poor	Very dissatisfied	2. A little	1. Not at all	1. Not at all	1. Not at all	1. Not at all	2. A little	2. A little	2. A little	2. A little	2. A little	2. A little	2. A little	1. Very poor	4. satisfied	1. Very dissatisfied	1. Very dissatisfied	1. Very dissatisfied	4. Satisfied	2. Dissatisfied	5. Very Satisfied	1. Very dissatisfied	3. Neither satisfied nor dissatisfied	5. Very Satisfied	1. Never
1	Mozambique	>23 Years	Single	Laboratory	Third Year	Good	satisfied	2. A little	2. A little	4. Very much	5. An extreme amount	4. Very much	3. A moderate amount	4. Very much	5. Completely	5. Completely	3. Moderately	4. Mostly	3. Moderately	5. Very good	5. Very Satisfied	4. satisfied	5 .Very Satisfied	4. Satisfied	5. Very Satisfied	3. Neither satisfied nor dissatisfied	4. Satisfied	5. Very Satisfied	4. Satisfied	4. Satisfied	2. Seldom
2	Nigeria	20 -23 years	Single	Laboratory	Third Year	Very good	Satisfied Very	1. Not at all	4. Very much	4. Very much	5. An extreme amount	5. An extreme amount	3. A moderate amount	2. A little	3. Moderately	2. A little	4. Mostly	3. Moderately	2. A little	4. Good	3. Neither satisfied nor dissatisfied	3. Neither satisfied nor dissatisfied	3. Neither satisfied nor dissatisfied	3. Neither satisfied nor dissatisfied	3. Neither satisfied nor dissatisfied	3. Neither satisfied nor dissatisfied	3. Neither satisfied nor dissatisfied	3. Neither satisfied nor dissatisfied	3. Neither satisfied nor dissatisfied	3. Neither satisfied nor dissatisfied	3. Quite often
2	Nigeria	20 -23 years	Single	Nursing	Forth year	Very good	Satisfied Very	1. Not at all	3. A moderate amount	4. Very much	4. Very much	4. Very much	4. Very much	5. An extreme amount	4. Mostly	5. Completely	4. Mostly	1. Not at all	2. A little	4. Good	2. Dissatisfied	3. Neither satisfied nor dissatisfied	4. satisfied	4. Satisfied	3. Neither satisfied nor dissatisfied	2. Dissatisfied	5. Very Satisfied	4. Satisfied	2. Dissatisfied	3. Neither satisfied nor dissatisfied	3. Quite often
2	Nigeria	20 -23 years	Single	Nursing	Fifth year	Very good	Satisfied Very	4. Very much	4. Very much	4. Very much	4. Very much	4. Very much	4. Very much	4. Very much	5. Completely	5. Completely	4. Mostly	5. Completely	5. Completely	4. Good	5. Very Satisfied	5. Very Satisfied	5 .Very Satisfied	5. Very Satisfied	5. Very Satisfied	5. Very Satisfied	5. Very Satisfied	5. Very Satisfied	5. Very Satisfied	5. Very Satisfied	5. Always
2	Nigeria	20 -23 years	Single	Laboratory	Second Year	Good	Satisfied Very	5. An extreme amount	3. A moderate amount	5. An extreme amount	5. An extreme amount	3. A moderate amount	5. An extreme amount	3. A moderate amount	5. Completely	5. Completely	3. Moderately	5. Completely	3. Moderately	5. Very good	5. Very Satisfied	5. Very Satisfied	4. satisfied	5. Very Satisfied	4. Satisfied	3. Neither satisfied nor dissatisfied	4. Satisfied	3. Neither satisfied nor dissatisfied	4. Satisfied	4. Satisfied	3. Quite often
2	Nigeria	20 -23 years	Single	Medicine	Second Year	Very good	satisfied	3. A moderate amount	3. A moderate amount	3. A moderate amount	4. Very much	3. A moderate amount	3. A moderate amount	2. A little	3. Moderately	3. Moderately	2. A little	2. A little	3. Moderately	3. Neither poor nor good	3. Neither satisfied nor dissatisfied	3. Neither satisfied nor dissatisfied	3. Neither satisfied nor dissatisfied	3. Neither satisfied nor dissatisfied	3. Neither satisfied nor dissatisfied	3. Neither satisfied nor dissatisfied	3. Neither satisfied nor dissatisfied	3. Neither satisfied nor dissatisfied	3. Neither satisfied nor dissatisfied	3. Neither satisfied nor dissatisfied	3. Quite often
2	Nigeria	>23 Years	Single	Medicine	Second Year	Very good	satisfied	3. A moderate amount	2. A little	4. Very much	4. Very much	2. A little	4. Very much	3. A moderate amount	4. Mostly	5. Completely	3. Moderately	4. Mostly	3. Moderately	4. Good	4. satisfied	4. satisfied	4. satisfied	5. Very Satisfied	4. Satisfied	4. Satisfied	5. Very Satisfied	4. Satisfied	3. Neither satisfied nor dissatisfied	4. Satisfied	3. Quite often
1	Nigeria	>23 Years	Single	Nursing	Forth year	Neither poor nor good	satisfied	2. A little	4. Very much	2. A little	5. An extreme amount	2. A little	2. A little	4. Very much	4. Mostly	5. Completely	2. A little	2. A little	2. A little	4. Good	4. satisfied	5. Very Satisfied	4. satisfied	5. Very Satisfied	5. Very Satisfied	1. Very dissatisfied	3. Neither satisfied nor dissatisfied	3. Neither satisfied nor dissatisfied	3. Neither satisfied nor dissatisfied	2. Dissatisfied	1. Never
2	Nigeria	>23 Years	Single	Nursing	Third Year	Good	satisfied	3. A moderate amount	4. Very much	4. Very much	5. An extreme amount	4. Very much	5. An extreme amount	4. Very much	4. Mostly	2. A little	2. A little	4. Mostly	3. Moderately	4. Good	5. Very Satisfied	4. satisfied	3. Neither satisfied nor dissatisfied	5. Very Satisfied	4. Satisfied	2. Dissatisfied	4. Satisfied	4. Satisfied	3. Neither satisfied nor dissatisfied	4. Satisfied	3. Quite often
1	Nigeria	>23 Years	Single	Medicine	Forth year	Good	satisfied	2. A little	2. A little	3. A moderate amount	4. Very much	4. Very much	4. Very much	3. A moderate amount	4. Mostly	5. Completely	3. Moderately	5. Completely	3. Moderately	4. Good	4. satisfied	4. satisfied	4. satisfied	5. Very Satisfied	3. Neither satisfied nor dissatisfied	3. Neither satisfied nor dissatisfied	3. Neither satisfied nor dissatisfied	3. Neither satisfied nor dissatisfied	3. Neither satisfied nor dissatisfied	3. Neither satisfied nor dissatisfied	3. Quite often
1	Nigeria	>23 Years	Single	Medicine	Forth year	Good	satisfied	2. A little	2. A little	3. A moderate amount	4. Very much	4. Very much	4. Very much	3. A moderate amount	4. Mostly	5. Completely	3. Moderately	5. Completely	3. Moderately	4. Good	4. satisfied	4. satisfied	4. satisfied	5. Very Satisfied	3. Neither satisfied nor dissatisfied	3. Neither satisfied nor dissatisfied	3. Neither satisfied nor dissatisfied	3. Neither satisfied nor dissatisfied	3. Neither satisfied nor dissatisfied	3. Neither satisfied nor dissatisfied	3. Quite often
1	Nigeria	>23 Years	Single	Medicine	Forth year	Good	satisfied	2. A little	2. A little	3. A moderate amount	4. Very much	4. Very much	4. Very much	3. A moderate amount	4. Mostly	5. Completely	3. Moderately	5. Completely	3. Moderately	4. Good	4. satisfied	4. satisfied	4. satisfied	5. Very Satisfied	3. Neither satisfied nor dissatisfied	3. Neither satisfied nor dissatisfied	3. Neither satisfied nor dissatisfied	3. Neither satisfied nor dissatisfied	3. Neither satisfied nor dissatisfied	3. Neither satisfied nor dissatisfied	3. Quite often
1	Nigeria	20 -23 years	Single	Nursing	First year	Good	satisfied	2. A little	2. A little	2. A little	4. Very much	5. An extreme amount	3. A moderate amount	4. Very much	3. Moderately	4. Mostly	4. Mostly	4. Mostly	5. Completely	4. Good	4. satisfied	4. satisfied	4. satisfied	4. Satisfied	4. Satisfied	4. Satisfied	4. Satisfied	4. Satisfied	4. Satisfied	4. Satisfied	3. Quite often
2	Nigeria	>23 Years	Married	Laboratory	First year	Good	satisfied	4. Very much	4. Very much	4. Very much	4. Very much	4. Very much	4. Very much	4. Very much	4. Mostly	4. Mostly	2. A little	2. A little	2. A little	4. Good	4. satisfied	4. satisfied	4. satisfied	4. Satisfied	5. Very Satisfied	5. Very Satisfied	4. Satisfied	4. Satisfied	4. Satisfied	4. Satisfied	1. Never
1	Nigeria	>23 Years	Single	Medicine	Fifth year	Good	satisfied	1. Not at all	3. A moderate amount	3. A moderate amount	4. Very much	3. A moderate amount	3. A moderate amount	2. A little	4. Mostly	4. Mostly	3. Moderately	4. Mostly	3. Moderately	3. Neither poor nor good	4. satisfied	3. Neither satisfied nor dissatisfied	4. satisfied	4. Satisfied	2. Dissatisfied	2. Dissatisfied	4. Satisfied	2. Dissatisfied	2. Dissatisfied	3. Neither satisfied nor dissatisfied	2. Seldom
2	Nigeria	20 -23 years	Single	Medicine	Third Year	Poor	Neither satisfied nor dissatisfied	2. A little	3. A moderate amount	2. A little	3. A moderate amount	2. A little	1. Not at all	2. A little	2. A little	3. Moderately	2. A little	4. Mostly	1. Not at all	3. Neither poor nor good	4. satisfied	2. Dissatisfied	2. Dissatisfied	2. Dissatisfied	2. Dissatisfied	1. Very dissatisfied	4. Satisfied	1. Very dissatisfied	2. Dissatisfied	1. Very dissatisfied	4. Very often
1	Nigeria	>23 Years	Single	Medicine	Forth year	Neither poor nor good	Neither satisfied nor dissatisfied	3. A moderate amount	3. A moderate amount	3. A moderate amount	3. A moderate amount	3. A moderate amount	2. A little	3. A moderate amount	3. Moderately	3. Moderately	3. Moderately	3. Moderately	3. Moderately	3. Neither poor nor good	3. Neither satisfied nor dissatisfied	3. Neither satisfied nor dissatisfied	3. Neither satisfied nor dissatisfied	3. Neither satisfied nor dissatisfied	3. Neither satisfied nor dissatisfied	3. Neither satisfied nor dissatisfied	3. Neither satisfied nor dissatisfied	3. Neither satisfied nor dissatisfied	3. Neither satisfied nor dissatisfied	3. Neither satisfied nor dissatisfied	5. Always
1	Nigeria	>23 Years	Single	Medicine	Forth year	Neither poor nor good	Neither satisfied nor dissatisfied	3. A moderate amount	3. A moderate amount	3. A moderate amount	3. A moderate amount	3. A moderate amount	2. A little	3. A moderate amount	3. Moderately	3. Moderately	3. Moderately	3. Moderately	3. Moderately	3. Neither poor nor good	3. Neither satisfied nor dissatisfied	3. Neither satisfied nor dissatisfied	3. Neither satisfied nor dissatisfied	3. Neither satisfied nor dissatisfied	3. Neither satisfied nor dissatisfied	3. Neither satisfied nor dissatisfied	3. Neither satisfied nor dissatisfied	3. Neither satisfied nor dissatisfied	3. Neither satisfied nor dissatisfied	3. Neither satisfied nor dissatisfied	5. Always
1	Nigeria	>23 Years	Single	Medicine	Forth year	Neither poor nor good	Neither satisfied nor dissatisfied	3. A moderate amount	3. A moderate amount	3. A moderate amount	3. A moderate amount	3. A moderate amount	2. A little	3. A moderate amount	3. Moderately	3. Moderately	3. Moderately	3. Moderately	3. Moderately	3. Neither poor nor good	3. Neither satisfied nor dissatisfied	3. Neither satisfied nor dissatisfied	3. Neither satisfied nor dissatisfied	3. Neither satisfied nor dissatisfied	3. Neither satisfied nor dissatisfied	3. Neither satisfied nor dissatisfied	3. Neither satisfied nor dissatisfied	3. Neither satisfied nor dissatisfied	3. Neither satisfied nor dissatisfied	3. Neither satisfied nor dissatisfied	5. Always
1	Nigeria	>23 Years	Single	Medicine	Forth year	Neither poor nor good	Neither satisfied nor dissatisfied	3. A moderate amount	3. A moderate amount	3. A moderate amount	3. A moderate amount	3. A moderate amount	2. A little	3. A moderate amount	3. Moderately	3. Moderately	3. Moderately	3. Moderately	3. Moderately	3. Neither poor nor good	3. Neither satisfied nor dissatisfied	3. Neither satisfied nor dissatisfied	3. Neither satisfied nor dissatisfied	3. Neither satisfied nor dissatisfied	3. Neither satisfied nor dissatisfied	3. Neither satisfied nor dissatisfied	3. Neither satisfied nor dissatisfied	3. Neither satisfied nor dissatisfied	3. Neither satisfied nor dissatisfied	3. Neither satisfied nor dissatisfied	5. Always
2	Nigeria	20 -23 years	Single	Medicine	Third Year	Good	Neither satisfied nor dissatisfied	2. A little	1. Not at all	3. A moderate amount	5. An extreme amount	3. A moderate amount	3. A moderate amount	3. A moderate amount	3. Moderately	5. Completely	3. Moderately	3. Moderately	3. Moderately	2. Poor	5. Very Satisfied	4. satisfied	4. satisfied	5. Very Satisfied	4. Satisfied	4. Satisfied	5. Very Satisfied	4. Satisfied	4. Satisfied	2. Dissatisfied	3. Quite often
2	Nigeria	20 -23 years	Single	Nursing	Forth year	Good	Neither satisfied nor dissatisfied	3. A moderate amount	3. A moderate amount	2. A little	4. Very much	3. A moderate amount	4. Very much	4. Very much	3. Moderately	2. A little	2. A little	3. Moderately	2. A little	2. Poor	1. Very dissatisfied	2. Dissatisfied	2. Dissatisfied	3. Neither satisfied nor dissatisfied	4. Satisfied	3. Neither satisfied nor dissatisfied	2. Dissatisfied	4. Satisfied	4. Satisfied	1. Very dissatisfied	2. Seldom
1	Nigeria	20 -23 years	Single	Medicine	Second Year	Neither poor nor good	Dissatisfied	3. A moderate amount	4. Very much	2. A little	2. A little	3. A moderate amount	3. A moderate amount	2. A little	4. Mostly	2. A little	3. Moderately	2. A little	3. Moderately	2. Poor	3. Neither satisfied nor dissatisfied	2. Dissatisfied	3. Neither satisfied nor dissatisfied	3. Neither satisfied nor dissatisfied	3. Neither satisfied nor dissatisfied	3. Neither satisfied nor dissatisfied	3. Neither satisfied nor dissatisfied	4. Satisfied	3. Neither satisfied nor dissatisfied	3. Neither satisfied nor dissatisfied	3. Quite often
2	Nigeria	20 -23 years	Single	Nursing	Forth year	Neither poor nor good	Dissatisfied	2. A little	3. A moderate amount	4. Very much	4. Very much	3. A moderate amount	2. A little	3. A moderate amount	3. Moderately	3. Moderately	2. A little	4. Mostly	3. Moderately	4. Good	3. Neither satisfied nor dissatisfied	2. Dissatisfied	2. Dissatisfied	3. Neither satisfied nor dissatisfied	2. Dissatisfied	2. Dissatisfied	4. Satisfied	4. Satisfied	2. Dissatisfied	2. Dissatisfied	4. Very often
2	Nigerian	20 -23 years	Single	Medicine	Third Year	Very good	Satisfied Very	2. A little	1. Not at all	4. Very much	4. Very much	5. An extreme amount	3. A moderate amount	3. A moderate amount	5. Completely	4. Mostly	5. Completely	4. Mostly	4. Mostly	4. Good	4. satisfied	5. Very Satisfied	4. satisfied	5. Very Satisfied	4. Satisfied	3. Neither satisfied nor dissatisfied	5. Very Satisfied	4. Satisfied	4. Satisfied	4. Satisfied	1. Never
1	Nigerian	>23 Years	Single	Pharmacy	Forth year	Very good	Satisfied Very	3. A moderate amount	4. Very much	5. An extreme amount	5. An extreme amount	3. A moderate amount	4. Very much	5. An extreme amount	4. Mostly	3. Moderately	2. A little	3. Moderately	2. A little	4. Good	5. Very Satisfied	3. Neither satisfied nor dissatisfied	4. satisfied	5. Very Satisfied	4. Satisfied	3. Neither satisfied nor dissatisfied	5. Very Satisfied	4. Satisfied	5. Very Satisfied	5. Very Satisfied	1. Never
1	Nigerian	>23 Years	Single	Dentistry	Third Year	Poor	Satisfied Very	4. Very much	3. A moderate amount	4. Very much	3. A moderate amount	4. Very much	2. A little	2. A little	4. Mostly	4. Mostly	5. Completely	5. Completely	5. Completely	5. Very good	5. Very Satisfied	5. Very Satisfied	5 .Very Satisfied	1. Very dissatisfied	5. Very Satisfied	5. Very Satisfied	5. Very Satisfied	2. Dissatisfied	5. Very Satisfied	4. Satisfied	5. Always
2	Nigerian	20 -23 years	Single	Dentistry	Third Year	Very good	satisfied	3. A moderate amount	4. Very much	3. A moderate amount	4. Very much	3. A moderate amount	2. A little	2. A little	3. Moderately	5. Completely	4. Mostly	3. Moderately	3. Moderately	3. Neither poor nor good	3. Neither satisfied nor dissatisfied	3. Neither satisfied nor dissatisfied	4. satisfied	3. Neither satisfied nor dissatisfied	4. Satisfied	4. Satisfied	2. Dissatisfied	2. Dissatisfied	2. Dissatisfied	2. Dissatisfied	3. Quite often
1	Nigerian	< 20 years	Single	Dentistry	Second Year	Very good	satisfied	1. Not at all	1. Not at all	4. Very much	5. An extreme amount	4. Very much	4. Very much	4. Very much	4. Mostly	5. Completely	5. Completely	4. Mostly	4. Mostly	4. Good	5. Very Satisfied	5. Very Satisfied	3. Neither satisfied nor dissatisfied	5. Very Satisfied	5. Very Satisfied	4. Satisfied	5. Very Satisfied	4. Satisfied	3. Neither satisfied nor dissatisfied	3. Neither satisfied nor dissatisfied	1. Never
1	Nigerian	>23 Years	Divorced	Pharmacy	Fifth year	Very good	satisfied	3. A moderate amount	3. A moderate amount	4. Very much	3. A moderate amount	3. A moderate amount	3. A moderate amount	3. A moderate amount	3. Moderately	3. Moderately	5. Completely	4. Mostly	3. Moderately	3. Neither poor nor good	4. satisfied	3. Neither satisfied nor dissatisfied	4. satisfied	4. Satisfied	4. Satisfied	4. Satisfied	5. Very Satisfied	3. Neither satisfied nor dissatisfied	3. Neither satisfied nor dissatisfied	5. Very Satisfied	2. Seldom
2	Nigerian	< 20 years	Single	Pharmacy	Second Year	Neither poor nor good	satisfied	3. A moderate amount	3. A moderate amount	4. Very much	3. A moderate amount	2. A little	2. A little	3. A moderate amount	4. Mostly	3. Moderately	3. Moderately	3. Moderately	2. A little	3. Neither poor nor good	3. Neither satisfied nor dissatisfied	3. Neither satisfied nor dissatisfied	4. satisfied	5. Very Satisfied	2. Dissatisfied	3. Neither satisfied nor dissatisfied	3. Neither satisfied nor dissatisfied	3. Neither satisfied nor dissatisfied	3. Neither satisfied nor dissatisfied	2. Dissatisfied	4. Very often
1	Nigerian	20 -23 years	Single	Nursing	Third Year	Good	satisfied	2. A little	4. Very much	3. A moderate amount	5. An extreme amount	5. An extreme amount	5. An extreme amount	5. An extreme amount	4. Mostly	3. Moderately	3. Moderately	5. Completely	2. A little	4. Good	4. satisfied	4. satisfied	3. Neither satisfied nor dissatisfied	4. Satisfied	4. Satisfied	3. Neither satisfied nor dissatisfied	4. Satisfied	4. Satisfied	4. Satisfied	4. Satisfied	3. Quite often
2	Nigerian	20 -23 years	Others	Medicine	Third Year	Good	satisfied	1. Not at all	1. Not at all	4. Very much	4. Very much	3. A moderate amount	3. A moderate amount	4. Very much	4. Mostly	5. Completely	5. Completely	4. Mostly	3. Moderately	4. Good	5. Very Satisfied	4. satisfied	3. Neither satisfied nor dissatisfied	5. Very Satisfied	4. Satisfied	3. Neither satisfied nor dissatisfied	5. Very Satisfied	4. Satisfied	3. Neither satisfied nor dissatisfied	3. Neither satisfied nor dissatisfied	1. Never
2	Nigerian	>23 Years	Single	Medicine	Second Year	Good	satisfied	4. Very much	4. Very much	4. Very much	4. Very much	4. Very much	4. Very much	4. Very much	4. Mostly	4. Mostly	4. Mostly	4. Mostly	4. Mostly	4. Good	4. satisfied	4. satisfied	4. satisfied	4. Satisfied	4. Satisfied	4. Satisfied	4. Satisfied	4. Satisfied	4. Satisfied	4. Satisfied	2. Seldom
2	Nigerian	20 -23 years	Single	Nursing	Forth year	Good	satisfied	1. Not at all	2. A little	3. A moderate amount	1. Not at all	4. Very much	3. A moderate amount	3. A moderate amount	3. Moderately	5. Completely	3. Moderately	3. Moderately	3. Moderately	4. Good	4. satisfied	1. Very dissatisfied	4. satisfied	5. Very Satisfied	5. Very Satisfied	4. Satisfied	4. Satisfied	2. Dissatisfied	4. Satisfied	2. Dissatisfied	3. Quite often
2	NIGERIAN	20 -23 years	Single	Nursing	Forth year	Good	satisfied	3. A moderate amount	4. Very much	3. A moderate amount	3. A moderate amount	4. Very much	3. A moderate amount	4. Very much	2. A little	3. Moderately	3. Moderately	4. Mostly	2. A little	3. Neither poor nor good	3. Neither satisfied nor dissatisfied	3. Neither satisfied nor dissatisfied	3. Neither satisfied nor dissatisfied	3. Neither satisfied nor dissatisfied	4. Satisfied	4. Satisfied	4. Satisfied	4. Satisfied	4. Satisfied	4. Satisfied	3. Quite often
2	Nigerian	20 -23 years	Single	Medicine	Forth year	Good	satisfied	2. A little	3. A moderate amount	3. A moderate amount	5. An extreme amount	3. A moderate amount	3. A moderate amount	3. A moderate amount	4. Mostly	3. Moderately	3. Moderately	3. Moderately	3. Moderately	4. Good	4. satisfied	4. satisfied	4. satisfied	4. Satisfied	4. Satisfied	4. Satisfied	4. Satisfied	4. Satisfied	4. Satisfied	4. Satisfied	4. Very often
1	Nigerian	>23 Years	Single	Medicine	Forth year	Good	satisfied	1. Not at all	1. Not at all	5. An extreme amount	5. An extreme amount	4. Very much	4. Very much	4. Very much	5. Completely	5. Completely	4. Mostly	4. Mostly	4. Mostly	4. Good	5. Very Satisfied	5. Very Satisfied	4. satisfied	5. Very Satisfied	5. Very Satisfied	4. Satisfied	4. Satisfied	4. Satisfied	3. Neither satisfied nor dissatisfied	3. Neither satisfied nor dissatisfied	1. Never
2	Nigerian	20 -23 years	Single	Medicine	Fifth year	Good	satisfied	3. A moderate amount	3. A moderate amount	3. A moderate amount	4. Very much	4. Very much	3. A moderate amount	4. Very much	3. Moderately	2. A little	3. Moderately	3. Moderately	2. A little	2. Poor	2. Dissatisfied	4. satisfied	4. satisfied	4. Satisfied	5. Very Satisfied	2. Dissatisfied	2. Dissatisfied	4. Satisfied	2. Dissatisfied	1. Very dissatisfied	2. Seldom
1	Nigerian	20 -23 years	Divorced	Pharmacy	Forth year	Neither poor nor good	Neither satisfied nor dissatisfied	3. A moderate amount	3. A moderate amount	3. A moderate amount	2. A little	3. A moderate amount	3. A moderate amount	2. A little	4. Mostly	3. Moderately	3. Moderately	2. A little	3. Moderately	4. Good	3. Neither satisfied nor dissatisfied	4. satisfied	4. satisfied	3. Neither satisfied nor dissatisfied	4. Satisfied	3. Neither satisfied nor dissatisfied	4. Satisfied	3. Neither satisfied nor dissatisfied	3. Neither satisfied nor dissatisfied	3. Neither satisfied nor dissatisfied	3. Quite often
2	Nigerian	20 -23 years	Single	Nursing	Forth year	Neither poor nor good	Neither satisfied nor dissatisfied	2. A little	3. A moderate amount	3. A moderate amount	4. Very much	3. A moderate amount	3. A moderate amount	3. A moderate amount	2. A little	3. Moderately	2. A little	3. Moderately	2. A little	2. Poor	2. Dissatisfied	2. Dissatisfied	3. Neither satisfied nor dissatisfied	3. Neither satisfied nor dissatisfied	3. Neither satisfied nor dissatisfied	1. Very dissatisfied	2. Dissatisfied	4. Satisfied	2. Dissatisfied	1. Very dissatisfied	2. Seldom
1	Nigerian	< 20 years	Married	Pharmacy	First year	Neither poor nor good	Neither satisfied nor dissatisfied	3. A moderate amount	3. A moderate amount	2. A little	3. A moderate amount	1. Not at all	3. A moderate amount	3. A moderate amount	4. Mostly	3. Moderately	3. Moderately	1. Not at all	3. Moderately	3. Neither poor nor good	3. Neither satisfied nor dissatisfied	2. Dissatisfied	1. Very dissatisfied	4. Satisfied	4. Satisfied	3. Neither satisfied nor dissatisfied	4. Satisfied	3. Neither satisfied nor dissatisfied	3. Neither satisfied nor dissatisfied	3. Neither satisfied nor dissatisfied	1. Never
2	Nigerian	< 20 years	Others	Medicine	Second Year	Good	Neither satisfied nor dissatisfied	3. A moderate amount	2. A little	3. A moderate amount	3. A moderate amount	3. A moderate amount	2. A little	3. A moderate amount	3. Moderately	3. Moderately	4. Mostly	4. Mostly	3. Moderately	3. Neither poor nor good	4. satisfied	4. satisfied	3. Neither satisfied nor dissatisfied	2. Dissatisfied	2. Dissatisfied	3. Neither satisfied nor dissatisfied	1. Very dissatisfied	4. Satisfied	4. Satisfied	4. Satisfied	4. Very often
2	Nigerian	20 -23 years	Single	Nursing	Forth year	Good	Neither satisfied nor dissatisfied	2. A little	4. Very much	2. A little	4. Very much	4. Very much	3. A moderate amount	3. A moderate amount	3. Moderately	3. Moderately	3. Moderately	3. Moderately	4. Mostly	4. Good	1. Very dissatisfied	3. Neither satisfied nor dissatisfied	2. Dissatisfied	2. Dissatisfied	1. Very dissatisfied	4. Satisfied	1. Very dissatisfied	2. Dissatisfied	1. Very dissatisfied	4. Satisfied	1. Never
1	Nigerian	>23 Years	Single	Medicine	Forth year	Good	Neither satisfied nor dissatisfied	2. A little	2. A little	3. A moderate amount	4. Very much	4. Very much	4. Very much	3. A moderate amount	3. Moderately	4. Mostly	3. Moderately	3. Moderately	3. Moderately	4. Good	4. satisfied	4. satisfied	4. satisfied	4. Satisfied	3. Neither satisfied nor dissatisfied	2. Dissatisfied	3. Neither satisfied nor dissatisfied	2. Dissatisfied	4. Satisfied	3. Neither satisfied nor dissatisfied	2. Seldom
1	Nigerian	>23 Years	Single	Medicine	Forth year	Good	Neither satisfied nor dissatisfied	2. A little	2. A little	3. A moderate amount	4. Very much	4. Very much	4. Very much	3. A moderate amount	3. Moderately	4. Mostly	3. Moderately	3. Moderately	3. Moderately	4. Good	4. satisfied	4. satisfied	4. satisfied	4. Satisfied	3. Neither satisfied nor dissatisfied	2. Dissatisfied	3. Neither satisfied nor dissatisfied	2. Dissatisfied	4. Satisfied	3. Neither satisfied nor dissatisfied	2. Seldom
1	Nigerian	>23 Years	Single	Medicine	Forth year	Good	Neither satisfied nor dissatisfied	2. A little	2. A little	3. A moderate amount	4. Very much	4. Very much	4. Very much	3. A moderate amount	3. Moderately	4. Mostly	3. Moderately	3. Moderately	3. Moderately	4. Good	4. satisfied	4. satisfied	4. satisfied	4. Satisfied	3. Neither satisfied nor dissatisfied	2. Dissatisfied	3. Neither satisfied nor dissatisfied	2. Dissatisfied	4. Satisfied	3. Neither satisfied nor dissatisfied	2. Seldom
1	Nigerian	< 20 years	Single	Pharmacy	Forth year	Poor	Dissatisfied	3. A moderate amount	2. A little	2. A little	2. A little	1. Not at all	2. A little	3. A moderate amount	3. Moderately	3. Moderately	2. A little	3. Moderately	2. A little	3. Neither poor nor good	3. Neither satisfied nor dissatisfied	2. Dissatisfied	2. Dissatisfied	3. Neither satisfied nor dissatisfied	3. Neither satisfied nor dissatisfied	3. Neither satisfied nor dissatisfied	3. Neither satisfied nor dissatisfied	2. Dissatisfied	3. Neither satisfied nor dissatisfied	2. Dissatisfied	4. Very often
2	Nigerian	20 -23 years	Single	Medicine	Forth year	Neither poor nor good	Dissatisfied	5. An extreme amount	4. Very much	2. A little	3. A moderate amount	3. A moderate amount	3. A moderate amount	2. A little	3. Moderately	5. Completely	2. A little	5. Completely	2. A little	3. Neither poor nor good	3. Neither satisfied nor dissatisfied	3. Neither satisfied nor dissatisfied	3. Neither satisfied nor dissatisfied	3. Neither satisfied nor dissatisfied	2. Dissatisfied	2. Dissatisfied	4. Satisfied	3. Neither satisfied nor dissatisfied	3. Neither satisfied nor dissatisfied	2. Dissatisfied	4. Very often
1	Nigerians	20 -23 years	Single	Pharmacy	Third Year	Very good	Very dissatisfied	1. Not at all	1. Not at all	1. Not at all	2. A little	1. Not at all	2. A little	1. Not at all	1. Not at all	1. Not at all	1. Not at all	1. Not at all	1. Not at all	1. Very poor	1. Very dissatisfied	1. Very dissatisfied	1. Very dissatisfied	1. Very dissatisfied	1. Very dissatisfied	1. Very dissatisfied	1. Very dissatisfied	1. Very dissatisfied	1. Very dissatisfied	1. Very dissatisfied	1. Never
1	Nigerians	>23 Years	Single	Pharmacy	Third Year	Very good	Satisfied Very	5. An extreme amount	5. An extreme amount	5. An extreme amount	5. An extreme amount	5. An extreme amount	5. An extreme amount	5. An extreme amount	5. Completely	5. Completely	5. Completely	5. Completely	5. Completely	5. Very good	5. Very Satisfied	5. Very Satisfied	5 .Very Satisfied	5. Very Satisfied	5. Very Satisfied	5. Very Satisfied	5. Very Satisfied	3. Neither satisfied nor dissatisfied	2. Dissatisfied	5. Very Satisfied	5. Always
1	Nigerians	>23 Years	Single	Pharmacy	Fifth year	Good	satisfied	4. Very much	4. Very much	4. Very much	4. Very much	4. Very much	4. Very much	4. Very much	4. Mostly	4. Mostly	4. Mostly	2. A little	1. Not at all	4. Good	2. Dissatisfied	2. Dissatisfied	3. Neither satisfied nor dissatisfied	4. Satisfied	4. Satisfied	4. Satisfied	4. Satisfied	4. Satisfied	4. Satisfied	4. Satisfied	4. Very often
1	Nigerians	< 20 years	Single	Pharmacy	Third Year	Neither poor nor good	Neither satisfied nor dissatisfied	1. Not at all	2. A little	2. A little	1. Not at all	2. A little	2. A little	2. A little	2. A little	2. A little	2. A little	2. A little	2. A little	3. Neither poor nor good	2. Dissatisfied	2. Dissatisfied	2. Dissatisfied	2. Dissatisfied	2. Dissatisfied	1. Very dissatisfied	1. Very dissatisfied	2. Dissatisfied	2. Dissatisfied	1. Very dissatisfied	1. Never
2	Saudanese	< 20 years	Single	Nursing	First year	Neither poor nor good	satisfied	2. A little	1. Not at all	3. A moderate amount	3. A moderate amount	3. A moderate amount	3. A moderate amount	3. A moderate amount	3. Moderately	3. Moderately	3. Moderately	3. Moderately	3. Moderately	3. Neither poor nor good	4. satisfied	4. satisfied	3. Neither satisfied nor dissatisfied	5. Very Satisfied	3. Neither satisfied nor dissatisfied	3. Neither satisfied nor dissatisfied	2. Dissatisfied	3. Neither satisfied nor dissatisfied	4. Satisfied	4. Satisfied	2. Seldom
1	Senegal	>23 Years	Single	Medicine	Fifth year	Good	satisfied	2. A little	2. A little	3. A moderate amount	4. Very much	4. Very much	3. A moderate amount	3. A moderate amount	5. Completely	5. Completely	3. Moderately	5. Completely	4. Mostly	4. Good	4. satisfied	4. satisfied	4. satisfied	4. Satisfied	4. Satisfied	4. Satisfied	4. Satisfied	3. Neither satisfied nor dissatisfied	3. Neither satisfied nor dissatisfied	3. Neither satisfied nor dissatisfied	3. Quite often
2	Soma	20 -23 years	Single	Nursing	Forth year	Good	Satisfied Very	2. A little	1. Not at all	4. Very much	1. Not at all	4. Very much	4. Very much	4. Very much	4. Mostly	5. Completely	4. Mostly	3. Moderately	3. Moderately	4. Good	5. Very Satisfied	4. satisfied	4. satisfied	4. Satisfied	5. Very Satisfied	1. Very dissatisfied	5. Very Satisfied	4. Satisfied	2. Dissatisfied	1. Very dissatisfied	3. Quite often
2	Somal	< 20 years	Single	Medicine	First year	Good	satisfied	3. A moderate amount	3. A moderate amount	3. A moderate amount	3. A moderate amount	3. A moderate amount	3. A moderate amount	3. A moderate amount	3. Moderately	5. Completely	3. Moderately	3. Moderately	3. Moderately	4. Good	4. satisfied	4. satisfied	4. satisfied	5. Very Satisfied	4. Satisfied	3. Neither satisfied nor dissatisfied	4. Satisfied	4. Satisfied	4. Satisfied	4. Satisfied	3. Quite often
1	Somal	20 -23 years	Single	Medicine	Third Year	Neither poor nor good	Dissatisfied	3. A moderate amount	3. A moderate amount	2. A little	4. Very much	3. A moderate amount	3. A moderate amount	2. A little	4. Mostly	3. Moderately	4. Mostly	2. A little	3. Moderately	2. Poor	3. Neither satisfied nor dissatisfied	3. Neither satisfied nor dissatisfied	3. Neither satisfied nor dissatisfied	3. Neither satisfied nor dissatisfied	2. Dissatisfied	2. Dissatisfied	3. Neither satisfied nor dissatisfied	4. Satisfied	4. Satisfied	3. Neither satisfied nor dissatisfied	2. Seldom
2	Somali	20 -23 years	Single	Pharmacy	Third Year	Very poor	Very dissatisfied	1. Not at all	1. Not at all	1. Not at all	1. Not at all	1. Not at all	1. Not at all	1. Not at all	1. Not at all	1. Not at all	1. Not at all	1. Not at all	1. Not at all	2. Poor	2. Dissatisfied	2. Dissatisfied	2. Dissatisfied	2. Dissatisfied	2. Dissatisfied	2. Dissatisfied	1. Very dissatisfied	1. Very dissatisfied	2. Dissatisfied	2. Dissatisfied	1. Never
2	Somali	20 -23 years	Single	Pharmacy	Forth year	Neither poor nor good	Very dissatisfied	1. Not at all	2. A little	2. A little	2. A little	1. Not at all	1. Not at all	1. Not at all	2. A little	1. Not at all	1. Not at all	4. Mostly	2. A little	3. Neither poor nor good	5. Very Satisfied	3. Neither satisfied nor dissatisfied	3. Neither satisfied nor dissatisfied	3. Neither satisfied nor dissatisfied	5. Very Satisfied	1. Very dissatisfied	1. Very dissatisfied	1. Very dissatisfied	1. Very dissatisfied	4. Satisfied	3. Quite often
1	Somali	20 -23 years	Single	Medicine	Third Year	Very good	Satisfied Very	3. A moderate amount	1. Not at all	4. Very much	4. Very much	4. Very much	4. Very much	3. A moderate amount	5. Completely	5. Completely	4. Mostly	4. Mostly	3. Moderately	2. Poor	4. satisfied	5. Very Satisfied	5 .Very Satisfied	5. Very Satisfied	4. Satisfied	3. Neither satisfied nor dissatisfied	4. Satisfied	4. Satisfied	3. Neither satisfied nor dissatisfied	3. Neither satisfied nor dissatisfied	2. Seldom
1	Somali	20 -23 years	Single	Pharmacy	Forth year	Very good	Satisfied Very	4. Very much	2. A little	5. An extreme amount	5. An extreme amount	4. Very much	5. An extreme amount	4. Very much	4. Mostly	4. Mostly	4. Mostly	4. Mostly	3. Moderately	4. Good	4. satisfied	4. satisfied	4. satisfied	5. Very Satisfied	5. Very Satisfied	5. Very Satisfied	5. Very Satisfied	3. Neither satisfied nor dissatisfied	4. Satisfied	3. Neither satisfied nor dissatisfied	1. Never
2	Somali	>23 Years	Single	Nursing	Forth year	Very good	Satisfied Very	1. Not at all	1. Not at all	4. Very much	5. An extreme amount	3. A moderate amount	4. Very much	3. A moderate amount	4. Mostly	5. Completely	5. Completely	4. Mostly	2. A little	4. Good	4. satisfied	5. Very Satisfied	4. satisfied	5. Very Satisfied	4. Satisfied	3. Neither satisfied nor dissatisfied	2. Dissatisfied	4. Satisfied	4. Satisfied	3. Neither satisfied nor dissatisfied	1. Never
2	Somali	>23 Years	Single	Medicine	Forth year	Good	Satisfied Very	1. Not at all	1. Not at all	2. A little	4. Very much	3. A moderate amount	5. An extreme amount	3. A moderate amount	3. Moderately	5. Completely	4. Mostly	2. A little	2. A little	3. Neither poor nor good	3. Neither satisfied nor dissatisfied	3. Neither satisfied nor dissatisfied	4. satisfied	5. Very Satisfied	4. Satisfied	3. Neither satisfied nor dissatisfied	3. Neither satisfied nor dissatisfied	5. Very Satisfied	4. Satisfied	3. Neither satisfied nor dissatisfied	2. Seldom
1	Somali	>23 Years	Single	Medicine	Fifth year	Good	Satisfied Very	1. Not at all	1. Not at all	4. Very much	3. A moderate amount	4. Very much	4. Very much	3. A moderate amount	3. Moderately	3. Moderately	3. Moderately	3. Moderately	3. Moderately	4. Good	4. satisfied	5. Very Satisfied	4. satisfied	5. Very Satisfied	5. Very Satisfied	5. Very Satisfied	5. Very Satisfied	4. Satisfied	4. Satisfied	3. Neither satisfied nor dissatisfied	2. Seldom
1	Somali	20 -23 years	Single	Pharmacy	Second Year	Very good	satisfied	1. Not at all	1. Not at all	4. Very much	4. Very much	3. A moderate amount	4. Very much	3. A moderate amount	4. Mostly	4. Mostly	4. Mostly	3. Moderately	3. Moderately	4. Good	4. satisfied	4. satisfied	4. satisfied	4. Satisfied	4. Satisfied	4. Satisfied	4. Satisfied	4. Satisfied	4. Satisfied	4. Satisfied	1. Never
2	Somali	20 -23 years	Single	Laboratory	Forth year	Very good	satisfied	1. Not at all	1. Not at all	5. An extreme amount	5. An extreme amount	5. An extreme amount	4. Very much	5. An extreme amount	4. Mostly	4. Mostly	4. Mostly	4. Mostly	2. A little	5. Very good	5. Very Satisfied	5. Very Satisfied	5 .Very Satisfied	5. Very Satisfied	5. Very Satisfied	3. Neither satisfied nor dissatisfied	4. Satisfied	5. Very Satisfied	5. Very Satisfied	4. Satisfied	2. Seldom
1	Somali	>23 Years	Single	Laboratory	Fifth year	Very good	satisfied	1. Not at all	2. A little	3. A moderate amount	3. A moderate amount	4. Very much	3. A moderate amount	5. An extreme amount	4. Mostly	4. Mostly	3. Moderately	4. Mostly	5. Completely	5. Very good	4. satisfied	4. satisfied	5 .Very Satisfied	5. Very Satisfied	4. Satisfied	3. Neither satisfied nor dissatisfied	4. Satisfied	4. Satisfied	5. Very Satisfied	4. Satisfied	1. Never
2	Somali	20 -23 years	Single	Dentistry	Forth year	Poor	satisfied	3. A moderate amount	3. A moderate amount	3. A moderate amount	4. Very much	4. Very much	3. A moderate amount	4. Very much	1. Not at all	3. Moderately	4. Mostly	3. Moderately	3. Moderately	3. Neither poor nor good	3. Neither satisfied nor dissatisfied	3. Neither satisfied nor dissatisfied	3. Neither satisfied nor dissatisfied	3. Neither satisfied nor dissatisfied	3. Neither satisfied nor dissatisfied	3. Neither satisfied nor dissatisfied	3. Neither satisfied nor dissatisfied	3. Neither satisfied nor dissatisfied	3. Neither satisfied nor dissatisfied	3. Neither satisfied nor dissatisfied	3. Quite often
2	Somali	>23 Years	Single	Pharmacy	Fifth year	Poor	satisfied	3. A moderate amount	3. A moderate amount	1. Not at all	2. A little	3. A moderate amount	1. Not at all	2. A little	2. A little	1. Not at all	1. Not at all	2. A little	1. Not at all	3. Neither poor nor good	4. satisfied	3. Neither satisfied nor dissatisfied	3. Neither satisfied nor dissatisfied	3. Neither satisfied nor dissatisfied	3. Neither satisfied nor dissatisfied	3. Neither satisfied nor dissatisfied	3. Neither satisfied nor dissatisfied	4. Satisfied	2. Dissatisfied	2. Dissatisfied	1. Never
2	Somali	20 -23 years	Single	Pharmacy	Third Year	Neither poor nor good	satisfied	3. A moderate amount	4. Very much	5. An extreme amount	3. A moderate amount	3. A moderate amount	5. An extreme amount	2. A little	1. Not at all	2. A little	5. Completely	2. A little	4. Mostly	4. Good	5. Very Satisfied	1. Very dissatisfied	3. Neither satisfied nor dissatisfied	4. Satisfied	1. Very dissatisfied	4. Satisfied	2. Dissatisfied	3. Neither satisfied nor dissatisfied	3. Neither satisfied nor dissatisfied	1. Very dissatisfied	5. Always
2	Somali	20 -23 years	Single	Pharmacy	Third Year	Good	satisfied	2. A little	2. A little	4. Very much	3. A moderate amount	2. A little	3. A moderate amount	4. Very much	4. Mostly	3. Moderately	2. A little	3. Moderately	1. Not at all	3. Neither poor nor good	4. satisfied	4. satisfied	4. satisfied	4. Satisfied	4. Satisfied	2. Dissatisfied	3. Neither satisfied nor dissatisfied	3. Neither satisfied nor dissatisfied	4. Satisfied	3. Neither satisfied nor dissatisfied	3. Quite often
1	Somali	20 -23 years	Single	Medicine	Third Year	Good	satisfied	2. A little	3. A moderate amount	4. Very much	3. A moderate amount	4. Very much	4. Very much	3. A moderate amount	5. Completely	4. Mostly	3. Moderately	3. Moderately	3. Moderately	4. Good	4. satisfied	2. Dissatisfied	4. satisfied	4. Satisfied	5. Very Satisfied	2. Dissatisfied	5. Very Satisfied	2. Dissatisfied	2. Dissatisfied	3. Neither satisfied nor dissatisfied	2. Seldom
2	Somali	>23 Years	Married	Pharmacy	Second Year	Good	satisfied	3. A moderate amount	3. A moderate amount	4. Very much	5. An extreme amount	4. Very much	4. Very much	4. Very much	2. A little	3. Moderately	3. Moderately	4. Mostly	2. A little	4. Good	5. Very Satisfied	4. satisfied	4. satisfied	5. Very Satisfied	5. Very Satisfied	5. Very Satisfied	5. Very Satisfied	4. Satisfied	4. Satisfied	5. Very Satisfied	3. Quite often
1	Somali	>23 Years	Single	Pharmacy	Forth year	Good	satisfied	2. A little	1. Not at all	4. Very much	4. Very much	3. A moderate amount	4. Very much	3. A moderate amount	4. Mostly	3. Moderately	3. Moderately	4. Mostly	3. Moderately	4. Good	4. satisfied	4. satisfied	4. satisfied	4. Satisfied	3. Neither satisfied nor dissatisfied	2. Dissatisfied	4. Satisfied	3. Neither satisfied nor dissatisfied	2. Dissatisfied	2. Dissatisfied	3. Quite often
1	somali	20 -23 years	Single	Medicine	Forth year	Good	satisfied	3. A moderate amount	2. A little	4. Very much	4. Very much	4. Very much	4. Very much	4. Very much	4. Mostly	5. Completely	3. Moderately	3. Moderately	3. Moderately	4. Good	4. satisfied	4. satisfied	4. satisfied	5. Very Satisfied	4. Satisfied	4. Satisfied	4. Satisfied	5. Very Satisfied	4. Satisfied	4. Satisfied	3. Quite often
1	Somali	>23 Years	Single	Medicine	Forth year	Good	satisfied	2. A little	1. Not at all	4. Very much	4. Very much	3. A moderate amount	4. Very much	4. Very much	4. Mostly	4. Mostly	5. Completely	4. Mostly	2. A little	4. Good	4. satisfied	4. satisfied	4. satisfied	4. Satisfied	2. Dissatisfied	3. Neither satisfied nor dissatisfied	3. Neither satisfied nor dissatisfied	4. Satisfied	4. Satisfied	5. Very Satisfied	4. Very often
1	Somali	>23 Years	Married	Laboratory	Forth year	Good	satisfied	3. A moderate amount	4. Very much	5. An extreme amount	2. A little	4. Very much	2. A little	3. A moderate amount	5. Completely	2. A little	4. Mostly	2. A little	4. Mostly	3. Neither poor nor good	3. Neither satisfied nor dissatisfied	4. satisfied	2. Dissatisfied	5. Very Satisfied	4. Satisfied	2. Dissatisfied	4. Satisfied	3. Neither satisfied nor dissatisfied	3. Neither satisfied nor dissatisfied	2. Dissatisfied	4. Very often
2	Somali	>23 Years	Single	Pharmacy	Fifth year	Good	satisfied	3. A moderate amount	1. Not at all	3. A moderate amount	4. Very much	4. Very much	4. Very much	3. A moderate amount	3. Moderately	3. Moderately	3. Moderately	3. Moderately	2. A little	3. Neither poor nor good	4. satisfied	4. satisfied	4. satisfied	5. Very Satisfied	4. Satisfied	3. Neither satisfied nor dissatisfied	4. Satisfied	4. Satisfied	3. Neither satisfied nor dissatisfied	2. Dissatisfied	2. Seldom
2	Somali	>23 Years	Single	Nursing	Fifth year	Good	satisfied	2. A little	2. A little	4. Very much	3. A moderate amount	2. A little	3. A moderate amount	2. A little	4. Mostly	5. Completely	2. A little	3. Moderately	2. A little	4. Good	4. satisfied	4. satisfied	5 .Very Satisfied	5. Very Satisfied	4. Satisfied	2. Dissatisfied	4. Satisfied	4. Satisfied	4. Satisfied	4. Satisfied	3. Quite often
2	Somali	>23 Years	Married	Nursing	Fifth year	Good	satisfied	3. A moderate amount	1. Not at all	4. Very much	4. Very much	3. A moderate amount	4. Very much	3. A moderate amount	4. Mostly	4. Mostly	5. Completely	4. Mostly	4. Mostly	4. Good	5. Very Satisfied	4. satisfied	4. satisfied	4. Satisfied	4. Satisfied	4. Satisfied	5. Very Satisfied	4. Satisfied	4. Satisfied	4. Satisfied	1. Never
2	Somali	< 20 years	Married	Laboratory	Fifth year	Good	satisfied	4. Very much	4. Very much	4. Very much	5. An extreme amount	4. Very much	5. An extreme amount	3. A moderate amount	4. Mostly	5. Completely	3. Moderately	3. Moderately	3. Moderately	4. Good	4. satisfied	5. Very Satisfied	3. Neither satisfied nor dissatisfied	5. Very Satisfied	5. Very Satisfied	3. Neither satisfied nor dissatisfied	3. Neither satisfied nor dissatisfied	4. Satisfied	4. Satisfied	3. Neither satisfied nor dissatisfied	1. Never
1	Somali	>23 Years	Single	Dentistry	Fifth year	Good	satisfied	3. A moderate amount	1. Not at all	5. An extreme amount	5. An extreme amount	4. Very much	5. An extreme amount	4. Very much	5. Completely	5. Completely	4. Mostly	4. Mostly	4. Mostly	4. Good	5. Very Satisfied	4. satisfied	5 .Very Satisfied	5. Very Satisfied	5. Very Satisfied	5. Very Satisfied	5. Very Satisfied	5. Very Satisfied	5. Very Satisfied	5. Very Satisfied	1. Never
1	Somali	>23 Years	Single	Dentistry	Fifth year	Good	satisfied	3. A moderate amount	1. Not at all	5. An extreme amount	5. An extreme amount	4. Very much	5. An extreme amount	4. Very much	5. Completely	5. Completely	4. Mostly	4. Mostly	4. Mostly	4. Good	5. Very Satisfied	4. satisfied	5 .Very Satisfied	5. Very Satisfied	5. Very Satisfied	5. Very Satisfied	5. Very Satisfied	5. Very Satisfied	5. Very Satisfied	5. Very Satisfied	1. Never
1	Somali	>23 Years	Divorced	Medicine	Forth year	Neither poor nor good	Neither satisfied nor dissatisfied	3. A moderate amount	2. A little	4. Very much	3. A moderate amount	2. A little	2. A little	2. A little	2. A little	3. Moderately	3. Moderately	2. A little	4. Mostly	4. Good	4. satisfied	4. satisfied	4. satisfied	4. Satisfied	5. Very Satisfied	4. Satisfied	4. Satisfied	2. Dissatisfied	3. Neither satisfied nor dissatisfied	2. Dissatisfied	4. Very often
1	Somali	>23 Years	Single	Laboratory	Forth year	Neither poor nor good	Neither satisfied nor dissatisfied	3. A moderate amount	3. A moderate amount	3. A moderate amount	3. A moderate amount	3. A moderate amount	3. A moderate amount	3. A moderate amount	3. Moderately	3. Moderately	3. Moderately	3. Moderately	3. Moderately	3. Neither poor nor good	3. Neither satisfied nor dissatisfied	3. Neither satisfied nor dissatisfied	3. Neither satisfied nor dissatisfied	3. Neither satisfied nor dissatisfied	3. Neither satisfied nor dissatisfied	3. Neither satisfied nor dissatisfied	3. Neither satisfied nor dissatisfied	3. Neither satisfied nor dissatisfied	3. Neither satisfied nor dissatisfied	3. Neither satisfied nor dissatisfied	3. Quite often
2	Somali	20 -23 years	Single	Pharmacy	First year	Neither poor nor good	Neither satisfied nor dissatisfied	2. A little	2. A little	3. A moderate amount	2. A little	2. A little	4. Very much	3. A moderate amount	2. A little	3. Moderately	2. A little	3. Moderately	2. A little	2. Poor	4. satisfied	3. Neither satisfied nor dissatisfied	2. Dissatisfied	3. Neither satisfied nor dissatisfied	4. Satisfied	3. Neither satisfied nor dissatisfied	4. Satisfied	3. Neither satisfied nor dissatisfied	3. Neither satisfied nor dissatisfied	2. Dissatisfied	4. Very often
2	Somali	20 -23 years	Single	Nursing	Fifth year	Neither poor nor good	Neither satisfied nor dissatisfied	3. A moderate amount	2. A little	1. Not at all	2. A little	2. A little	4. Very much	4. Very much	1. Not at all	2. A little	2. A little	3. Moderately	3. Moderately	3. Neither poor nor good	3. Neither satisfied nor dissatisfied	2. Dissatisfied	3. Neither satisfied nor dissatisfied	2. Dissatisfied	1. Very dissatisfied	1. Very dissatisfied	2. Dissatisfied	3. Neither satisfied nor dissatisfied	3. Neither satisfied nor dissatisfied	3. Neither satisfied nor dissatisfied	4. Very often
1	Somali	20 -23 years	Single	Laboratory	Third Year	Good	Neither satisfied nor dissatisfied	3. A moderate amount	1. Not at all	4. Very much	4. Very much	3. A moderate amount	3. A moderate amount	2. A little	3. Moderately	4. Mostly	2. A little	4. Mostly	2. A little	3. Neither poor nor good	2. Dissatisfied	3. Neither satisfied nor dissatisfied	2. Dissatisfied	3. Neither satisfied nor dissatisfied	3. Neither satisfied nor dissatisfied	2. Dissatisfied	3. Neither satisfied nor dissatisfied	2. Dissatisfied	3. Neither satisfied nor dissatisfied	2. Dissatisfied	3. Quite often
2	Somali	< 20 years	Single	Nursing	Second Year	Good	Neither satisfied nor dissatisfied	2. A little	1. Not at all	4. Very much	3. A moderate amount	2. A little	4. Very much	4. Very much	4. Mostly	2. A little	5. Completely	2. A little	1. Not at all	2. Poor	4. satisfied	4. satisfied	2. Dissatisfied	3. Neither satisfied nor dissatisfied	2. Dissatisfied	4. Satisfied	2. Dissatisfied	3. Neither satisfied nor dissatisfied	2. Dissatisfied	2. Dissatisfied	3. Quite often
2	Somali	20 -23 years	Single	Pharmacy	Fifth year	Very good	Dissatisfied	3. A moderate amount	2. A little	1. Not at all	4. Very much	3. A moderate amount	5. An extreme amount	5. An extreme amount	1. Not at all	5. Completely	4. Mostly	4. Mostly	4. Mostly	3. Neither poor nor good	5. Very Satisfied	1. Very dissatisfied	1. Very dissatisfied	3. Neither satisfied nor dissatisfied	5. Very Satisfied	3. Neither satisfied nor dissatisfied	5. Very Satisfied	1. Very dissatisfied	1. Very dissatisfied	1. Very dissatisfied	5. Always
1	Somali	>23 Years	Single	Pharmacy	Second Year	Good	Dissatisfied	2. A little	4. Very much	2. A little	3. A moderate amount	1. Not at all	4. Very much	2. A little	3. Moderately	4. Mostly	1. Not at all	2. A little	1. Not at all	2. Poor	2. Dissatisfied	1. Very dissatisfied	1. Very dissatisfied	2. Dissatisfied	2. Dissatisfied	1. Very dissatisfied	1. Very dissatisfied	1. Very dissatisfied	3. Neither satisfied nor dissatisfied	4. Satisfied	4. Very often
1	Somalia	>23 Years	Single	Pharmacy	First year	Neither poor nor good	Very dissatisfied	1. Not at all	2. A little	1. Not at all	2. A little	2. A little	2. A little	2. A little	2. A little	2. A little	2. A little	2. A little	2. A little	3. Neither poor nor good	4. satisfied	2. Dissatisfied	2. Dissatisfied	2. Dissatisfied	2. Dissatisfied	5. Very Satisfied	2. Dissatisfied	1. Very dissatisfied	3. Neither satisfied nor dissatisfied	1. Very dissatisfied	5. Always
2	Somalia	20 -23 years	Single	Nursing	Forth year	Good	Very dissatisfied	2. A little	2. A little	4. Very much	5. An extreme amount	4. Very much	4. Very much	4. Very much	4. Mostly	3. Moderately	3. Moderately	5. Completely	2. A little	4. Good	4. satisfied	4. satisfied	4. satisfied	5. Very Satisfied	4. Satisfied	4. Satisfied	4. Satisfied	4. Satisfied	5. Very Satisfied	4. Satisfied	3. Quite often
2	Somalia	>23 Years	Single	Pharmacy	Fifth year	Very good	Satisfied Very	1. Not at all	1. Not at all	5. An extreme amount	5. An extreme amount	4. Very much	5. An extreme amount	5. An extreme amount	4. Mostly	5. Completely	4. Mostly	4. Mostly	1. Not at all	4. Good	4. satisfied	5. Very Satisfied	3. Neither satisfied nor dissatisfied	5. Very Satisfied	4. Satisfied	3. Neither satisfied nor dissatisfied	4. Satisfied	4. Satisfied	4. Satisfied	1. Very dissatisfied	2. Seldom
1	Somalia	>23 Years	Single	Laboratory	Fifth year	Very good	Satisfied Very	3. A moderate amount	1. Not at all	4. Very much	4. Very much	4. Very much	4. Very much	4. Very much	4. Mostly	4. Mostly	4. Mostly	4. Mostly	4. Mostly	5. Very good	5. Very Satisfied	5. Very Satisfied	5 .Very Satisfied	5. Very Satisfied	5. Very Satisfied	2. Dissatisfied	5. Very Satisfied	2. Dissatisfied	5. Very Satisfied	5. Very Satisfied	5. Always
2	Somalia	20 -23 years	Single	Pharmacy	Second Year	Neither poor nor good	Satisfied Very	1. Not at all	1. Not at all	4. Very much	2. A little	5. An extreme amount	5. An extreme amount	3. A moderate amount	4. Mostly	5. Completely	5. Completely	5. Completely	2. A little	5. Very good	4. satisfied	5. Very Satisfied	3. Neither satisfied nor dissatisfied	3. Neither satisfied nor dissatisfied	4. Satisfied	3. Neither satisfied nor dissatisfied	4. Satisfied	2. Dissatisfied	3. Neither satisfied nor dissatisfied	3. Neither satisfied nor dissatisfied	3. Quite often
1	Somalia	20 -23 years	Single	Pharmacy	Second Year	Good	Satisfied Very	4. Very much	2. A little	4. Very much	1. Not at all	3. A moderate amount	4. Very much	5. An extreme amount	4. Mostly	5. Completely	4. Mostly	5. Completely	2. A little	4. Good	2. Dissatisfied	4. satisfied	5 .Very Satisfied	5. Very Satisfied	5. Very Satisfied	4. Satisfied	2. Dissatisfied	2. Dissatisfied	4. Satisfied	5. Very Satisfied	4. Very often
2	Somalia	20 -23 years	Single	Laboratory	Forth year	Good	Satisfied Very	2. A little	1. Not at all	5. An extreme amount	4. Very much	3. A moderate amount	3. A moderate amount	3. A moderate amount	4. Mostly	5. Completely	4. Mostly	5. Completely	4. Mostly	4. Good	2. Dissatisfied	4. satisfied	4. satisfied	5. Very Satisfied	5. Very Satisfied	5. Very Satisfied	4. Satisfied	1. Very dissatisfied	3. Neither satisfied nor dissatisfied	3. Neither satisfied nor dissatisfied	5. Always
2	Somalia	20 -23 years	Single	Laboratory	Forth year	Good	Satisfied Very	2. A little	1. Not at all	3. A moderate amount	4. Very much	4. Very much	4. Very much	4. Very much	4. Mostly	4. Mostly	3. Moderately	3. Moderately	3. Moderately	4. Good	4. satisfied	4. satisfied	4. satisfied	4. Satisfied	4. Satisfied	5. Very Satisfied	5. Very Satisfied	3. Neither satisfied nor dissatisfied	4. Satisfied	3. Neither satisfied nor dissatisfied	3. Quite often
2	Somalia	< 20 years	Single	Pharmacy	First year	Good	Satisfied Very	1. Not at all	1. Not at all	2. A little	4. Very much	4. Very much	4. Very much	3. A moderate amount	5. Completely	5. Completely	4. Mostly	4. Mostly	2. A little	4. Good	2. Dissatisfied	4. satisfied	4. satisfied	5. Very Satisfied	5. Very Satisfied	3. Neither satisfied nor dissatisfied	4. Satisfied	4. Satisfied	3. Neither satisfied nor dissatisfied	4. Satisfied	2. Seldom
1	Somalia	>23 Years	Single	Pharmacy	Fifth year	Good	Satisfied Very	2. A little	5. An extreme amount	3. A moderate amount	2. A little	2. A little	4. Very much	3. A moderate amount	1. Not at all	3. Moderately	4. Mostly	3. Moderately	2. A little	4. Good	1. Very dissatisfied	4. satisfied	4. satisfied	4. Satisfied	5. Very Satisfied	5. Very Satisfied	5. Very Satisfied	4. Satisfied	3. Neither satisfied nor dissatisfied	4. Satisfied	1. Never
1	Somalia	>23 Years	Single	Pharmacy	Forth year	Very good	satisfied	1. Not at all	3. A moderate amount	4. Very much	3. A moderate amount	3. A moderate amount	3. A moderate amount	3. A moderate amount	3. Moderately	5. Completely	4. Mostly	3. Moderately	3. Moderately	4. Good	4. satisfied	4. satisfied	5 .Very Satisfied	4. Satisfied	5. Very Satisfied	3. Neither satisfied nor dissatisfied	4. Satisfied	4. Satisfied	4. Satisfied	4. Satisfied	2. Seldom
1	Somalia	20 -23 years	Single	Nursing	Forth year	Very good	satisfied	3. A moderate amount	3. A moderate amount	3. A moderate amount	3. A moderate amount	3. A moderate amount	3. A moderate amount	3. A moderate amount	3. Moderately	3. Moderately	2. A little	3. Moderately	3. Moderately	4. Good	4. satisfied	4. satisfied	4. satisfied	4. Satisfied	4. Satisfied	4. Satisfied	4. Satisfied	4. Satisfied	4. Satisfied	3. Neither satisfied nor dissatisfied	3. Quite often
2	Somalia	20 -23 years	Single	Laboratory	Forth year	Very good	satisfied	2. A little	1. Not at all	5. An extreme amount	4. Very much	5. An extreme amount	5. An extreme amount	5. An extreme amount	5. Completely	5. Completely	4. Mostly	4. Mostly	1. Not at all	5. Very good	5. Very Satisfied	5. Very Satisfied	5 .Very Satisfied	5. Very Satisfied	5. Very Satisfied	3. Neither satisfied nor dissatisfied	4. Satisfied	4. Satisfied	5. Very Satisfied	4. Satisfied	5. Always
2	Somalia	< 20 years	Single	Pharmacy	First year	Neither poor nor good	satisfied	3. A moderate amount	3. A moderate amount	3. A moderate amount	3. A moderate amount	4. Very much	4. Very much	4. Very much	4. Mostly	3. Moderately	2. A little	3. Moderately	3. Moderately	3. Neither poor nor good	3. Neither satisfied nor dissatisfied	3. Neither satisfied nor dissatisfied	3. Neither satisfied nor dissatisfied	3. Neither satisfied nor dissatisfied	3. Neither satisfied nor dissatisfied	3. Neither satisfied nor dissatisfied	3. Neither satisfied nor dissatisfied	3. Neither satisfied nor dissatisfied	3. Neither satisfied nor dissatisfied	3. Neither satisfied nor dissatisfied	3. Quite often
1	Somalia	20 -23 years	Single	Medicine	Third Year	Good	satisfied	3. A moderate amount	3. A moderate amount	3. A moderate amount	5. An extreme amount	3. A moderate amount	4. Very much	3. A moderate amount	3. Moderately	3. Moderately	3. Moderately	3. Moderately	3. Moderately	4. Good	3. Neither satisfied nor dissatisfied	3. Neither satisfied nor dissatisfied	4. satisfied	4. Satisfied	3. Neither satisfied nor dissatisfied	5. Very Satisfied	3. Neither satisfied nor dissatisfied	4. Satisfied	3. Neither satisfied nor dissatisfied	3. Neither satisfied nor dissatisfied	1. Never
2	Somalia	20 -23 years	Single	Nursing	Forth year	Good	satisfied	5. An extreme amount	2. A little	3. A moderate amount	3. A moderate amount	3. A moderate amount	3. A moderate amount	1. Not at all	3. Moderately	5. Completely	2. A little	3. Moderately	2. A little	4. Good	4. satisfied	4. satisfied	4. satisfied	4. Satisfied	4. Satisfied	4. Satisfied	4. Satisfied	4. Satisfied	2. Dissatisfied	2. Dissatisfied	4. Very often
1	Somalia	>23 Years	Single	Nursing	Forth year	Good	satisfied	4. Very much	2. A little	4. Very much	4. Very much	5. An extreme amount	4. Very much	4. Very much	4. Mostly	4. Mostly	3. Moderately	3. Moderately	4. Mostly	3. Neither poor nor good	4. satisfied	4. satisfied	3. Neither satisfied nor dissatisfied	3. Neither satisfied nor dissatisfied	4. Satisfied	4. Satisfied	4. Satisfied	2. Dissatisfied	2. Dissatisfied	4. Satisfied	3. Quite often
2	Somalia	>23 Years	Married	Dentistry	Forth year	Good	satisfied	2. A little	3. A moderate amount	2. A little	3. A moderate amount	3. A moderate amount	4. Very much	3. A moderate amount	4. Mostly	4. Mostly	3. Moderately	4. Mostly	2. A little	2. Poor	2. Dissatisfied	3. Neither satisfied nor dissatisfied	4. satisfied	3. Neither satisfied nor dissatisfied	3. Neither satisfied nor dissatisfied	4. Satisfied	4. Satisfied	3. Neither satisfied nor dissatisfied	3. Neither satisfied nor dissatisfied	4. Satisfied	3. Quite often
2	somalia	20 -23 years	Single	Pharmacy	Fifth year	Good	satisfied	1. Not at all	1. Not at all	4. Very much	4. Very much	3. A moderate amount	4. Very much	4. Very much	4. Mostly	5. Completely	2. A little	4. Mostly	2. A little	5. Very good	4. satisfied	5. Very Satisfied	4. satisfied	5. Very Satisfied	3. Neither satisfied nor dissatisfied	2. Dissatisfied	3. Neither satisfied nor dissatisfied	4. Satisfied	4. Satisfied	5. Very Satisfied	3. Quite often
2	Somalia	>23 Years	Others	Pharmacy	Fifth year	Good	satisfied	2. A little	3. A moderate amount	4. Very much	4. Very much	4. Very much	4. Very much	3. A moderate amount	4. Mostly	5. Completely	3. Moderately	4. Mostly	3. Moderately	2. Poor	3. Neither satisfied nor dissatisfied	3. Neither satisfied nor dissatisfied	3. Neither satisfied nor dissatisfied	5. Very Satisfied	4. Satisfied	1. Very dissatisfied	4. Satisfied	4. Satisfied	2. Dissatisfied	4. Satisfied	3. Quite often
1	Somalia	>23 Years	Single	Medicine	Fifth year	Good	satisfied	1. Not at all	1. Not at all	4. Very much	4. Very much	3. A moderate amount	5. An extreme amount	4. Very much	4. Mostly	2. A little	3. Moderately	3. Moderately	3. Moderately	3. Neither poor nor good	5. Very Satisfied	4. satisfied	4. satisfied	5. Very Satisfied	4. Satisfied	4. Satisfied	4. Satisfied	3. Neither satisfied nor dissatisfied	4. Satisfied	4. Satisfied	1. Never
1	Somalia	>23 Years	Single	Medicine	Fifth year	Good	satisfied	1. Not at all	1. Not at all	4. Very much	4. Very much	3. A moderate amount	5. An extreme amount	4. Very much	4. Mostly	2. A little	3. Moderately	3. Moderately	3. Moderately	3. Neither poor nor good	5. Very Satisfied	4. satisfied	4. satisfied	5. Very Satisfied	4. Satisfied	4. Satisfied	4. Satisfied	3. Neither satisfied nor dissatisfied	4. Satisfied	4. Satisfied	1. Never
2	Somalia	>23 Years	Married	Medicine	Fifth year	Good	satisfied	3. A moderate amount	2. A little	4. Very much	4. Very much	5. An extreme amount	4. Very much	3. A moderate amount	1. Not at all	5. Completely	4. Mostly	2. A little	5. Completely	4. Good	1. Very dissatisfied	2. Dissatisfied	3. Neither satisfied nor dissatisfied	4. Satisfied	3. Neither satisfied nor dissatisfied	2. Dissatisfied	3. Neither satisfied nor dissatisfied	5. Very Satisfied	1. Very dissatisfied	4. Satisfied	1. Never
1	Somalia	>23 Years	Single	Medicine	Forth year	Neither poor nor good	Neither satisfied nor dissatisfied	3. A moderate amount	5. An extreme amount	2. A little	2. A little	2. A little	2. A little	2. A little	2. A little	5. Completely	1. Not at all	2. A little	2. A little	3. Neither poor nor good	1. Very dissatisfied	2. Dissatisfied	2. Dissatisfied	3. Neither satisfied nor dissatisfied	1. Very dissatisfied	3. Neither satisfied nor dissatisfied	3. Neither satisfied nor dissatisfied	3. Neither satisfied nor dissatisfied	3. Neither satisfied nor dissatisfied	4. Satisfied	5. Always
1	Somalia	>23 Years	Single	Laboratory	Forth year	Very good	Neither satisfied nor dissatisfied	2. A little	5. An extreme amount	3. A moderate amount	5. An extreme amount	3. A moderate amount	2. A little	1. Not at all	2. A little	3. Moderately	4. Mostly	4. Mostly	4. Mostly	1. Very poor	5. Very Satisfied	4. satisfied	2. Dissatisfied	4. Satisfied	5. Very Satisfied	1. Very dissatisfied	2. Dissatisfied	2. Dissatisfied	1. Very dissatisfied	2. Dissatisfied	1. Never
2	Somalian	>23 Years	Others	Medicine	Forth year	Poor	satisfied	2. A little	3. A moderate amount	4. Very much	4. Very much	5. An extreme amount	4. Very much	4. Very much	1. Not at all	4. Mostly	4. Mostly	1. Not at all	5. Completely	3. Neither poor nor good	1. Very dissatisfied	4. satisfied	3. Neither satisfied nor dissatisfied	4. Satisfied	3. Neither satisfied nor dissatisfied	3. Neither satisfied nor dissatisfied	5. Very Satisfied	3. Neither satisfied nor dissatisfied	3. Neither satisfied nor dissatisfied	1. Very dissatisfied	5. Always
2	Somalian	< 20 years	Single	Medicine	Second Year	Good	satisfied	1. Not at all	1. Not at all	4. Very much	4. Very much	3. A moderate amount	3. A moderate amount	4. Very much	3. Moderately	5. Completely	4. Mostly	4. Mostly	3. Moderately	4. Good	5. Very Satisfied	4. satisfied	4. satisfied	5. Very Satisfied	4. Satisfied	3. Neither satisfied nor dissatisfied	4. Satisfied	3. Neither satisfied nor dissatisfied	3. Neither satisfied nor dissatisfied	2. Dissatisfied	1. Never
2	Somalian	20 -23 years	Single	Dentistry	Second Year	Good	satisfied	2. A little	1. Not at all	3. A moderate amount	4. Very much	3. A moderate amount	3. A moderate amount	3. A moderate amount	3. Moderately	4. Mostly	4. Mostly	3. Moderately	3. Moderately	4. Good	4. satisfied	4. satisfied	3. Neither satisfied nor dissatisfied	4. Satisfied	4. Satisfied	3. Neither satisfied nor dissatisfied	4. Satisfied	4. Satisfied	2. Dissatisfied	2. Dissatisfied	2. Seldom
2	Somalian	20 -23 years	Single	Dentistry	Second Year	Good	satisfied	2. A little	1. Not at all	3. A moderate amount	4. Very much	3. A moderate amount	3. A moderate amount	3. A moderate amount	3. Moderately	4. Mostly	4. Mostly	3. Moderately	3. Moderately	4. Good	4. satisfied	4. satisfied	3. Neither satisfied nor dissatisfied	4. Satisfied	4. Satisfied	3. Neither satisfied nor dissatisfied	4. Satisfied	4. Satisfied	2. Dissatisfied	2. Dissatisfied	2. Seldom
2	Somalian	20 -23 years	Married	Pharmacy	Forth year	Good	satisfied	3. A moderate amount	2. A little	4. Very much	3. A moderate amount	3. A moderate amount	3. A moderate amount	3. A moderate amount	4. Mostly	4. Mostly	4. Mostly	3. Moderately	3. Moderately	4. Good	4. satisfied	3. Neither satisfied nor dissatisfied	4. satisfied	4. Satisfied	4. Satisfied	4. Satisfied	4. Satisfied	4. Satisfied	4. Satisfied	4. Satisfied	1. Never
2	Somalian	>23 Years	Divorced	Pharmacy	Fifth year	Poor	Dissatisfied	3. A moderate amount	3. A moderate amount	3. A moderate amount	3. A moderate amount	3. A moderate amount	3. A moderate amount	3. A moderate amount	3. Moderately	3. Moderately	2. A little	2. A little	3. Moderately	3. Neither poor nor good	3. Neither satisfied nor dissatisfied	3. Neither satisfied nor dissatisfied	2. Dissatisfied	3. Neither satisfied nor dissatisfied	4. Satisfied	3. Neither satisfied nor dissatisfied	4. Satisfied	5. Very Satisfied	3. Neither satisfied nor dissatisfied	3. Neither satisfied nor dissatisfied	2. Seldom
2	Somaliland	20 -23 years	Single	Laboratory	Forth year	Very poor	Very dissatisfied	1. Not at all	3. A moderate amount	2. A little	2. A little	1. Not at all	1. Not at all	1. Not at all	1. Not at all	1. Not at all	1. Not at all	2. A little	2. A little	2. Poor	1. Very dissatisfied	4. satisfied	5 .Very Satisfied	1. Very dissatisfied	2. Dissatisfied	2. Dissatisfied	2. Dissatisfied	2. Dissatisfied	3. Neither satisfied nor dissatisfied	2. Dissatisfied	4. Very often
1	Somaliland	20 -23 years	Married	Medicine	Second Year	Good	satisfied	1. Not at all	3. A moderate amount	3. A moderate amount	4. Very much	2. A little	3. A moderate amount	2. A little	3. Moderately	4. Mostly	3. Moderately	4. Mostly	1. Not at all	3. Neither poor nor good	4. satisfied	4. satisfied	3. Neither satisfied nor dissatisfied	4. Satisfied	3. Neither satisfied nor dissatisfied	2. Dissatisfied	3. Neither satisfied nor dissatisfied	2. Dissatisfied	3. Neither satisfied nor dissatisfied	2. Dissatisfied	4. Very often
2	Somalilander	20 -23 years	Single	Pharmacy	First year	Very good	satisfied	2. A little	1. Not at all	4. Very much	4. Very much	4. Very much	3. A moderate amount	3. A moderate amount	4. Mostly	4. Mostly	4. Mostly	4. Mostly	2. A little	4. Good	5. Very Satisfied	3. Neither satisfied nor dissatisfied	4. satisfied	5. Very Satisfied	4. Satisfied	3. Neither satisfied nor dissatisfied	5. Very Satisfied	5. Very Satisfied	3. Neither satisfied nor dissatisfied	3. Neither satisfied nor dissatisfied	3. Quite often
2	somilian	>23 Years	Others	Medicine	Forth year	Good	Neither satisfied nor dissatisfied	1. Not at all	1. Not at all	3. A moderate amount	4. Very much	5. An extreme amount	3. A moderate amount	3. A moderate amount	4. Mostly	4. Mostly	5. Completely	3. Moderately	3. Moderately	3. Neither poor nor good	4. satisfied	4. satisfied	3. Neither satisfied nor dissatisfied	3. Neither satisfied nor dissatisfied	2. Dissatisfied	3. Neither satisfied nor dissatisfied	4. Satisfied	4. Satisfied	4. Satisfied	3. Neither satisfied nor dissatisfied	2. Seldom
2	somilian	>23 Years	Others	Medicine	Forth year	Good	Neither satisfied nor dissatisfied	1. Not at all	1. Not at all	3. A moderate amount	4. Very much	5. An extreme amount	3. A moderate amount	3. A moderate amount	4. Mostly	4. Mostly	5. Completely	3. Moderately	3. Moderately	3. Neither poor nor good	4. satisfied	4. satisfied	3. Neither satisfied nor dissatisfied	3. Neither satisfied nor dissatisfied	2. Dissatisfied	3. Neither satisfied nor dissatisfied	4. Satisfied	4. Satisfied	4. Satisfied	3. Neither satisfied nor dissatisfied	2. Seldom
1	Soomali	20 -23 years	Single	Nursing	Fifth year	Good	Satisfied Very	4. Very much	4. Very much	4. Very much	4. Very much	4. Very much	4. Very much	4. Very much	4. Mostly	4. Mostly	4. Mostly	4. Mostly	4. Mostly	4. Good	4. satisfied	4. satisfied	4. satisfied	1. Very dissatisfied	1. Very dissatisfied	4. Satisfied	1. Very dissatisfied	2. Dissatisfied	4. Satisfied	5. Very Satisfied	5. Always
1	Soomali	20 -23 years	Single	Laboratory	Forth year	Very good	satisfied	3. A moderate amount	3. A moderate amount	4. Very much	5. An extreme amount	3. A moderate amount	4. Very much	4. Very much	3. Moderately	4. Mostly	3. Moderately	3. Moderately	3. Moderately	4. Good	3. Neither satisfied nor dissatisfied	3. Neither satisfied nor dissatisfied	4. satisfied	4. Satisfied	4. Satisfied	5. Very Satisfied	4. Satisfied	3. Neither satisfied nor dissatisfied	2. Dissatisfied	5. Very Satisfied	5. Always
2	Sudan	>23 Years	Divorced	Nursing	Forth year	Very good	Satisfied Very	4. Very much	2. A little	4. Very much	5. An extreme amount	4. Very much	4. Very much	4. Very much	5. Completely	5. Completely	3. Moderately	3. Moderately	2. A little	4. Good	5. Very Satisfied	4. satisfied	5 .Very Satisfied	4. Satisfied	2. Dissatisfied	4. Satisfied	4. Satisfied	5. Very Satisfied	3. Neither satisfied nor dissatisfied	4. Satisfied	2. Seldom
2	sudan	< 20 years	Single	Nursing	First year	Good	Satisfied Very	1. Not at all	1. Not at all	4. Very much	4. Very much	3. A moderate amount	4. Very much	3. A moderate amount	2. A little	4. Mostly	2. A little	5. Completely	4. Mostly	4. Good	4. satisfied	5. Very Satisfied	4. satisfied	5. Very Satisfied	5. Very Satisfied	3. Neither satisfied nor dissatisfied	5. Very Satisfied	4. Satisfied	5. Very Satisfied	4. Satisfied	1. Never
1	Sudan	20 -23 years	Divorced	Laboratory	Fifth year	Very good	satisfied	4. Very much	4. Very much	4. Very much	1. Not at all	3. A moderate amount	3. A moderate amount	5. An extreme amount	3. Moderately	2. A little	3. Moderately	3. Moderately	4. Mostly	2. Poor	3. Neither satisfied nor dissatisfied	4. satisfied	3. Neither satisfied nor dissatisfied	1. Very dissatisfied	3. Neither satisfied nor dissatisfied	2. Dissatisfied	4. Satisfied	1. Very dissatisfied	2. Dissatisfied	3. Neither satisfied nor dissatisfied	2. Seldom
2	Sudan	>23 Years	Married	Medicine	Fifth year	Neither poor nor good	satisfied	3. A moderate amount	3. A moderate amount	3. A moderate amount	3. A moderate amount	3. A moderate amount	3. A moderate amount	3. A moderate amount	3. Moderately	3. Moderately	3. Moderately	3. Moderately	3. Moderately	3. Neither poor nor good	3. Neither satisfied nor dissatisfied	3. Neither satisfied nor dissatisfied	3. Neither satisfied nor dissatisfied	3. Neither satisfied nor dissatisfied	3. Neither satisfied nor dissatisfied	3. Neither satisfied nor dissatisfied	3. Neither satisfied nor dissatisfied	3. Neither satisfied nor dissatisfied	3. Neither satisfied nor dissatisfied	3. Neither satisfied nor dissatisfied	3. Quite often
1	Sudan	>23 Years	Married	Medicine	Third Year	Good	satisfied	2. A little	3. A moderate amount	2. A little	4. Very much	4. Very much	3. A moderate amount	2. A little	2. A little	3. Moderately	3. Moderately	3. Moderately	3. Moderately	2. Poor	3. Neither satisfied nor dissatisfied	3. Neither satisfied nor dissatisfied	3. Neither satisfied nor dissatisfied	4. Satisfied	3. Neither satisfied nor dissatisfied	4. Satisfied	3. Neither satisfied nor dissatisfied	2. Dissatisfied	2. Dissatisfied	2. Dissatisfied	3. Quite often
1	Sudan	>23 Years	Married	Dentistry	Third Year	Good	satisfied	2. A little	3. A moderate amount	3. A moderate amount	3. A moderate amount	4. Very much	2. A little	3. A moderate amount	3. Moderately	3. Moderately	2. A little	3. Moderately	2. A little	3. Neither poor nor good	3. Neither satisfied nor dissatisfied	4. satisfied	3. Neither satisfied nor dissatisfied	4. Satisfied	3. Neither satisfied nor dissatisfied	4. Satisfied	3. Neither satisfied nor dissatisfied	2. Dissatisfied	3. Neither satisfied nor dissatisfied	2. Dissatisfied	2. Seldom
2	Sudan	20 -23 years	Single	Dentistry	Forth year	Good	satisfied	4. Very much	2. A little	4. Very much	4. Very much	4. Very much	4. Very much	4. Very much	5. Completely	5. Completely	5. Completely	4. Mostly	4. Mostly	4. Good	3. Neither satisfied nor dissatisfied	4. satisfied	4. satisfied	4. Satisfied	4. Satisfied	4. Satisfied	4. Satisfied	4. Satisfied	3. Neither satisfied nor dissatisfied	4. Satisfied	2. Seldom
2	Sudan	20 -23 years	Single	Dentistry	Forth year	Good	satisfied	3. A moderate amount	3. A moderate amount	4. Very much	4. Very much	4. Very much	4. Very much	4. Very much	4. Mostly	5. Completely	3. Moderately	4. Mostly	3. Moderately	4. Good	3. Neither satisfied nor dissatisfied	4. satisfied	4. satisfied	4. Satisfied	4. Satisfied	4. Satisfied	4. Satisfied	4. Satisfied	3. Neither satisfied nor dissatisfied	4. Satisfied	2. Seldom
2	Sudan	20 -23 years	Single	Dentistry	Forth year	Good	satisfied	2. A little	2. A little	4. Very much	4. Very much	4. Very much	4. Very much	4. Very much	4. Mostly	5. Completely	3. Moderately	4. Mostly	2. A little	4. Good	3. Neither satisfied nor dissatisfied	4. satisfied	4. satisfied	4. Satisfied	4. Satisfied	4. Satisfied	4. Satisfied	4. Satisfied	3. Neither satisfied nor dissatisfied	4. Satisfied	2. Seldom
2	Sudan	20 -23 years	Single	Dentistry	Forth year	Good	satisfied	2. A little	2. A little	2. A little	4. Very much	4. Very much	4. Very much	4. Very much	4. Mostly	5. Completely	3. Moderately	4. Mostly	3. Moderately	4. Good	3. Neither satisfied nor dissatisfied	4. satisfied	4. satisfied	4. Satisfied	4. Satisfied	4. Satisfied	4. Satisfied	4. Satisfied	3. Neither satisfied nor dissatisfied	4. Satisfied	2. Seldom
1	Sudan	< 20 years	Single	Dentistry	Forth year	Good	satisfied	2. A little	2. A little	4. Very much	4. Very much	4. Very much	4. Very much	4. Very much	4. Mostly	5. Completely	3. Moderately	4. Mostly	3. Moderately	4. Good	3. Neither satisfied nor dissatisfied	4. satisfied	4. satisfied	4. Satisfied	4. Satisfied	4. Satisfied	4. Satisfied	4. Satisfied	3. Neither satisfied nor dissatisfied	4. Satisfied	2. Seldom
1	Sudan	< 20 years	Single	Dentistry	Forth year	Good	satisfied	2. A little	3. A moderate amount	4. Very much	4. Very much	4. Very much	4. Very much	4. Very much	3. Moderately	5. Completely	3. Moderately	3. Moderately	2. A little	4. Good	3. Neither satisfied nor dissatisfied	4. satisfied	4. satisfied	4. Satisfied	4. Satisfied	4. Satisfied	4. Satisfied	4. Satisfied	4. Satisfied	4. Satisfied	2. Seldom
1	Sudan	20 -23 years	Single	Medicine	Third Year	Neither poor nor good	Neither satisfied nor dissatisfied	2. A little	3. A moderate amount	4. Very much	2. A little	3. A moderate amount	3. A moderate amount	4. Very much	3. Moderately	3. Moderately	3. Moderately	3. Moderately	3. Moderately	2. Poor	2. Dissatisfied	3. Neither satisfied nor dissatisfied	3. Neither satisfied nor dissatisfied	3. Neither satisfied nor dissatisfied	4. Satisfied	4. Satisfied	2. Dissatisfied	3. Neither satisfied nor dissatisfied	3. Neither satisfied nor dissatisfied	3. Neither satisfied nor dissatisfied	2. Seldom
1	Sudan	< 20 years	Single	Medicine	Second Year	Neither poor nor good	Neither satisfied nor dissatisfied	3. A moderate amount	3. A moderate amount	4. Very much	2. A little	3. A moderate amount	3. A moderate amount	2. A little	2. A little	4. Mostly	2. A little	3. Moderately	4. Mostly	3. Neither poor nor good	3. Neither satisfied nor dissatisfied	4. satisfied	4. satisfied	2. Dissatisfied	3. Neither satisfied nor dissatisfied	3. Neither satisfied nor dissatisfied	3. Neither satisfied nor dissatisfied	2. Dissatisfied	2. Dissatisfied	2. Dissatisfied	3. Quite often
2	Sudan	< 20 years	Single	Nursing	First year	Neither poor nor good	Neither satisfied nor dissatisfied	2. A little	3. A moderate amount	2. A little	3. A moderate amount	3. A moderate amount	2. A little	1. Not at all	1. Not at all	3. Moderately	2. A little	3. Moderately	1. Not at all	2. Poor	2. Dissatisfied	2. Dissatisfied	1. Very dissatisfied	4. Satisfied	2. Dissatisfied	3. Neither satisfied nor dissatisfied	4. Satisfied	3. Neither satisfied nor dissatisfied	3. Neither satisfied nor dissatisfied	2. Dissatisfied	4. Very often
2	Sudan	>23 Years	Single	Nursing	Third Year	Good	Neither satisfied nor dissatisfied	3. A moderate amount	3. A moderate amount	4. Very much	4. Very much	4. Very much	4. Very much	4. Very much	4. Mostly	5. Completely	3. Moderately	3. Moderately	3. Moderately	4. Good	3. Neither satisfied nor dissatisfied	3. Neither satisfied nor dissatisfied	5 .Very Satisfied	3. Neither satisfied nor dissatisfied	3. Neither satisfied nor dissatisfied	4. Satisfied	3. Neither satisfied nor dissatisfied	4. Satisfied	3. Neither satisfied nor dissatisfied	4. Satisfied	2. Seldom
1	Sudan	20 -23 years	Married	Medicine	Third Year	Good	Neither satisfied nor dissatisfied	2. A little	2. A little	3. A moderate amount	4. Very much	3. A moderate amount	3. A moderate amount	2. A little	1. Not at all	4. Mostly	3. Moderately	4. Mostly	3. Moderately	3. Neither poor nor good	3. Neither satisfied nor dissatisfied	4. satisfied	3. Neither satisfied nor dissatisfied	4. Satisfied	4. Satisfied	3. Neither satisfied nor dissatisfied	3. Neither satisfied nor dissatisfied	2. Dissatisfied	2. Dissatisfied	2. Dissatisfied	3. Quite often
2	Sudan	20 -23 years	Single	Pharmacy	Second Year	Good	Neither satisfied nor dissatisfied	2. A little	5. An extreme amount	3. A moderate amount	4. Very much	3. A moderate amount	3. A moderate amount	3. A moderate amount	2. A little	1. Not at all	4. Mostly	3. Moderately	1. Not at all	2. Poor	2. Dissatisfied	2. Dissatisfied	3. Neither satisfied nor dissatisfied	3. Neither satisfied nor dissatisfied	4. Satisfied	4. Satisfied	4. Satisfied	4. Satisfied	2. Dissatisfied	1. Very dissatisfied	5. Always
2	Sudan	20 -23 years	Single	Nursing	Forth year	Good	Neither satisfied nor dissatisfied	3. A moderate amount	3. A moderate amount	4. Very much	4. Very much	4. Very much	4. Very much	4. Very much	4. Mostly	5. Completely	3. Moderately	4. Mostly	2. A little	3. Neither poor nor good	3. Neither satisfied nor dissatisfied	4. satisfied	4. satisfied	4. Satisfied	4. Satisfied	4. Satisfied	4. Satisfied	4. Satisfied	3. Neither satisfied nor dissatisfied	4. Satisfied	2. Seldom
2	Sudan	20 -23 years	Married	Nursing	Forth year	Good	Neither satisfied nor dissatisfied	2. A little	3. A moderate amount	4. Very much	4. Very much	4. Very much	4. Very much	4. Very much	4. Mostly	5. Completely	3. Moderately	4. Mostly	3. Moderately	4. Good	3. Neither satisfied nor dissatisfied	3. Neither satisfied nor dissatisfied	3. Neither satisfied nor dissatisfied	3. Neither satisfied nor dissatisfied	4. Satisfied	4. Satisfied	4. Satisfied	4. Satisfied	4. Satisfied	4. Satisfied	3. Quite often
2	Sudan	20 -23 years	Married	Nursing	Forth year	Good	Neither satisfied nor dissatisfied	2. A little	2. A little	4. Very much	4. Very much	4. Very much	4. Very much	4. Very much	3. Moderately	5. Completely	2. A little	3. Moderately	2. A little	3. Neither poor nor good	3. Neither satisfied nor dissatisfied	4. satisfied	4. satisfied	3. Neither satisfied nor dissatisfied	4. Satisfied	4. Satisfied	4. Satisfied	4. Satisfied	4. Satisfied	4. Satisfied	2. Seldom
2	Sudan	< 20 years	Single	Nursing	First year	Good	Neither satisfied nor dissatisfied	3. A moderate amount	1. Not at all	4. Very much	4. Very much	3. A moderate amount	4. Very much	4. Very much	2. A little	3. Moderately	4. Mostly	3. Moderately	3. Moderately	3. Neither poor nor good	5. Very Satisfied	4. satisfied	2. Dissatisfied	4. Satisfied	2. Dissatisfied	4. Satisfied	1. Very dissatisfied	3. Neither satisfied nor dissatisfied	4. Satisfied	4. Satisfied	3. Quite often
2	Sudan	< 20 years	Single	Nursing	First year	Good	Neither satisfied nor dissatisfied	2. A little	2. A little	3. A moderate amount	3. A moderate amount	3. A moderate amount	2. A little	3. A moderate amount	2. A little	4. Mostly	4. Mostly	3. Moderately	2. A little	4. Good	2. Dissatisfied	2. Dissatisfied	1. Very dissatisfied	3. Neither satisfied nor dissatisfied	4. Satisfied	3. Neither satisfied nor dissatisfied	2. Dissatisfied	2. Dissatisfied	2. Dissatisfied	2. Dissatisfied	4. Very often
2	Sudan	< 20 years	Single	Nursing	First year	Very poor	Dissatisfied	5. An extreme amount	1. Not at all	2. A little	3. A moderate amount	3. A moderate amount	2. A little	3. A moderate amount	1. Not at all	4. Mostly	4. Mostly	3. Moderately	1. Not at all	4. Good	1. Very dissatisfied	1. Very dissatisfied	2. Dissatisfied	1. Very dissatisfied	3. Neither satisfied nor dissatisfied	5. Very Satisfied	5. Very Satisfied	4. Satisfied	3. Neither satisfied nor dissatisfied	5. Very Satisfied	5. Always
1	Sudan	>23 Years	Married	Medicine	Third Year	Neither poor nor good	Dissatisfied	4. Very much	3. A moderate amount	4. Very much	4. Very much	4. Very much	5. An extreme amount	4. Very much	3. Moderately	3. Moderately	4. Mostly	5. Completely	3. Moderately	4. Good	3. Neither satisfied nor dissatisfied	4. satisfied	3. Neither satisfied nor dissatisfied	4. Satisfied	4. Satisfied	4. Satisfied	4. Satisfied	3. Neither satisfied nor dissatisfied	3. Neither satisfied nor dissatisfied	3. Neither satisfied nor dissatisfied	3. Quite often
1	Sudan	>23 Years	Single	Medicine	Second Year	Neither poor nor good	Dissatisfied	1. Not at all	2. A little	2. A little	1. Not at all	3. A moderate amount	5. An extreme amount	5. An extreme amount	4. Mostly	5. Completely	3. Moderately	5. Completely	3. Moderately	4. Good	5. Very Satisfied	3. Neither satisfied nor dissatisfied	5 .Very Satisfied	3. Neither satisfied nor dissatisfied	2. Dissatisfied	3. Neither satisfied nor dissatisfied	4. Satisfied	4. Satisfied	2. Dissatisfied	2. Dissatisfied	2. Seldom
2	Sudan	< 20 years	Single	Nursing	First year	Neither poor nor good	Dissatisfied	2. A little	2. A little	1. Not at all	3. A moderate amount	2. A little	3. A moderate amount	2. A little	1. Not at all	1. Not at all	1. Not at all	2. A little	1. Not at all	2. Poor	1. Very dissatisfied	2. Dissatisfied	2. Dissatisfied	2. Dissatisfied	3. Neither satisfied nor dissatisfied	3. Neither satisfied nor dissatisfied	1. Very dissatisfied	2. Dissatisfied	2. Dissatisfied	2. Dissatisfied	5. Always
2	Sudanease	>23 Years	Single	Medicine	Fifth year	Very good	satisfied	2. A little	1. Not at all	4. Very much	5. An extreme amount	4. Very much	4. Very much	3. A moderate amount	3. Moderately	5. Completely	4. Mostly	4. Mostly	4. Mostly	4. Good	2. Dissatisfied	4. satisfied	4. satisfied	5. Very Satisfied	4. Satisfied	3. Neither satisfied nor dissatisfied	4. Satisfied	4. Satisfied	4. Satisfied	4. Satisfied	3. Quite often
2	Sudanease	< 20 years	Single	Nursing	Second Year	Good	Dissatisfied	1. Not at all	1. Not at all	2. A little	4. Very much	2. A little	1. Not at all	1. Not at all	3. Moderately	3. Moderately	3. Moderately	1. Not at all	1. Not at all	4. Good	5. Very Satisfied	1. Very dissatisfied	1. Very dissatisfied	2. Dissatisfied	1. Very dissatisfied	1. Very dissatisfied	1. Very dissatisfied	2. Dissatisfied	1. Very dissatisfied	1. Very dissatisfied	3. Quite often
2	Sudanece	< 20 years	Single	Nursing	First year	Very poor	Satisfied Very	1. Not at all	1. Not at all	3. A moderate amount	3. A moderate amount	3. A moderate amount	4. Very much	3. A moderate amount	5. Completely	5. Completely	2. A little	2. A little	1. Not at all	2. Poor	2. Dissatisfied	1. Very dissatisfied	3. Neither satisfied nor dissatisfied	3. Neither satisfied nor dissatisfied	1. Very dissatisfied	4. Satisfied	4. Satisfied	4. Satisfied	4. Satisfied	3. Neither satisfied nor dissatisfied	1. Never
2	Sudanes	20 -23 years	Single	Laboratory	Forth year	Neither poor nor good	satisfied	4. Very much	1. Not at all	3. A moderate amount	1. Not at all	4. Very much	3. A moderate amount	2. A little	2. A little	1. Not at all	1. Not at all	4. Mostly	2. A little	2. Poor	4. satisfied	1. Very dissatisfied	1. Very dissatisfied	5. Very Satisfied	2. Dissatisfied	1. Very dissatisfied	1. Very dissatisfied	4. Satisfied	1. Very dissatisfied	2. Dissatisfied	2. Seldom
2	Sudanes	< 20 years	Single	Nursing	First year	Neither poor nor good	satisfied	3. A moderate amount	4. Very much	3. A moderate amount	4. Very much	3. A moderate amount	3. A moderate amount	3. A moderate amount	2. A little	4. Mostly	5. Completely	3. Moderately	2. A little	4. Good	2. Dissatisfied	4. satisfied	4. satisfied	4. Satisfied	4. Satisfied	4. Satisfied	4. Satisfied	3. Neither satisfied nor dissatisfied	4. Satisfied	3. Neither satisfied nor dissatisfied	3. Quite often
2	Sudanes	20 -23 years	Married	Nursing	Third Year	Good	satisfied	3. A moderate amount	3. A moderate amount	2. A little	4. Very much	4. Very much	3. A moderate amount	3. A moderate amount	3. Moderately	4. Mostly	3. Moderately	2. A little	3. Moderately	4. Good	4. satisfied	3. Neither satisfied nor dissatisfied	3. Neither satisfied nor dissatisfied	4. Satisfied	3. Neither satisfied nor dissatisfied	3. Neither satisfied nor dissatisfied	4. Satisfied	2. Dissatisfied	4. Satisfied	2. Dissatisfied	3. Quite often
2	Sudanes	< 20 years	Single	Dentistry	Second Year	Very good	Neither satisfied nor dissatisfied	2. A little	1. Not at all	2. A little	1. Not at all	2. A little	4. Very much	4. Very much	4. Mostly	1. Not at all	2. A little	2. A little	1. Not at all	3. Neither poor nor good	4. satisfied	2. Dissatisfied	4. satisfied	4. Satisfied	4. Satisfied	3. Neither satisfied nor dissatisfied	4. Satisfied	4. Satisfied	4. Satisfied	2. Dissatisfied	3. Quite often
2	Sudanes	>23 Years	Single	Medicine	Fifth year	Good	Dissatisfied	4. Very much	3. A moderate amount	2. A little	2. A little	2. A little	2. A little	2. A little	1. Not at all	5. Completely	1. Not at all	3. Moderately	2. A little	1. Very poor	4. satisfied	2. Dissatisfied	2. Dissatisfied	3. Neither satisfied nor dissatisfied	2. Dissatisfied	2. Dissatisfied	3. Neither satisfied nor dissatisfied	3. Neither satisfied nor dissatisfied	3. Neither satisfied nor dissatisfied	3. Neither satisfied nor dissatisfied	3. Quite often
2	Sudanese	< 20 years	Single	Nursing	First year	Very good	Satisfied Very	1. Not at all	1. Not at all	4. Very much	3. A moderate amount	2. A little	3. A moderate amount	3. A moderate amount	3. Moderately	5. Completely	3. Moderately	3. Moderately	3. Moderately	5. Very good	1. Very dissatisfied	2. Dissatisfied	4. satisfied	5. Very Satisfied	2. Dissatisfied	5. Very Satisfied	2. Dissatisfied	5. Very Satisfied	1. Very dissatisfied	3. Neither satisfied nor dissatisfied	4. Very often
2	Sudanese	< 20 years	Single	Laboratory	First year	Neither poor nor good	Satisfied Very	4. Very much	1. Not at all	3. A moderate amount	4. Very much	3. A moderate amount	4. Very much	3. A moderate amount	4. Mostly	4. Mostly	2. A little	3. Moderately	3. Moderately	5. Very good	5. Very Satisfied	4. satisfied	4. satisfied	4. Satisfied	4. Satisfied	4. Satisfied	4. Satisfied	3. Neither satisfied nor dissatisfied	2. Dissatisfied	3. Neither satisfied nor dissatisfied	3. Quite often
2	Sudanese	>23 Years	Single	Nursing	First year	Good	Satisfied Very	2. A little	1. Not at all	4. Very much	4. Very much	3. A moderate amount	4. Very much	4. Very much	5. Completely	5. Completely	5. Completely	3. Moderately	4. Mostly	4. Good	2. Dissatisfied	3. Neither satisfied nor dissatisfied	4. satisfied	5. Very Satisfied	5. Very Satisfied	5. Very Satisfied	5. Very Satisfied	5. Very Satisfied	5. Very Satisfied	5. Very Satisfied	2. Seldom
2	Sudanese	>23 Years	Single	Nursing	First year	Good	Satisfied Very	1. Not at all	1. Not at all	4. Very much	4. Very much	3. A moderate amount	3. A moderate amount	3. A moderate amount	4. Mostly	5. Completely	2. A little	2. A little	2. A little	4. Good	1. Very dissatisfied	2. Dissatisfied	4. satisfied	4. Satisfied	4. Satisfied	5. Very Satisfied	4. Satisfied	4. Satisfied	4. Satisfied	4. Satisfied	3. Quite often
2	Sudanese	< 20 years	Single	Nursing	First year	Good	Satisfied Very	3. A moderate amount	3. A moderate amount	4. Very much	5. An extreme amount	4. Very much	3. A moderate amount	3. A moderate amount	3. Moderately	5. Completely	4. Mostly	3. Moderately	2. A little	4. Good	4. satisfied	2. Dissatisfied	3. Neither satisfied nor dissatisfied	3. Neither satisfied nor dissatisfied	4. Satisfied	5. Very Satisfied	4. Satisfied	4. Satisfied	5. Very Satisfied	3. Neither satisfied nor dissatisfied	4. Very often
1	Sudanese	20 -23 years	Single	Laboratory	Forth year	Very good	satisfied	1. Not at all	1. Not at all	3. A moderate amount	3. A moderate amount	3. A moderate amount	4. Very much	3. A moderate amount	5. Completely	5. Completely	4. Mostly	3. Moderately	3. Moderately	5. Very good	4. satisfied	4. satisfied	4. satisfied	4. Satisfied	4. Satisfied	4. Satisfied	4. Satisfied	4. Satisfied	4. Satisfied	4. Satisfied	3. Quite often
1	Sudanese	>23 Years	Married	Medicine	Fifth year	Very good	satisfied	3. A moderate amount	3. A moderate amount	3. A moderate amount	5. An extreme amount	4. Very much	5. An extreme amount	5. An extreme amount	4. Mostly	5. Completely	5. Completely	5. Completely	5. Completely	4. Good	4. satisfied	4. satisfied	4. satisfied	4. Satisfied	4. Satisfied	5. Very Satisfied	4. Satisfied	5. Very Satisfied	5. Very Satisfied	5. Very Satisfied	2. Seldom
2	Sudanese	20 -23 years	Single	Medicine	Third Year	Neither poor nor good	satisfied	2. A little	2. A little	3. A moderate amount	4. Very much	4. Very much	3. A moderate amount	3. A moderate amount	3. Moderately	4. Mostly	4. Mostly	5. Completely	3. Moderately	3. Neither poor nor good	2. Dissatisfied	3. Neither satisfied nor dissatisfied	3. Neither satisfied nor dissatisfied	4. Satisfied	4. Satisfied	3. Neither satisfied nor dissatisfied	4. Satisfied	4. Satisfied	3. Neither satisfied nor dissatisfied	3. Neither satisfied nor dissatisfied	3. Quite often
2	Sudanese	20 -23 years	Single	Medicine	Third Year	Neither poor nor good	satisfied	1. Not at all	1. Not at all	3. A moderate amount	3. A moderate amount	3. A moderate amount	2. A little	3. A moderate amount	4. Mostly	4. Mostly	3. Moderately	4. Mostly	3. Moderately	4. Good	4. satisfied	4. satisfied	3. Neither satisfied nor dissatisfied	4. Satisfied	4. Satisfied	3. Neither satisfied nor dissatisfied	4. Satisfied	3. Neither satisfied nor dissatisfied	3. Neither satisfied nor dissatisfied	2. Dissatisfied	2. Seldom
2	Sudanese	20 -23 years	Single	Medicine	Third Year	Neither poor nor good	satisfied	1. Not at all	1. Not at all	3. A moderate amount	3. A moderate amount	3. A moderate amount	2. A little	3. A moderate amount	4. Mostly	4. Mostly	3. Moderately	4. Mostly	3. Moderately	4. Good	4. satisfied	4. satisfied	3. Neither satisfied nor dissatisfied	4. Satisfied	4. Satisfied	3. Neither satisfied nor dissatisfied	4. Satisfied	3. Neither satisfied nor dissatisfied	3. Neither satisfied nor dissatisfied	2. Dissatisfied	2. Seldom
2	Sudanese	20 -23 years	Single	Medicine	Third Year	Neither poor nor good	satisfied	2. A little	2. A little	3. A moderate amount	4. Very much	4. Very much	3. A moderate amount	3. A moderate amount	3. Moderately	4. Mostly	4. Mostly	5. Completely	3. Moderately	3. Neither poor nor good	2. Dissatisfied	3. Neither satisfied nor dissatisfied	3. Neither satisfied nor dissatisfied	4. Satisfied	4. Satisfied	3. Neither satisfied nor dissatisfied	4. Satisfied	4. Satisfied	3. Neither satisfied nor dissatisfied	3. Neither satisfied nor dissatisfied	3. Quite often
2	Sudanese	20 -23 years	Single	Medicine	Third Year	Neither poor nor good	satisfied	2. A little	2. A little	3. A moderate amount	4. Very much	4. Very much	3. A moderate amount	3. A moderate amount	3. Moderately	4. Mostly	4. Mostly	5. Completely	3. Moderately	3. Neither poor nor good	2. Dissatisfied	3. Neither satisfied nor dissatisfied	3. Neither satisfied nor dissatisfied	4. Satisfied	4. Satisfied	3. Neither satisfied nor dissatisfied	4. Satisfied	4. Satisfied	3. Neither satisfied nor dissatisfied	3. Neither satisfied nor dissatisfied	3. Quite often
1	Sudanese	20 -23 years	Single	Medicine	Third Year	Neither poor nor good	satisfied	2. A little	1. Not at all	2. A little	3. A moderate amount	3. A moderate amount	1. Not at all	3. A moderate amount	3. Moderately	3. Moderately	2. A little	3. Moderately	2. A little	3. Neither poor nor good	2. Dissatisfied	3. Neither satisfied nor dissatisfied	3. Neither satisfied nor dissatisfied	2. Dissatisfied	4. Satisfied	3. Neither satisfied nor dissatisfied	4. Satisfied	3. Neither satisfied nor dissatisfied	2. Dissatisfied	2. Dissatisfied	3. Quite often
2	Sudanese	20 -23 years	Single	Nursing	Second Year	Neither poor nor good	satisfied	3. A moderate amount	2. A little	3. A moderate amount	3. A moderate amount	3. A moderate amount	4. Very much	4. Very much	3. Moderately	4. Mostly	2. A little	3. Moderately	3. Moderately	2. Poor	3. Neither satisfied nor dissatisfied	3. Neither satisfied nor dissatisfied	3. Neither satisfied nor dissatisfied	4. Satisfied	4. Satisfied	1. Very dissatisfied	3. Neither satisfied nor dissatisfied	3. Neither satisfied nor dissatisfied	3. Neither satisfied nor dissatisfied	2. Dissatisfied	3. Quite often
1	Sudanese	20 -23 years	Single	Laboratory	Second Year	Neither poor nor good	satisfied	2. A little	2. A little	3. A moderate amount	4. Very much	4. Very much	4. Very much	3. A moderate amount	3. Moderately	3. Moderately	3. Moderately	3. Moderately	3. Moderately	3. Neither poor nor good	4. satisfied	4. satisfied	4. satisfied	5. Very Satisfied	4. Satisfied	4. Satisfied	4. Satisfied	3. Neither satisfied nor dissatisfied	2. Dissatisfied	4. Satisfied	1. Never
1	Sudanese	20 -23 years	Married	Pharmacy	Forth year	Neither poor nor good	satisfied	3. A moderate amount	2. A little	2. A little	3. A moderate amount	3. A moderate amount	2. A little	2. A little	3. Moderately	3. Moderately	4. Mostly	1. Not at all	3. Moderately	3. Neither poor nor good	3. Neither satisfied nor dissatisfied	4. satisfied	2. Dissatisfied	4. Satisfied	3. Neither satisfied nor dissatisfied	3. Neither satisfied nor dissatisfied	3. Neither satisfied nor dissatisfied	2. Dissatisfied	3. Neither satisfied nor dissatisfied	3. Neither satisfied nor dissatisfied	3. Quite often
2	Sudanese	< 20 years	Single	Nursing	Forth year	Neither poor nor good	satisfied	2. A little	1. Not at all	5. An extreme amount	5. An extreme amount	3. A moderate amount	5. An extreme amount	4. Very much	1. Not at all	3. Moderately	2. A little	5. Completely	4. Mostly	5. Very good	2. Dissatisfied	5. Very Satisfied	5 .Very Satisfied	5. Very Satisfied	5. Very Satisfied	5. Very Satisfied	4. Satisfied	2. Dissatisfied	3. Neither satisfied nor dissatisfied	4. Satisfied	1. Never
1	Sudanese	20 -23 years	Single	Dentistry	Forth year	Neither poor nor good	satisfied	2. A little	1. Not at all	2. A little	2. A little	3. A moderate amount	3. A moderate amount	3. A moderate amount	3. Moderately	4. Mostly	3. Moderately	3. Moderately	3. Moderately	3. Neither poor nor good	2. Dissatisfied	4. satisfied	3. Neither satisfied nor dissatisfied	2. Dissatisfied	2. Dissatisfied	2. Dissatisfied	3. Neither satisfied nor dissatisfied	4. Satisfied	3. Neither satisfied nor dissatisfied	3. Neither satisfied nor dissatisfied	3. Quite often
2	Sudanese	< 20 years	Single	Nursing	First year	Neither poor nor good	satisfied	1. Not at all	1. Not at all	2. A little	4. Very much	3. A moderate amount	4. Very much	3. A moderate amount	4. Mostly	5. Completely	1. Not at all	3. Moderately	3. Moderately	2. Poor	3. Neither satisfied nor dissatisfied	4. satisfied	5 .Very Satisfied	5. Very Satisfied	4. Satisfied	5. Very Satisfied	5. Very Satisfied	5. Very Satisfied	4. Satisfied	1. Very dissatisfied	2. Seldom
1	Sudanese	>23 Years	Single	Medicine	Fifth year	Neither poor nor good	satisfied	1. Not at all	1. Not at all	2. A little	2. A little	3. A moderate amount	1. Not at all	3. A moderate amount	3. Moderately	3. Moderately	3. Moderately	2. A little	2. A little	3. Neither poor nor good	4. satisfied	3. Neither satisfied nor dissatisfied	3. Neither satisfied nor dissatisfied	2. Dissatisfied	2. Dissatisfied	2. Dissatisfied	3. Neither satisfied nor dissatisfied	3. Neither satisfied nor dissatisfied	3. Neither satisfied nor dissatisfied	2. Dissatisfied	3. Quite often
1	Sudanese	>23 Years	Single	Medicine	Fifth year	Neither poor nor good	satisfied	1. Not at all	1. Not at all	2. A little	2. A little	3. A moderate amount	1. Not at all	3. A moderate amount	3. Moderately	3. Moderately	3. Moderately	2. A little	2. A little	3. Neither poor nor good	4. satisfied	3. Neither satisfied nor dissatisfied	3. Neither satisfied nor dissatisfied	2. Dissatisfied	2. Dissatisfied	2. Dissatisfied	3. Neither satisfied nor dissatisfied	3. Neither satisfied nor dissatisfied	3. Neither satisfied nor dissatisfied	2. Dissatisfied	3. Quite often
2	Sudanese	>23 Years	Single	Laboratory	Fifth year	Neither poor nor good	satisfied	2. A little	1. Not at all	3. A moderate amount	3. A moderate amount	3. A moderate amount	2. A little	2. A little	4. Mostly	5. Completely	3. Moderately	4. Mostly	2. A little	2. Poor	5. Very Satisfied	4. satisfied	4. satisfied	5. Very Satisfied	5. Very Satisfied	3. Neither satisfied nor dissatisfied	5. Very Satisfied	2. Dissatisfied	4. Satisfied	2. Dissatisfied	1. Never
2	Sudanese	>23 Years	Others	Dentistry	Fifth year	Neither poor nor good	satisfied	2. A little	2. A little	2. A little	3. A moderate amount	3. A moderate amount	1. Not at all	3. A moderate amount	3. Moderately	4. Mostly	4. Mostly	3. Moderately	2. A little	3. Neither poor nor good	4. satisfied	3. Neither satisfied nor dissatisfied	3. Neither satisfied nor dissatisfied	3. Neither satisfied nor dissatisfied	4. Satisfied	3. Neither satisfied nor dissatisfied	4. Satisfied	2. Dissatisfied	3. Neither satisfied nor dissatisfied	2. Dissatisfied	3. Quite often
2	Sudanese	>23 Years	Others	Dentistry	Fifth year	Neither poor nor good	satisfied	2. A little	2. A little	2. A little	3. A moderate amount	3. A moderate amount	1. Not at all	3. A moderate amount	3. Moderately	4. Mostly	4. Mostly	3. Moderately	2. A little	3. Neither poor nor good	4. satisfied	3. Neither satisfied nor dissatisfied	3. Neither satisfied nor dissatisfied	3. Neither satisfied nor dissatisfied	4. Satisfied	3. Neither satisfied nor dissatisfied	4. Satisfied	2. Dissatisfied	3. Neither satisfied nor dissatisfied	2. Dissatisfied	3. Quite often
2	Sudanese	20 -23 years	Single	Nursing	Third Year	Good	satisfied	2. A little	1. Not at all	2. A little	3. A moderate amount	2. A little	2. A little	5. An extreme amount	4. Mostly	3. Moderately	4. Mostly	3. Moderately	2. A little	2. Poor	4. satisfied	3. Neither satisfied nor dissatisfied	2. Dissatisfied	4. Satisfied	4. Satisfied	3. Neither satisfied nor dissatisfied	4. Satisfied	2. Dissatisfied	4. Satisfied	2. Dissatisfied	1. Never
2	Sudanese	20 -23 years	Married	Nursing	Third Year	Good	satisfied	2. A little	3. A moderate amount	3. A moderate amount	3. A moderate amount	3. A moderate amount	3. A moderate amount	3. A moderate amount	1. Not at all	1. Not at all	3. Moderately	3. Moderately	2. A little	4. Good	4. satisfied	4. satisfied	4. satisfied	4. Satisfied	5. Very Satisfied	5. Very Satisfied	4. Satisfied	4. Satisfied	4. Satisfied	4. Satisfied	5. Always
2	Sudanese	20 -23 years	Married	Laboratory	Second Year	Good	satisfied	3. A moderate amount	1. Not at all	4. Very much	5. An extreme amount	3. A moderate amount	4. Very much	3. A moderate amount	3. Moderately	4. Mostly	2. A little	3. Moderately	3. Moderately	5. Very good	3. Neither satisfied nor dissatisfied	3. Neither satisfied nor dissatisfied	3. Neither satisfied nor dissatisfied	5. Very Satisfied	5. Very Satisfied	4. Satisfied	4. Satisfied	4. Satisfied	3. Neither satisfied nor dissatisfied	4. Satisfied	2. Seldom
2	Sudanese	20 -23 years	Single	Pharmacy	Forth year	Good	satisfied	3. A moderate amount	1. Not at all	3. A moderate amount	3. A moderate amount	3. A moderate amount	3. A moderate amount	2. A little	3. Moderately	4. Mostly	4. Mostly	3. Moderately	4. Mostly	3. Neither poor nor good	3. Neither satisfied nor dissatisfied	4. satisfied	4. satisfied	4. Satisfied	4. Satisfied	3. Neither satisfied nor dissatisfied	4. Satisfied	4. Satisfied	4. Satisfied	3. Neither satisfied nor dissatisfied	3. Quite often
2	Sudanese	20 -23 years	Single	Medicine	Forth year	Good	satisfied	4. Very much	3. A moderate amount	3. A moderate amount	4. Very much	3. A moderate amount	4. Very much	4. Very much	3. Moderately	3. Moderately	4. Mostly	4. Mostly	3. Moderately	3. Neither poor nor good	2. Dissatisfied	3. Neither satisfied nor dissatisfied	3. Neither satisfied nor dissatisfied	3. Neither satisfied nor dissatisfied	4. Satisfied	3. Neither satisfied nor dissatisfied	4. Satisfied	4. Satisfied	4. Satisfied	4. Satisfied	3. Quite often
1	Sudanese	20 -23 years	Single	Medicine	Forth year	Good	satisfied	3. A moderate amount	3. A moderate amount	3. A moderate amount	4. Very much	4. Very much	4. Very much	4. Very much	4. Mostly	5. Completely	5. Completely	5. Completely	4. Mostly	4. Good	4. satisfied	4. satisfied	3. Neither satisfied nor dissatisfied	4. Satisfied	4. Satisfied	3. Neither satisfied nor dissatisfied	4. Satisfied	4. Satisfied	4. Satisfied	5. Very Satisfied	3. Quite often
2	Sudanese	>23 Years	Married	Nursing	First year	Good	satisfied	2. A little	1. Not at all	4. Very much	3. A moderate amount	3. A moderate amount	4. Very much	4. Very much	5. Completely	5. Completely	5. Completely	3. Moderately	2. A little	2. Poor	3. Neither satisfied nor dissatisfied	5. Very Satisfied	4. satisfied	4. Satisfied	4. Satisfied	4. Satisfied	4. Satisfied	4. Satisfied	4. Satisfied	4. Satisfied	1. Never
1	Sudanese	>23 Years	Single	Nursing	Fifth year	Good	satisfied	3. A moderate amount	3. A moderate amount	4. Very much	4. Very much	5. An extreme amount	4. Very much	4. Very much	4. Mostly	3. Moderately	4. Mostly	2. A little	1. Not at all	2. Poor	4. satisfied	4. satisfied	3. Neither satisfied nor dissatisfied	3. Neither satisfied nor dissatisfied	4. Satisfied	4. Satisfied	4. Satisfied	4. Satisfied	2. Dissatisfied	1. Very dissatisfied	3. Quite often
1	Sudanese	20 -23 years	Single	Medicine	Fifth year	Good	satisfied	2. A little	1. Not at all	4. Very much	4. Very much	4. Very much	3. A moderate amount	3. A moderate amount	4. Mostly	4. Mostly	5. Completely	4. Mostly	4. Mostly	4. Good	3. Neither satisfied nor dissatisfied	4. satisfied	3. Neither satisfied nor dissatisfied	4. Satisfied	3. Neither satisfied nor dissatisfied	3. Neither satisfied nor dissatisfied	5. Very Satisfied	5. Very Satisfied	4. Satisfied	4. Satisfied	2. Seldom
1	Sudanese	>23 Years	Single	Medicine	Fifth year	Good	satisfied	2. A little	1. Not at all	3. A moderate amount	2. A little	3. A moderate amount	3. A moderate amount	2. A little	3. Moderately	2. A little	2. A little	2. A little	2. A little	4. Good	2. Dissatisfied	2. Dissatisfied	4. satisfied	2. Dissatisfied	2. Dissatisfied	1. Very dissatisfied	4. Satisfied	2. Dissatisfied	2. Dissatisfied	2. Dissatisfied	1. Never
2	Sudanese	>23 Years	Others	Medicine	Fifth year	Good	satisfied	2. A little	1. Not at all	3. A moderate amount	3. A moderate amount	3. A moderate amount	2. A little	3. A moderate amount	4. Mostly	4. Mostly	3. Moderately	3. Moderately	3. Moderately	4. Good	4. satisfied	4. satisfied	4. satisfied	4. Satisfied	4. Satisfied	3. Neither satisfied nor dissatisfied	4. Satisfied	4. Satisfied	3. Neither satisfied nor dissatisfied	2. Dissatisfied	2. Seldom
2	Sudanese	< 20 years	Married	Pharmacy	Second Year	Very poor	Neither satisfied nor dissatisfied	3. A moderate amount	3. A moderate amount	2. A little	3. A moderate amount	2. A little	2. A little	3. A moderate amount	3. Moderately	3. Moderately	2. A little	1. Not at all	3. Moderately	3. Neither poor nor good	2. Dissatisfied	3. Neither satisfied nor dissatisfied	3. Neither satisfied nor dissatisfied	3. Neither satisfied nor dissatisfied	4. Satisfied	3. Neither satisfied nor dissatisfied	3. Neither satisfied nor dissatisfied	3. Neither satisfied nor dissatisfied	2. Dissatisfied	3. Neither satisfied nor dissatisfied	5. Always
2	Sudanese	< 20 years	Married	Nursing	First year	Poor	Neither satisfied nor dissatisfied	2. A little	1. Not at all	3. A moderate amount	3. A moderate amount	3. A moderate amount	4. Very much	3. A moderate amount	4. Mostly	3. Moderately	2. A little	4. Mostly	2. A little	2. Poor	4. satisfied	4. satisfied	3. Neither satisfied nor dissatisfied	3. Neither satisfied nor dissatisfied	3. Neither satisfied nor dissatisfied	3. Neither satisfied nor dissatisfied	4. Satisfied	2. Dissatisfied	2. Dissatisfied	1. Very dissatisfied	3. Quite often
1	Sudanese	>23 Years	Divorced	Pharmacy	Third Year	Neither poor nor good	Neither satisfied nor dissatisfied	3. A moderate amount	2. A little	4. Very much	2. A little	3. A moderate amount	3. A moderate amount	2. A little	4. Mostly	3. Moderately	4. Mostly	3. Moderately	3. Moderately	3. Neither poor nor good	5. Very Satisfied	3. Neither satisfied nor dissatisfied	3. Neither satisfied nor dissatisfied	5. Very Satisfied	5. Very Satisfied	3. Neither satisfied nor dissatisfied	5. Very Satisfied	3. Neither satisfied nor dissatisfied	3. Neither satisfied nor dissatisfied	4. Satisfied	1. Never
2	Sudanese	>23 Years	Single	Nursing	Forth year	Neither poor nor good	Neither satisfied nor dissatisfied	3. A moderate amount	2. A little	3. A moderate amount	3. A moderate amount	3. A moderate amount	3. A moderate amount	3. A moderate amount	3. Moderately	1. Not at all	2. A little	2. A little	2. A little	3. Neither poor nor good	3. Neither satisfied nor dissatisfied	2. Dissatisfied	3. Neither satisfied nor dissatisfied	3. Neither satisfied nor dissatisfied	2. Dissatisfied	5. Very Satisfied	3. Neither satisfied nor dissatisfied	3. Neither satisfied nor dissatisfied	3. Neither satisfied nor dissatisfied	2. Dissatisfied	5. Always
2	Sudanese	20 -23 years	Single	Laboratory	Forth year	Neither poor nor good	Neither satisfied nor dissatisfied	2. A little	2. A little	3. A moderate amount	3. A moderate amount	3. A moderate amount	2. A little	4. Very much	3. Moderately	3. Moderately	3. Moderately	3. Moderately	3. Moderately	3. Neither poor nor good	4. satisfied	4. satisfied	3. Neither satisfied nor dissatisfied	3. Neither satisfied nor dissatisfied	3. Neither satisfied nor dissatisfied	2. Dissatisfied	3. Neither satisfied nor dissatisfied	3. Neither satisfied nor dissatisfied	3. Neither satisfied nor dissatisfied	3. Neither satisfied nor dissatisfied	3. Quite often
1	Sudanese	>23 Years	Married	Pharmacy	Fifth year	Neither poor nor good	Neither satisfied nor dissatisfied	3. A moderate amount	3. A moderate amount	3. A moderate amount	4. Very much	3. A moderate amount	3. A moderate amount	3. A moderate amount	3. Moderately	3. Moderately	3. Moderately	3. Moderately	3. Moderately	3. Neither poor nor good	3. Neither satisfied nor dissatisfied	4. satisfied	4. satisfied	5. Very Satisfied	3. Neither satisfied nor dissatisfied	3. Neither satisfied nor dissatisfied	4. Satisfied	3. Neither satisfied nor dissatisfied	3. Neither satisfied nor dissatisfied	3. Neither satisfied nor dissatisfied	3. Quite often
2	Sudanese	< 20 years	Single	Dentistry	Second Year	Good	Neither satisfied nor dissatisfied	2. A little	1. Not at all	3. A moderate amount	3. A moderate amount	3. A moderate amount	2. A little	2. A little	3. Moderately	3. Moderately	4. Mostly	3. Moderately	3. Moderately	4. Good	4. satisfied	2. Dissatisfied	3. Neither satisfied nor dissatisfied	2. Dissatisfied	3. Neither satisfied nor dissatisfied	3. Neither satisfied nor dissatisfied	4. Satisfied	4. Satisfied	4. Satisfied	3. Neither satisfied nor dissatisfied	3. Quite often
2	Sudanese	< 20 years	Divorced	Pharmacy	Forth year	Good	Neither satisfied nor dissatisfied	3. A moderate amount	2. A little	3. A moderate amount	3. A moderate amount	2. A little	3. A moderate amount	3. A moderate amount	4. Mostly	3. Moderately	3. Moderately	4. Mostly	3. Moderately	3. Neither poor nor good	4. satisfied	3. Neither satisfied nor dissatisfied	2. Dissatisfied	3. Neither satisfied nor dissatisfied	3. Neither satisfied nor dissatisfied	3. Neither satisfied nor dissatisfied	3. Neither satisfied nor dissatisfied	4. Satisfied	3. Neither satisfied nor dissatisfied	4. Satisfied	3. Quite often
2	Sudanese	>23 Years	Single	Nursing	First year	Good	Neither satisfied nor dissatisfied	2. A little	2. A little	2. A little	2. A little	2. A little	2. A little	2. A little	4. Mostly	2. A little	2. A little	2. A little	2. A little	4. Good	3. Neither satisfied nor dissatisfied	3. Neither satisfied nor dissatisfied	3. Neither satisfied nor dissatisfied	4. Satisfied	5. Very Satisfied	3. Neither satisfied nor dissatisfied	5. Very Satisfied	5. Very Satisfied	5. Very Satisfied	3. Neither satisfied nor dissatisfied	4. Very often
2	Sudanese	< 20 years	Single	Nursing	Second Year	Poor	Dissatisfied	4. Very much	2. A little	2. A little	2. A little	3. A moderate amount	4. Very much	1. Not at all	1. Not at all	1. Not at all	1. Not at all	3. Moderately	2. A little	2. Poor	4. satisfied	2. Dissatisfied	2. Dissatisfied	1. Very dissatisfied	1. Very dissatisfied	4. Satisfied	2. Dissatisfied	1. Very dissatisfied	1. Very dissatisfied	2. Dissatisfied	4. Very often
2	Sudanese	< 20 years	Single	Nursing	First year	Poor	Dissatisfied	3. A moderate amount	2. A little	1. Not at all	4. Very much	1. Not at all	2. A little	3. A moderate amount	2. A little	2. A little	1. Not at all	3. Moderately	1. Not at all	2. Poor	2. Dissatisfied	3. Neither satisfied nor dissatisfied	2. Dissatisfied	5. Very Satisfied	2. Dissatisfied	3. Neither satisfied nor dissatisfied	5. Very Satisfied	3. Neither satisfied nor dissatisfied	3. Neither satisfied nor dissatisfied	2. Dissatisfied	4. Very often
2	Sudanese	20 -23 years	Single	Nursing	First year	Neither poor nor good	Dissatisfied	3. A moderate amount	3. A moderate amount	2. A little	3. A moderate amount	3. A moderate amount	2. A little	1. Not at all	2. A little	3. Moderately	2. A little	3. Moderately	2. A little	3. Neither poor nor good	1. Very dissatisfied	1. Very dissatisfied	2. Dissatisfied	3. Neither satisfied nor dissatisfied	2. Dissatisfied	2. Dissatisfied	3. Neither satisfied nor dissatisfied	2. Dissatisfied	2. Dissatisfied	1. Very dissatisfied	4. Very often
2	Sudanese	< 20 years	Single	Nursing	First year	Neither poor nor good	Dissatisfied	2. A little	1. Not at all	4. Very much	4. Very much	4. Very much	2. A little	2. A little	4. Mostly	4. Mostly	4. Mostly	3. Moderately	4. Mostly	4. Good	4. satisfied	4. satisfied	3. Neither satisfied nor dissatisfied	4. Satisfied	4. Satisfied	3. Neither satisfied nor dissatisfied	4. Satisfied	4. Satisfied	3. Neither satisfied nor dissatisfied	3. Neither satisfied nor dissatisfied	2. Seldom
1	Sudanese	20 -23 years	Single	Laboratory	Third Year	Good	Dissatisfied	4. Very much	1. Not at all	3. A moderate amount	3. A moderate amount	3. A moderate amount	4. Very much	3. A moderate amount	3. Moderately	4. Mostly	3. Moderately	3. Moderately	3. Moderately	2. Poor	2. Dissatisfied	3. Neither satisfied nor dissatisfied	3. Neither satisfied nor dissatisfied	3. Neither satisfied nor dissatisfied	2. Dissatisfied	3. Neither satisfied nor dissatisfied	4. Satisfied	3. Neither satisfied nor dissatisfied	2. Dissatisfied	2. Dissatisfied	3. Quite often
2	Sudanese	< 20 years	Single	Nursing	First year	Good	Dissatisfied	2. A little	2. A little	3. A moderate amount	4. Very much	3. A moderate amount	3. A moderate amount	4. Very much	2. A little	2. A little	3. Moderately	2. A little	2. A little	4. Good	2. Dissatisfied	2. Dissatisfied	4. satisfied	5. Very Satisfied	5. Very Satisfied	4. Satisfied	4. Satisfied	4. Satisfied	4. Satisfied	2. Dissatisfied	3. Quite often
2	Sudaness	20 -23 years	Single	Nursing	Third Year	Neither poor nor good	satisfied	2. A little	1. Not at all	2. A little	1. Not at all	4. Very much	4. Very much	3. A moderate amount	5. Completely	5. Completely	3. Moderately	3. Moderately	2. A little	3. Neither poor nor good	4. satisfied	5. Very Satisfied	5 .Very Satisfied	4. Satisfied	5. Very Satisfied	3. Neither satisfied nor dissatisfied	4. Satisfied	5. Very Satisfied	4. Satisfied	4. Satisfied	4. Very often
2	Sudaness	20 -23 years	Single	Nursing	Third Year	Good	satisfied	2. A little	2. A little	4. Very much	4. Very much	4. Very much	4. Very much	3. A moderate amount	5. Completely	5. Completely	2. A little	3. Moderately	3. Moderately	2. Poor	5. Very Satisfied	5. Very Satisfied	4. satisfied	4. Satisfied	4. Satisfied	3. Neither satisfied nor dissatisfied	4. Satisfied	4. Satisfied	2. Dissatisfied	4. Satisfied	4. Very often
1	Sudaness	>23 Years	Single	Nursing	Fifth year	Good	satisfied	1. Not at all	1. Not at all	4. Very much	3. A moderate amount	4. Very much	4. Very much	3. A moderate amount	4. Mostly	5. Completely	4. Mostly	3. Moderately	3. Moderately	4. Good	4. satisfied	4. satisfied	4. satisfied	4. Satisfied	4. Satisfied	4. Satisfied	4. Satisfied	4. Satisfied	4. Satisfied	4. Satisfied	2. Seldom
2	Sudani	20 -23 years	Single	Laboratory	Third Year	Good	Satisfied Very	2. A little	1. Not at all	4. Very much	4. Very much	3. A moderate amount	2. A little	1. Not at all	5. Completely	1. Not at all	2. A little	4. Mostly	2. A little	3. Neither poor nor good	4. satisfied	4. satisfied	4. satisfied	5. Very Satisfied	2. Dissatisfied	1. Very dissatisfied	4. Satisfied	3. Neither satisfied nor dissatisfied	5. Very Satisfied	4. Satisfied	2. Seldom
2	sudanuse	< 20 years	Single	Nursing	First year	Good	Very dissatisfied	2. A little	4. Very much	2. A little	3. A moderate amount	5. An extreme amount	5. An extreme amount	4. Very much	5. Completely	4. Mostly	2. A little	3. Moderately	2. A little	2. Poor	2. Dissatisfied	2. Dissatisfied	5 .Very Satisfied	5. Very Satisfied	5. Very Satisfied	5. Very Satisfied	4. Satisfied	1. Very dissatisfied	5. Very Satisfied	4. Satisfied	2. Seldom
1	TANZANIA	>23 Years	Married	Laboratory	Forth year	Very poor	Very dissatisfied	2. A little	5. An extreme amount	1. Not at all	5. An extreme amount	2. A little	2. A little	1. Not at all	2. A little	1. Not at all	4. Mostly	5. Completely	3. Moderately	2. Poor	1. Very dissatisfied	2. Dissatisfied	2. Dissatisfied	2. Dissatisfied	2. Dissatisfied	1. Very dissatisfied	2. Dissatisfied	1. Very dissatisfied	1. Very dissatisfied	3. Neither satisfied nor dissatisfied	4. Very often
2	Tanzania	>23 Years	Single	Pharmacy	Fifth year	Neither poor nor good	Satisfied Very	3. A moderate amount	2. A little	3. A moderate amount	4. Very much	2. A little	2. A little	2. A little	2. A little	4. Mostly	4. Mostly	4. Mostly	3. Moderately	4. Good	2. Dissatisfied	3. Neither satisfied nor dissatisfied	3. Neither satisfied nor dissatisfied	3. Neither satisfied nor dissatisfied	3. Neither satisfied nor dissatisfied	3. Neither satisfied nor dissatisfied	3. Neither satisfied nor dissatisfied	2. Dissatisfied	2. Dissatisfied	2. Dissatisfied	4. Very often
2	Tanzania	>23 Years	Single	Pharmacy	Fifth year	Neither poor nor good	Satisfied Very	3. A moderate amount	2. A little	3. A moderate amount	4. Very much	2. A little	2. A little	2. A little	2. A little	4. Mostly	4. Mostly	4. Mostly	3. Moderately	4. Good	2. Dissatisfied	3. Neither satisfied nor dissatisfied	3. Neither satisfied nor dissatisfied	3. Neither satisfied nor dissatisfied	3. Neither satisfied nor dissatisfied	3. Neither satisfied nor dissatisfied	3. Neither satisfied nor dissatisfied	2. Dissatisfied	2. Dissatisfied	2. Dissatisfied	4. Very often
2	Tanzania	>23 Years	Single	Pharmacy	Fifth year	Neither poor nor good	Satisfied Very	3. A moderate amount	2. A little	3. A moderate amount	4. Very much	2. A little	2. A little	2. A little	2. A little	4. Mostly	4. Mostly	4. Mostly	3. Moderately	4. Good	2. Dissatisfied	3. Neither satisfied nor dissatisfied	3. Neither satisfied nor dissatisfied	3. Neither satisfied nor dissatisfied	3. Neither satisfied nor dissatisfied	3. Neither satisfied nor dissatisfied	3. Neither satisfied nor dissatisfied	2. Dissatisfied	2. Dissatisfied	2. Dissatisfied	4. Very often
2	Tanzania	>23 Years	Married	Nursing	Forth year	Good	Satisfied Very	2. A little	2. A little	4. Very much	4. Very much	4. Very much	4. Very much	3. A moderate amount	5. Completely	5. Completely	4. Mostly	4. Mostly	2. A little	5. Very good	3. Neither satisfied nor dissatisfied	4. satisfied	4. satisfied	5. Very Satisfied	4. Satisfied	3. Neither satisfied nor dissatisfied	1. Very dissatisfied	2. Dissatisfied	3. Neither satisfied nor dissatisfied	3. Neither satisfied nor dissatisfied	3. Quite often
1	Tanzania	>23 Years	Single	Pharmacy	Third Year	Neither poor nor good	satisfied	3. A moderate amount	4. Very much	3. A moderate amount	4. Very much	4. Very much	3. A moderate amount	2. A little	3. Moderately	3. Moderately	2. A little	3. Moderately	2. A little	3. Neither poor nor good	3. Neither satisfied nor dissatisfied	3. Neither satisfied nor dissatisfied	3. Neither satisfied nor dissatisfied	2. Dissatisfied	4. Satisfied	3. Neither satisfied nor dissatisfied	3. Neither satisfied nor dissatisfied	3. Neither satisfied nor dissatisfied	2. Dissatisfied	2. Dissatisfied	2. Seldom
2	Tanzania	>23 Years	Single	Nursing	Third Year	Neither poor nor good	satisfied	2. A little	3. A moderate amount	3. A moderate amount	3. A moderate amount	4. Very much	3. A moderate amount	3. A moderate amount	4. Mostly	5. Completely	3. Moderately	3. Moderately	2. A little	3. Neither poor nor good	4. satisfied	4. satisfied	4. satisfied	4. Satisfied	5. Very Satisfied	5. Very Satisfied	4. Satisfied	4. Satisfied	3. Neither satisfied nor dissatisfied	4. Satisfied	3. Quite often
1	Tanzania	20 -23 years	Single	Medicine	Third Year	Neither poor nor good	satisfied	3. A moderate amount	3. A moderate amount	3. A moderate amount	3. A moderate amount	2. A little	3. A moderate amount	4. Very much	3. Moderately	2. A little	3. Moderately	4. Mostly	3. Moderately	5. Very good	4. satisfied	3. Neither satisfied nor dissatisfied	2. Dissatisfied	3. Neither satisfied nor dissatisfied	2. Dissatisfied	2. Dissatisfied	4. Satisfied	3. Neither satisfied nor dissatisfied	3. Neither satisfied nor dissatisfied	3. Neither satisfied nor dissatisfied	4. Very often
2	Tanzania	20 -23 years	Single	Nursing	Second Year	Good	satisfied	2. A little	2. A little	3. A moderate amount	3. A moderate amount	2. A little	4. Very much	4. Very much	1. Not at all	5. Completely	1. Not at all	3. Moderately	1. Not at all	3. Neither poor nor good	5. Very Satisfied	1. Very dissatisfied	1. Very dissatisfied	3. Neither satisfied nor dissatisfied	3. Neither satisfied nor dissatisfied	5. Very Satisfied	1. Very dissatisfied	2. Dissatisfied	1. Very dissatisfied	3. Neither satisfied nor dissatisfied	5. Always
2	Tanzania	>23 Years	Single	Nursing	Forth year	Good	satisfied	3. A moderate amount	2. A little	2. A little	4. Very much	3. A moderate amount	4. Very much	3. A moderate amount	3. Moderately	3. Moderately	4. Mostly	4. Mostly	3. Moderately	4. Good	4. satisfied	5. Very Satisfied	4. satisfied	4. Satisfied	4. Satisfied	3. Neither satisfied nor dissatisfied	4. Satisfied	4. Satisfied	4. Satisfied	3. Neither satisfied nor dissatisfied	1. Never
1	Tanzania	>23 Years	Married	Dentistry	Fifth year	Good	satisfied	3. A moderate amount	3. A moderate amount	3. A moderate amount	4. Very much	4. Very much	4. Very much	4. Very much	4. Mostly	5. Completely	4. Mostly	4. Mostly	3. Moderately	3. Neither poor nor good	4. satisfied	4. satisfied	4. satisfied	4. Satisfied	4. Satisfied	5. Very Satisfied	4. Satisfied	4. Satisfied	4. Satisfied	4. Satisfied	3. Quite often
1	Tanzania	20 -23 years	Single	Medicine	Second Year	Good	Neither satisfied nor dissatisfied	2. A little	2. A little	3. A moderate amount	4. Very much	2. A little	3. A moderate amount	3. A moderate amount	3. Moderately	2. A little	3. Moderately	2. A little	3. Moderately	3. Neither poor nor good	3. Neither satisfied nor dissatisfied	3. Neither satisfied nor dissatisfied	3. Neither satisfied nor dissatisfied	4. Satisfied	3. Neither satisfied nor dissatisfied	2. Dissatisfied	3. Neither satisfied nor dissatisfied	2. Dissatisfied	2. Dissatisfied	2. Dissatisfied	3. Quite often
2	Tanzanian	>23 Years	Single	Nursing	Forth year	Good	Satisfied Very	2. A little	1. Not at all	4. Very much	4. Very much	3. A moderate amount	5. An extreme amount	3. A moderate amount	4. Mostly	4. Mostly	3. Moderately	3. Moderately	2. A little	4. Good	4. satisfied	4. satisfied	4. satisfied	5. Very Satisfied	5. Very Satisfied	2. Dissatisfied	5. Very Satisfied	3. Neither satisfied nor dissatisfied	4. Satisfied	4. Satisfied	3. Quite often
1	Tanzanian	>23 Years	Single	Laboratory	Forth year	Neither poor nor good	satisfied	2. A little	2. A little	3. A moderate amount	3. A moderate amount	3. A moderate amount	3. A moderate amount	2. A little	3. Moderately	3. Moderately	3. Moderately	3. Moderately	3. Moderately	3. Neither poor nor good	4. satisfied	4. satisfied	4. satisfied	4. Satisfied	3. Neither satisfied nor dissatisfied	2. Dissatisfied	4. Satisfied	4. Satisfied	3. Neither satisfied nor dissatisfied	2. Dissatisfied	3. Quite often
2	Tanzanian	20 -23 years	Single	Medicine	Third Year	Good	satisfied	3. A moderate amount	2. A little	3. A moderate amount	5. An extreme amount	4. Very much	3. A moderate amount	3. A moderate amount	4. Mostly	2. A little	4. Mostly	5. Completely	4. Mostly	3. Neither poor nor good	4. satisfied	3. Neither satisfied nor dissatisfied	3. Neither satisfied nor dissatisfied	4. Satisfied	3. Neither satisfied nor dissatisfied	2. Dissatisfied	4. Satisfied	4. Satisfied	3. Neither satisfied nor dissatisfied	3. Neither satisfied nor dissatisfied	3. Quite often
2	Tanzanian	20 -23 years	Single	Medicine	Third Year	Good	satisfied	3. A moderate amount	2. A little	3. A moderate amount	5. An extreme amount	4. Very much	3. A moderate amount	3. A moderate amount	4. Mostly	2. A little	4. Mostly	5. Completely	4. Mostly	3. Neither poor nor good	4. satisfied	3. Neither satisfied nor dissatisfied	3. Neither satisfied nor dissatisfied	4. Satisfied	3. Neither satisfied nor dissatisfied	2. Dissatisfied	4. Satisfied	4. Satisfied	3. Neither satisfied nor dissatisfied	3. Neither satisfied nor dissatisfied	3. Quite often
2	Tanzanian	20 -23 years	Single	Medicine	Third Year	Good	satisfied	3. A moderate amount	2. A little	3. A moderate amount	5. An extreme amount	4. Very much	3. A moderate amount	3. A moderate amount	4. Mostly	2. A little	4. Mostly	5. Completely	4. Mostly	3. Neither poor nor good	4. satisfied	3. Neither satisfied nor dissatisfied	3. Neither satisfied nor dissatisfied	4. Satisfied	3. Neither satisfied nor dissatisfied	2. Dissatisfied	4. Satisfied	4. Satisfied	3. Neither satisfied nor dissatisfied	3. Neither satisfied nor dissatisfied	3. Quite often
2	Tanzanian	>23 Years	Single	Nursing	Forth year	Good	satisfied	3. A moderate amount	5. An extreme amount	3. A moderate amount	5. An extreme amount	5. An extreme amount	5. An extreme amount	3. A moderate amount	5. Completely	5. Completely	1. Not at all	3. Moderately	2. A little	4. Good	3. Neither satisfied nor dissatisfied	3. Neither satisfied nor dissatisfied	3. Neither satisfied nor dissatisfied	4. Satisfied	4. Satisfied	2. Dissatisfied	4. Satisfied	4. Satisfied	3. Neither satisfied nor dissatisfied	3. Neither satisfied nor dissatisfied	1. Never
1	Tanzanian	>23 Years	Single	Laboratory	Forth year	Good	satisfied	3. A moderate amount	1. Not at all	1. Not at all	3. A moderate amount	3. A moderate amount	3. A moderate amount	3. A moderate amount	5. Completely	3. Moderately	3. Moderately	4. Mostly	3. Moderately	4. Good	4. satisfied	4. satisfied	4. satisfied	5. Very Satisfied	2. Dissatisfied	3. Neither satisfied nor dissatisfied	4. Satisfied	4. Satisfied	4. Satisfied	4. Satisfied	3. Quite often
2	Tanzanian	>23 Years	Single	Dentistry	Forth year	Good	satisfied	3. A moderate amount	3. A moderate amount	3. A moderate amount	4. Very much	3. A moderate amount	3. A moderate amount	3. A moderate amount	3. Moderately	4. Mostly	4. Mostly	3. Moderately	3. Moderately	3. Neither poor nor good	5. Very Satisfied	4. satisfied	3. Neither satisfied nor dissatisfied	4. Satisfied	4. Satisfied	4. Satisfied	4. Satisfied	2. Dissatisfied	3. Neither satisfied nor dissatisfied	3. Neither satisfied nor dissatisfied	3. Quite often
2	Tanzanian	>23 Years	Single	Dentistry	Forth year	Good	satisfied	3. A moderate amount	3. A moderate amount	3. A moderate amount	4. Very much	3. A moderate amount	3. A moderate amount	3. A moderate amount	3. Moderately	4. Mostly	4. Mostly	3. Moderately	3. Moderately	3. Neither poor nor good	5. Very Satisfied	4. satisfied	3. Neither satisfied nor dissatisfied	4. Satisfied	4. Satisfied	4. Satisfied	4. Satisfied	2. Dissatisfied	3. Neither satisfied nor dissatisfied	3. Neither satisfied nor dissatisfied	3. Quite often
1	Tanzanian	>23 Years	Single	Medicine	Fifth year	Good	satisfied	3. A moderate amount	2. A little	3. A moderate amount	4. Very much	4. Very much	4. Very much	3. A moderate amount	3. Moderately	5. Completely	3. Moderately	5. Completely	3. Moderately	4. Good	4. satisfied	4. satisfied	4. satisfied	4. Satisfied	4. Satisfied	4. Satisfied	3. Neither satisfied nor dissatisfied	4. Satisfied	4. Satisfied	4. Satisfied	3. Quite often
2	Tanzanian	>23 Years	Single	Medicine	Second Year	Neither poor nor good	Neither satisfied nor dissatisfied	3. A moderate amount	3. A moderate amount	3. A moderate amount	4. Very much	4. Very much	3. A moderate amount	3. A moderate amount	3. Moderately	5. Completely	3. Moderately	4. Mostly	3. Moderately	3. Neither poor nor good	3. Neither satisfied nor dissatisfied	3. Neither satisfied nor dissatisfied	3. Neither satisfied nor dissatisfied	4. Satisfied	3. Neither satisfied nor dissatisfied	3. Neither satisfied nor dissatisfied	3. Neither satisfied nor dissatisfied	3. Neither satisfied nor dissatisfied	3. Neither satisfied nor dissatisfied	3. Neither satisfied nor dissatisfied	4. Very often
2	Tanzanian	>23 Years	Single	Medicine	Second Year	Neither poor nor good	Neither satisfied nor dissatisfied	3. A moderate amount	3. A moderate amount	3. A moderate amount	4. Very much	4. Very much	3. A moderate amount	3. A moderate amount	3. Moderately	5. Completely	3. Moderately	4. Mostly	3. Moderately	3. Neither poor nor good	3. Neither satisfied nor dissatisfied	3. Neither satisfied nor dissatisfied	3. Neither satisfied nor dissatisfied	4. Satisfied	3. Neither satisfied nor dissatisfied	3. Neither satisfied nor dissatisfied	3. Neither satisfied nor dissatisfied	3. Neither satisfied nor dissatisfied	3. Neither satisfied nor dissatisfied	3. Neither satisfied nor dissatisfied	4. Very often
2	Tanzanian	>23 Years	Single	Nursing	Forth year	Good	Neither satisfied nor dissatisfied	2. A little	1. Not at all	2. A little	3. A moderate amount	4. Very much	4. Very much	3. A moderate amount	4. Mostly	3. Moderately	4. Mostly	3. Moderately	2. A little	3. Neither poor nor good	2. Dissatisfied	3. Neither satisfied nor dissatisfied	3. Neither satisfied nor dissatisfied	4. Satisfied	3. Neither satisfied nor dissatisfied	3. Neither satisfied nor dissatisfied	3. Neither satisfied nor dissatisfied	4. Satisfied	3. Neither satisfied nor dissatisfied	4. Satisfied	4. Very often
1	Tanzanian	>23 Years	Single	Medicine	Fifth year	Poor	Dissatisfied	3. A moderate amount	2. A little	3. A moderate amount	3. A moderate amount	2. A little	3. A moderate amount	2. A little	3. Moderately	4. Mostly	2. A little	3. Moderately	2. A little	4. Good	4. satisfied	4. satisfied	2. Dissatisfied	4. Satisfied	4. Satisfied	2. Dissatisfied	4. Satisfied	4. Satisfied	2. Dissatisfied	4. Satisfied	3. Quite often
2	Tchd	20 -23 years	Single	Medicine	Fifth year	Good	satisfied	4. Very much	2. A little	4. Very much	3. A moderate amount	4. Very much	4. Very much	4. Very much	3. Moderately	4. Mostly	3. Moderately	3. Moderately	3. Moderately	4. Good	4. satisfied	4. satisfied	4. satisfied	1. Very dissatisfied	4. Satisfied	4. Satisfied	4. Satisfied	4. Satisfied	4. Satisfied	2. Dissatisfied	4. Very often
1	Togo	>23 Years	Single	Dentistry	Fifth year	Good	satisfied	2. A little	1. Not at all	3. A moderate amount	3. A moderate amount	3. A moderate amount	3. A moderate amount	3. A moderate amount	3. Moderately	4. Mostly	3. Moderately	3. Moderately	3. Moderately	4. Good	4. satisfied	4. satisfied	4. satisfied	4. Satisfied	4. Satisfied	4. Satisfied	4. Satisfied	4. Satisfied	4. Satisfied	4. Satisfied	3. Quite often
1	Togo	< 20 years	Single	Dentistry	First year	Neither poor nor good	Neither satisfied nor dissatisfied	3. A moderate amount	2. A little	2. A little	4. Very much	3. A moderate amount	2. A little	3. A moderate amount	4. Mostly	2. A little	3. Moderately	3. Moderately	2. A little	3. Neither poor nor good	2. Dissatisfied	3. Neither satisfied nor dissatisfied	3. Neither satisfied nor dissatisfied	4. Satisfied	4. Satisfied	3. Neither satisfied nor dissatisfied	4. Satisfied	2. Dissatisfied	3. Neither satisfied nor dissatisfied	3. Neither satisfied nor dissatisfied	4. Very often
1	Togo	>23 Years	Single	Dentistry	Fifth year	Neither poor nor good	Neither satisfied nor dissatisfied	3. A moderate amount	4. Very much	3. A moderate amount	3. A moderate amount	3. A moderate amount	3. A moderate amount	3. A moderate amount	4. Mostly	5. Completely	3. Moderately	4. Mostly	3. Moderately	3. Neither poor nor good	2. Dissatisfied	3. Neither satisfied nor dissatisfied	3. Neither satisfied nor dissatisfied	4. Satisfied	4. Satisfied	4. Satisfied	4. Satisfied	3. Neither satisfied nor dissatisfied	3. Neither satisfied nor dissatisfied	3. Neither satisfied nor dissatisfied	4. Very often
2	togolese	20 -23 years	Married	Nursing	Third Year	Good	satisfied	3. A moderate amount	3. A moderate amount	3. A moderate amount	3. A moderate amount	3. A moderate amount	3. A moderate amount	3. A moderate amount	4. Mostly	5. Completely	5. Completely	3. Moderately	3. Moderately	4. Good	4. satisfied	4. satisfied	4. satisfied	4. Satisfied	5. Very Satisfied	4. Satisfied	4. Satisfied	4. Satisfied	4. Satisfied	5. Very Satisfied	3. Quite often
1	Togolese	>23 Years	Single	Laboratory	Forth year	Neither poor nor good	Dissatisfied	3. A moderate amount	3. A moderate amount	2. A little	3. A moderate amount	2. A little	3. A moderate amount	2. A little	2. A little	4. Mostly	2. A little	2. A little	2. A little	3. Neither poor nor good	3. Neither satisfied nor dissatisfied	3. Neither satisfied nor dissatisfied	3. Neither satisfied nor dissatisfied	3. Neither satisfied nor dissatisfied	4. Satisfied	1. Very dissatisfied	3. Neither satisfied nor dissatisfied	2. Dissatisfied	3. Neither satisfied nor dissatisfied	4. Satisfied	4. Very often
2	Uganda	20 -23 years	Single	Laboratory	First year	Good	Very dissatisfied	3. A moderate amount	2. A little	2. A little	3. A moderate amount	1. Not at all	3. A moderate amount	4. Very much	5. Completely	5. Completely	4. Mostly	5. Completely	1. Not at all	2. Poor	1. Very dissatisfied	4. satisfied	4. satisfied	5. Very Satisfied	2. Dissatisfied	3. Neither satisfied nor dissatisfied	4. Satisfied	4. Satisfied	4. Satisfied	4. Satisfied	3. Quite often
2	Uganda	>23 Years	Single	Pharmacy	Forth year	Good	satisfied	3. A moderate amount	3. A moderate amount	3. A moderate amount	3. A moderate amount	4. Very much	5. An extreme amount	4. Very much	4. Mostly	1. Not at all	2. A little	1. Not at all	2. A little	1. Very poor	2. Dissatisfied	1. Very dissatisfied	1. Very dissatisfied	1. Very dissatisfied	2. Dissatisfied	1. Very dissatisfied	1. Very dissatisfied	2. Dissatisfied	2. Dissatisfied	3. Neither satisfied nor dissatisfied	2. Seldom
2	Uganda	>23 Years	Single	Dentistry	Fifth year	Good	satisfied	1. Not at all	3. A moderate amount	4. Very much	4. Very much	4. Very much	4. Very much	4. Very much	4. Mostly	5. Completely	3. Moderately	3. Moderately	3. Moderately	4. Good	4. satisfied	4. satisfied	4. satisfied	5. Very Satisfied	5. Very Satisfied	4. Satisfied	4. Satisfied	3. Neither satisfied nor dissatisfied	4. Satisfied	3. Neither satisfied nor dissatisfied	3. Quite often
2	Uganda	>23 Years	Single	Nursing	Forth year	Good	Neither satisfied nor dissatisfied	4. Very much	3. A moderate amount	3. A moderate amount	4. Very much	3. A moderate amount	4. Very much	3. A moderate amount	2. A little	4. Mostly	3. Moderately	5. Completely	3. Moderately	3. Neither poor nor good	3. Neither satisfied nor dissatisfied	5. Very Satisfied	4. satisfied	5. Very Satisfied	4. Satisfied	5. Very Satisfied	4. Satisfied	3. Neither satisfied nor dissatisfied	2. Dissatisfied	3. Neither satisfied nor dissatisfied	3. Quite often
1	Uganda	20 -23 years	Single	Pharmacy	Forth year	Very good	Dissatisfied	1. Not at all	1. Not at all	1. Not at all	1. Not at all	1. Not at all	1. Not at all	1. Not at all	1. Not at all	3. Moderately	4. Mostly	2. A little	4. Mostly	4. Good	3. Neither satisfied nor dissatisfied	4. satisfied	2. Dissatisfied	4. Satisfied	3. Neither satisfied nor dissatisfied	4. Satisfied	3. Neither satisfied nor dissatisfied	2. Dissatisfied	4. Satisfied	4. Satisfied	4. Very often
2	Ugandan	20 -23 years	Single	Medicine	Third Year	Neither poor nor good	satisfied	3. A moderate amount	2. A little	2. A little	3. A moderate amount	3. A moderate amount	3. A moderate amount	2. A little	4. Mostly	5. Completely	2. A little	5. Completely	2. A little	3. Neither poor nor good	5. Very Satisfied	4. satisfied	4. satisfied	5. Very Satisfied	4. Satisfied	2. Dissatisfied	2. Dissatisfied	2. Dissatisfied	2. Dissatisfied	2. Dissatisfied	4. Very often
2	Ugandan	20 -23 years	Single	Medicine	Third Year	Neither poor nor good	satisfied	3. A moderate amount	2. A little	2. A little	3. A moderate amount	3. A moderate amount	3. A moderate amount	2. A little	4. Mostly	5. Completely	2. A little	5. Completely	2. A little	3. Neither poor nor good	5. Very Satisfied	4. satisfied	4. satisfied	5. Very Satisfied	4. Satisfied	2. Dissatisfied	2. Dissatisfied	2. Dissatisfied	2. Dissatisfied	2. Dissatisfied	4. Very often
2	Ugandan	20 -23 years	Single	Medicine	Third Year	Neither poor nor good	satisfied	3. A moderate amount	2. A little	2. A little	3. A moderate amount	3. A moderate amount	3. A moderate amount	2. A little	4. Mostly	5. Completely	2. A little	5. Completely	2. A little	3. Neither poor nor good	5. Very Satisfied	4. satisfied	4. satisfied	5. Very Satisfied	4. Satisfied	2. Dissatisfied	2. Dissatisfied	2. Dissatisfied	2. Dissatisfied	2. Dissatisfied	4. Very often
2	Ugandan	>23 Years	Married	Nursing	Forth year	Good	satisfied	2. A little	1. Not at all	3. A moderate amount	3. A moderate amount	3. A moderate amount	3. A moderate amount	3. A moderate amount	3. Moderately	5. Completely	4. Mostly	4. Mostly	2. A little	3. Neither poor nor good	2. Dissatisfied	3. Neither satisfied nor dissatisfied	4. satisfied	4. Satisfied	5. Very Satisfied	5. Very Satisfied	3. Neither satisfied nor dissatisfied	4. Satisfied	3. Neither satisfied nor dissatisfied	2. Dissatisfied	3. Quite often
2	Ugandan	>23 Years	Single	Medicine	Forth year	Good	satisfied	3. A moderate amount	2. A little	3. A moderate amount	4. Very much	5. An extreme amount	3. A moderate amount	3. A moderate amount	4. Mostly	4. Mostly	3. Moderately	4. Mostly	3. Moderately	4. Good	3. Neither satisfied nor dissatisfied	4. satisfied	5 .Very Satisfied	5. Very Satisfied	4. Satisfied	4. Satisfied	3. Neither satisfied nor dissatisfied	4. Satisfied	3. Neither satisfied nor dissatisfied	3. Neither satisfied nor dissatisfied	1. Never
1	Ugandan	>23 Years	Single	Laboratory	Forth year	Good	satisfied	2. A little	1. Not at all	3. A moderate amount	4. Very much	4. Very much	4. Very much	4. Very much	5. Completely	5. Completely	4. Mostly	5. Completely	3. Moderately	4. Good	4. satisfied	4. satisfied	4. satisfied	4. Satisfied	4. Satisfied	3. Neither satisfied nor dissatisfied	4. Satisfied	4. Satisfied	4. Satisfied	4. Satisfied	2. Seldom
2	Ugandan	>23 Years	Single	Nursing	Forth year	Neither poor nor good	Neither satisfied nor dissatisfied	3. A moderate amount	2. A little	3. A moderate amount	4. Very much	4. Very much	3. A moderate amount	3. A moderate amount	3. Moderately	5. Completely	3. Moderately	4. Mostly	4. Mostly	4. Good	4. satisfied	2. Dissatisfied	4. satisfied	5. Very Satisfied	5. Very Satisfied	5. Very Satisfied	4. Satisfied	3. Neither satisfied nor dissatisfied	3. Neither satisfied nor dissatisfied	4. Satisfied	1. Never
2	Ugandan	>23 Years	Single	Medicine	Forth year	Neither poor nor good	Dissatisfied	4. Very much	4. Very much	2. A little	3. A moderate amount	3. A moderate amount	3. A moderate amount	3. A moderate amount	3. Moderately	3. Moderately	2. A little	4. Mostly	2. A little	3. Neither poor nor good	3. Neither satisfied nor dissatisfied	3. Neither satisfied nor dissatisfied	3. Neither satisfied nor dissatisfied	3. Neither satisfied nor dissatisfied	3. Neither satisfied nor dissatisfied	3. Neither satisfied nor dissatisfied	4. Satisfied	3. Neither satisfied nor dissatisfied	3. Neither satisfied nor dissatisfied	3. Neither satisfied nor dissatisfied	5. Always
1	Yemen	>23 Years	Single	Medicine	Forth year	Very good	Neither satisfied nor dissatisfied	3. A moderate amount	3. A moderate amount	4. Very much	3. A moderate amount	4. Very much	4. Very much	4. Very much	4. Mostly	4. Mostly	4. Mostly	5. Completely	3. Moderately	3. Neither poor nor good	3. Neither satisfied nor dissatisfied	4. satisfied	3. Neither satisfied nor dissatisfied	3. Neither satisfied nor dissatisfied	5. Very Satisfied	3. Neither satisfied nor dissatisfied	4. Satisfied	1. Very dissatisfied	3. Neither satisfied nor dissatisfied	3. Neither satisfied nor dissatisfied	3. Quite often
1	Yemeni	20 -23 years	Single	Medicine	Third Year	Neither poor nor good	Neither satisfied nor dissatisfied	2. A little	2. A little	4. Very much	5. An extreme amount	4. Very much	3. A moderate amount	2. A little	2. A little	4. Mostly	4. Mostly	4. Mostly	2. A little	3. Neither poor nor good	2. Dissatisfied	2. Dissatisfied	3. Neither satisfied nor dissatisfied	3. Neither satisfied nor dissatisfied	3. Neither satisfied nor dissatisfied	4. Satisfied	4. Satisfied	4. Satisfied	3. Neither satisfied nor dissatisfied	4. Satisfied	4. Very often
2	Yemeny	20 -23 years	Single	Medicine	Third Year	Good	Neither satisfied nor dissatisfied	5. An extreme amount	4. Very much	3. A moderate amount	3. A moderate amount	3. A moderate amount	3. A moderate amount	3. A moderate amount	3. Moderately	3. Moderately	4. Mostly	4. Mostly	3. Moderately	3. Neither poor nor good	3. Neither satisfied nor dissatisfied	3. Neither satisfied nor dissatisfied	2. Dissatisfied	3. Neither satisfied nor dissatisfied	4. Satisfied	2. Dissatisfied	4. Satisfied	4. Satisfied	4. Satisfied	4. Satisfied	4. Very often

## Sheet: Code
Gender
	Male	1
	Female	2
Nationality
	Yemen	1
	Uganda	2
	Togo	3
	Tanzanian	4
	Sudan	5
	Somalia	6
	Senegal	7
	Nigeria	8
	Mozambique	9
	Malawi	10
	Liberian	11
	Kenyan	12
	India	13
	Hamda	14
	Ghana	15
	Eyggpt	16
	Ethiopian	17
	Ertrian	18
	Djibouti	19
	Comoros	20
	Chadian	21
	Abbas salih suliman	22
Age Group
	< 20 years	1
	20 -23 years	2
	>23 Years	3
Marital Status
	Single	1
	Married	2
	Divorced	3
Faculty
	Pharmacy	1
	Nursing	2
	Medicine	3
	Laboratory	4
	Dentistry	5
Year
	First Year	1
	Second Year	2
	Third Year	3
	Fourth Year	4
	fifth Year	5
Q1	Very poor	1
	poor	2
	Neither poor nor good	3
	Good	4
	very good	5
	• Item 1 and Item 15: 1 = very poor, 2 = poor, 3 = neither poor nor good, 4 = good, 5 =
	very good
	• Item 2, items 16- 25: 1 = very dissatisfied, 2 = dissatisfied, 3 = neither satisfied nor
	dissatisfied, 4 = satisfied, 5 = very satisfied
	• Items 3-14: 1 = not at all, 2 = a little, 3 = a moderate amount, 4 = very much, 5 = an
	extreme amount
	• Item 26: 1 = never, 2 = seldom, 3 = quite often, 4 = very often, 5 = always
	• Domain 1 = Q3, Q4, Q10, Q15, Q16, Q17, Q18
	• Domain 2 = Q5, Q6, Q7, Q11, Q19, Q26
	• Domain 3 = Q20, Q21, Q22
	• Domain 4 = Q8, Q9, Q12, Q13, Q14, Q23, Q24, Q25
